# Supplementary material
Source: publisher figshare collection journal article supplement (https://gsapubs.figshare.com/ndownloader/files/39547843)
Supplement: Supplementary file 1 [file 39547843]

## Sheet: S1 Zircon trace element data
Table S1. LA-ICP-MS zircon trace element results for intrusive rocks from the Zhegu, Wengmunong, and Dulu plutons in the central Lhasa subterrane.
Analyses	Sc	Ti	Y	Zr	Nb	La	Ce	Pr	Nd	Sm	Eu	Gd	Tb	Dy	Ho	Er	Tm	Yb	Lu	Hf	Ta	Pb	Th	U	Th/U
14RD01 01	257.17	10.9468	882.966	489700	1.55266	0.560456	26.9485	0.238907	1.91154	2.61111	0.590893	16.6038	5.82876	72.7772	29.0504	134.825	30.2691	289.895	58.1376	11578.5	1.14486	8.21856	261.563	260.1	1.00562
14RD01 02	262.052	12.6946	1038.27	489700	1.30108	0.182965	21.2414	0.154732	2.19836	3.39641	0.834318	21.0873	7.00219	87.7896	34.5887	159.013	34.7852	332.571	68.1274	10843	1.03117	9.37664	306.126	284.543	1.07585
14RD01 03	251.086	8.29207	826.03	489700	1.88328	0.320525	28.805	0.125988	1.20512	2.19459	0.46333	14.3343	5.08945	64.4884	26.7188	129.39	28.6126	281.808	57.6466	11909.4	1.42403	10.1903	301.592	327.548	0.920756
14RD01 04	254.629	12.1077	769.635	489700	1.63476	1.47834	29.1552	0.429696	2.52974	2.71213	0.525172	13.5917	4.76559	60.9209	24.926	118.99	26.1558	255.831	52.9958	11632.6	1.24065	8.9552	280.401	281.965	0.994452
14RD01 05	269.528	11.1287	1415.97	489700	3.23123	2.30412	48.0548	0.727544	4.98306	4.85309	0.966839	26.6444	9.15671	114.966	46.6796	219.164	47.9273	463.775	92.0311	11646	2.07424	20.5783	663.18	613.798	1.08045
14RD01 06	261.293	10.6461	904.383	489700	1.62917	17.6339	63.3032	4.69196	20.477	6.17101	0.78295	19.5789	6.18384	73.3884	29.4317	138.73	30.2045	296.078	60.5991	11565	1.06386	8.60492	283.209	270.555	1.04677
14RD01 07	270.762	12.8482	1107.8	489700	1.12024	0.0231971	20.7275	0.114317	2.00826	4.10096	0.944268	22.6856	7.72396	93.8243	36.6567	169.709	36.5894	345.152	69.807	10809.6	0.865248	7.85528	263.139	239.874	1.09699
14RD01 08	251.073	13.5581	818.125	489700	1.48686	0.21039	23.9452	0.0859161	1.32827	2.28757	0.505544	14.6395	5.29772	66.6929	26.1927	125.899	27.8966	272.667	54.4004	11642.4	1.15122	7.80056	235.529	244.7	0.962524
14RD01 09	257.028	34.5996	904.248	489700	2.69502	3.10354	38.1901	0.777614	3.93828	2.9582	0.529538	15.4151	5.46692	70.6911	29.1707	141.013	31.8203	316.264	64.4237	12105.6	1.6674	12.5384	362.112	388.873	0.931183
14RD01 10	268.654	9.00195	1223.39	489700	2.57899	2.1987	39.5442	0.614862	3.98531	4.31729	0.697743	21.6609	7.79567	98.1227	40.1841	190.662	42.3251	411.754	84.8003	11988	1.8172	14.9728	473.553	460.355	1.02867
14RD01 11	268.685	9.52736	940.212	489700	4.17884	0.16225	32.6932	0.0872622	0.985414	2.66904	0.474766	16.3393	6.02536	76.9743	31.7401	149.096	33.8623	331.544	67.1754	11933.7	2.23701	97.6661	355.267	628.621	0.565153
14RD01 12	250.978	10.6862	740.402	489700	1.66831	0.296489	24.6927	0.0959462	1.01107	2.09128	0.376873	11.8512	4.45833	58.2236	23.6943	114.078	25.7092	252.828	52.1499	11834.2	1.16813	8.31915	235.185	263.08	0.893966
14RD01 13	259.001	12.0555	767.962	489700	1.43554	0.00582963	23.8444	0.0527179	1.0917	2.03015	0.519633	13.2173	4.85907	60.8916	24.528	117.441	25.9837	251.949	52.0124	11184.1	1.04322	8.73166	272.376	271.169	1.00445
14RD01 14	276.292	10.0084	1194.08	489700	2.67693	0.586826	39.5586	0.351343	2.76586	4.0083	0.788265	21.9277	7.56088	95.8657	38.8771	183.363	39.9769	382.889	79.2082	11398.6	1.55576	13.8233	578.427	430.023	1.34511
14RD01 15	262.179	8.2832	923.099	489700	2.10663	1.23755	29.94	0.369983	2.17963	2.57773	0.568016	15.7653	5.5466	72.5698	29.6601	144.006	32.3521	314.062	65.5425	11865	1.54482	10.2575	311.23	330.006	0.943102
14RD01 16	256.088	296.686	845.819	489700	2.86478	0.0396832	24.6518	0.0971879	1.2372	2.60695	0.48316	15.1735	5.30062	67.316	26.9802	129.371	28.0392	277.852	56.6831	11755.4	1.15926	8.58001	253.429	260.362	0.973373
14RD01 17	262.19	11.2026	876.604	489700	1.81572	0.225397	26.7863	0.109621	1.32605	2.40094	0.430428	15.6257	5.42928	67.7074	28.1706	134.934	29.9901	292.186	61.2233	11555.9	1.24134	9.74421	294.114	305.738	0.961982
14RD01 18	250.141	11.9224	726.074	489700	1.57944	0.0307992	24.843	0.0446691	0.731924	2.07367	0.391102	12.6203	4.51654	56.72	23.1051	110.473	24.7634	238.434	49.5318	11825.1	1.08335	8.11595	246.211	254.141	0.968797
14RD04 01	283.337	38.7861	1485.71	489700	3.30715	0.880008	49.2771	0.267958	2.64466	4.20849	0.983411	26.9294	9.41861	117.755	46.8509	219.532	46.8476	446.483	90.0343	11253.7	1.75211	24.4425	919.05	634.067	1.44945
14RD04 02	272.477	7.08752	1482.29	489700	3.12037	0.00874013	49.541	0.120261	2.05186	4.52683	0.865484	25.6371	8.96445	116.386	47.7525	225.021	50.1009	479.162	98.9048	11975.9	2.25896	24.3306	754.061	746.702	1.00986
14RD04 03	340.816	17.4525	3939.52	489700	8.23207	0.17417	113.001	0.48062	7.19779	13.181	2.62074	79.3081	27.3515	332.635	131.117	580.897	118.56	1041.58	207.074	9573.44	3.01211	57.621	3035.56	1381.2	2.19777
14RD04 04	299.082	12.9937	2337.37	489700	3.7074	4.18112	72.1479	1.21423	7.79595	8.65998	1.61997	46.8415	15.9835	195.681	76.54	346.122	73.3445	675.869	136.245	10992.7	2.09753	29.5499	1319.4	832.658	1.58457
14RD04 05	298.772	17.5385	3850.07	489700	5.51459	3.27752	103.541	1.17009	10.7342	15.3053	2.98498	83.651	27.6939	330.348	127.049	561.247	114.092	1021.91	201.651	10881.8	2.48103	46.2208	2252.46	1161.15	1.93985
14RD04 06	302.903	10.2729	5612.84	489700	6.48016	0.196943	113.8	0.866332	11.9889	20.7576	3.78995	117.163	39.5609	483.246	189.21	821.317	164.627	1450.67	284.564	10176.4	2.61394	55.6369	2809.43	1410.05	1.99244
14RD04 07	280.651	10.9366	1525.72	489700	3.00278	10.2461	54.1721	0.691458	2.93121	4.7772	0.969707	27.5406	9.46385	121.584	49.254	229.013	49.5237	458.144	93.9033	11789.7	1.77261	17.7112	660.595	508.683	1.29864
14RD04 08	275.91	8.90234	2297.72	489700	2.83329	0.0265287	50.4837	0.27106	4.18975	8.00513	1.66978	44.9388	15.5183	189.013	75.4076	343.094	72.3314	664.173	135.157	11666.3	1.64934	25.6546	920.211	757.386	1.21498
14RD04 09	281.31	8.81917	1962.49	489700	2.64045	7.61672	63.6976	1.67315	8.53304	7.31031	1.34662	38.0861	12.9582	159.411	63.4691	293.614	63.2327	591.604	121.801	11858.8	1.59631	20.0139	745.513	579.151	1.28725
14RD04 10	271.305	6.51103	1531.08	489700	2.5755	0.0497495	40.694	0.102649	2.04266	4.40414	1.06412	27.69	9.71321	118.971	48.8574	233.651	52.0278	500.729	105.714	12315.6	1.88506	19.3624	589.766	603.232	0.977677
14RD04 11	287.834	56.6198	2942.56	489700	4.28551	170.652	323.647	23.4957	80.8237	17.5186	2.41182	65.2788	21.4415	255.086	97.5822	438.352	90.9397	818.836	163.715	11804.5	2.2474	38.2807	1691.05	946.743	1.78618
14RD04 12	276.846	7.95698	1767.36	489700	3.45251	0.0231678	56.5158	0.163392	2.47766	5.15089	0.973941	30.7254	10.9932	139.157	56.5483	263.888	58.043	547.414	112.863	12066	1.9251	20.8686	802.053	595.555	1.34673
14RD04 13	271.485	9.85675	1787.16	489700	2.61736	0.0492595	45.5489	0.148791	2.85379	5.44727	1.25412	33.3984	12.0021	144.133	56.7868	263.253	57.1391	518.594	106.316	12010.9	1.74448	20.2775	758.709	592.889	1.27968
14RD04 14	292.468	19.8076	2504.52	489700	5.30172	6.11977	82.3012	2.04407	13.6339	10.7542	2.65632	47.6856	16.7083	207.99	82.0963	374.531	79.8141	726.423	150.083	10824.1	2.65516	41.9447	1295.19	891.262	1.45321
14RD04 15	372.782	15.2483	6740.12	489700	8.92051	0.2258	148.601	0.948195	14.211	25.5107	5.21616	156.093	51.7977	616.656	231.374	977.957	193.345	1659.67	322.736	10348.9	3.36283	77.4294	4298.02	1866.79	2.30236
14RD04 16	361.599	16.0361	2487.95	489700	4.99947	29.8241	117.987	11.174	58.3308	26.401	4.26795	73.5921	21.6712	239.135	86.8946	369.631	75.8027	668.826	131.844	11510.5	2.16568	23.5983	621.697	572.458	1.08601
14MM34 01	256.252	4.93488	1007.84	489700	2.92176	7.98615	48.1176	2.31075	10.8984	4.28463	0.56772	16.297	5.9435	76.313	32.1554	160.614	36.8111	366.012	77.3404	12346.5	2.0176	10.7367	322.829	354.796	0.909902
14MM34 02	255.804	4.33693	713.265	489700	1.43243	0.0084488	13.0561	0.0403332	0.585375	1.29872	0.49908	9.06017	3.69967	48.6085	21.8145	116.788	28.5168	308.702	73.9374	11788.5	0.953047	12.0205	289.003	428.821	0.673949
14MM34 03	250.654	3.15218	933.655	489700	1.14032	0.316751	14.3356	0.20062	1.99347	3.06473	0.911967	15.4819	5.46828	67.4522	28.4702	146.148	35.1372	379.903	89.2488	11396.5	0.739791	13.5831	404.689	467.641	0.865384
14MM34 04	249.969	3.96857	723.324	489700	1.99152	2.02222	21.7209	0.469582	2.46161	2.04359	0.465166	10.8211	4.02974	52.6061	22.8129	115.386	27.282	287.223	66.2428	12038.9	1.36311	19.0152	573.524	657.807	0.871873
14MM34 05	252.87	20.5473	889.567	489700	2.91416	1.61804	28.5253	0.428516	2.60767	2.1428	0.351805	13.1339	4.94298	66.1995	28.3552	143.239	32.7938	328.664	71.2439	11810.2	1.85724	10.1227	295.878	319.462	0.926174
14MM34 06	260.124	6.65419	1220.39	489700	3.8653	17.9906	78.0149	5.09227	24.1084	7.61644	0.67386	21.4669	7.41976	93.3602	39.0646	194.781	44.4769	445.772	92.6639	12549	2.56963	13.8344	438.329	447.414	0.979693
14MM34 07	243.266	2.833	651.297	489700	1.50511	8.8408	31.769	1.94708	7.84246	2.49787	0.440048	10.0548	3.56929	46.7972	20.5151	105.665	24.956	267.777	61.1551	12552.5	1.21605	13.7449	300.948	509.928	0.590178
14MM34 08	259.169	5.31683	1099.81	489700	3.29233	17.5564	76.5061	6.15438	29.1357	8.62125	0.738336	21.8489	6.92624	84.7692	35.3631	176.711	39.3124	399.504	83.7845	12522.6	2.22691	11.8013	366.324	396.371	0.924193
14MM34 09	251.283	5.89735	1010.83	489700	3.26719	4.35292	37.5681	1.30988	5.8852	2.89191	0.378177	15.736	5.80431	76.5435	33.0547	162.863	37.2595	376.723	80.2127	12861.5	2.29275	11.02	321.34	378.437	0.849123
14MM34 10	255.434	4.3784	1167.09	489700	4.36608	7.32037	52.2027	2.53904	11.4539	4.7663	0.441835	18.8587	7.03241	90.0974	38.2187	189.252	42.422	422.71	89.0822	12634.2	2.83403	12.7645	387.241	436.12	0.887923
14MM34 11	254.952	4.96296	1207.01	489700	3.70585	31.9809	106.545	9.17759	39.6594	9.90795	0.719631	23.3152	7.54919	93.0831	39.2332	194.356	44.2597	444.239	94.949	12789.6	2.71	11.8749	377.676	415.297	0.909412
14MM34 12	234.964	3.7249	526.701	489700	1.14153	0.520927	12.3291	0.111283	0.928324	1.07916	0.352299	6.93117	2.59801	36.0335	16.1597	85.7695	20.8681	233.545	55.4727	12279.4	1.01476	11.3611	259.486	421.741	0.615273
14MM34 13	256.799	3.63247	1236.72	489700	3.683	2.71702	36.5523	0.840695	4.25634	2.8594	0.404187	17.9201	6.72334	92.0397	39.8179	200.487	46.3979	460.754	98.9683	12460.8	2.62078	12.2886	343.851	389.404	0.883018
14MM34 14	256.144	4.96132	1396.09	489700	5.38107	5.15334	52.0048	1.56486	7.30318	4.35438	0.471607	20.9176	7.85272	105.97	45.4562	225.721	51.6094	514.558	109.072	12853.7	3.60949	17.0055	519.081	567.258	0.91507
14MM34 15	260.847	7.13903	1166.42	489700	3.30755	5.78831	43.7676	1.6092	8.15823	4.0787	0.548523	19.2231	6.85383	89.1828	37.5763	184.12	42.1025	417.713	88.5732	12447.3	2.25333	11.2938	366.451	390.259	0.938993
14MM34 16	281.632	8.48491	1299.41	489700	2.93749	3.70868	39.8891	1.07824	5.50758	4.05081	0.728451	22.415	7.96996	99.9799	42.1622	200.424	44.588	442.848	92.6212	11176.4	1.88611	11.6169	418.481	372.785	1.12258
14MM34 17	256.704	6.91787	1052.12	489700	3.06099	5.72335	41.849	1.69822	7.90346	3.71934	0.523246	16.9174	6.04144	79.0875	33.5622	165.958	37.9805	378.951	79.6845	12324.6	2.04878	10.4415	331.627	363.962	0.911157
14MM34 18	243.363	5.1885	756.795	489700	2.01338	1.14415	20.4778	0.283716	1.71873	1.78904	0.431728	10.8306	4.03628	54.285	23.8633	120.63	28.6448	298.851	66.4068	12162.1	1.40718	12.9328	363.933	456.616	0.797022
14MM19 01	286.05	7.25123	1056.76	489700	3.42197	0.279938	32.3378	0.321849	2.31571	2.54129	0.86944	14.9022	5.57709	75.9217	33.0593	167.313	41.1037	435.438	97.7171	11428.5	1.43768	8.99314	267.276	305.559	0.874712
14MM19 02	278.662	7.52674	999.601	489700	3.95554	0.34557	36.579	0.127337	1.21826	2.51524	0.731791	14.3905	5.59323	71.8987	31.2466	159.088	38.6713	393.963	87.6231	12251.9	1.63433	9.53482	287.614	319.186	0.901085
14MM19 03	282.75	4.72296	1024.45	489700	5.24288	1.89617	51.6231	0.382752	1.91184	1.59313	0.528331	12.02	4.63376	66.789	30.2215	162.153	41.8773	462.676	110.622	13045.8	1.95483	12.6238	370.799	427.711	0.866938
14MM19 04	317.072	12.6796	1061.01	489700	2.17614	0.169885	25.2415	0.106731	1.56312	3.09353	1.26273	19.8378	6.78448	87.186	35.3179	170.709	37.7897	358.468	76.783	10039.1	0.837533	3.6841	132.189	121.343	1.08938
14MM19 05	325.342	5.2762	1680.45	489700	6.44528	2.93691	72.8139	1.48105	7.068	4.32819	1.22822	22.8132	8.44132	114.948	50.8805	270.815	65.8636	705.823	160.456	12897.3	2.19357	13.6201	436.555	458.484	0.952171
14MM19 06	296.718	3.16714	1269.54	489700	7.31237	0.346974	57.4912	0.122615	1.15657	2.17218	0.605754	14.946	5.89609	84.1468	38.0409	206.585	52.3325	569.976	134.452	13534.9	2.69861	19.1399	638.393	620.58	1.0287
14MM19 07	355.779	10.4777	2072.72	489700	4.43389	0.417792	44.1017	0.257362	3.76748	6.97214	2.75185	40.8475	14.1164	178.252	70.7148	333.419	71.6286	689.797	147.276	11464.8	1.67406	9.59039	347.187	306.163	1.13399
14MM19 08	287.822	7.14746	1007.63	489700	3.09905	0.447106	33.3806	0.202668	1.67383	2.74294	0.976968	15.7168	5.75865	78.2334	32.8226	164.388	38.5112	392.581	88.2613	11550.7	1.29687	6.92546	203.638	212.576	0.957955
14MM19 09	364.589	4.37485	2238.23	489700	15.5499	35.7869	152.213	7.76521	30.4273	7.86891	1.27943	28.2089	10.5952	157.016	69.9828	366.111	86.4826	903.782	206.55	14785.6	5.02903	30.734	1128.6	1052.12	1.07269
14MM19 10	413.77	9.60075	3269.97	489700	14.1442	0.00747953	60.213	0.142654	2.34007	6.31135	2.19515	46.8781	19.2385	261.208	111.795	535.772	116.255	1099.88	230.895	12758.8	4.56172	16.899	460.088	602.184	0.764031
14MM19 11	247.451	7.43338	764.805	489700	1.59559	0	23.8065	0.0428371	0.848736	2.16312	0.68934	12.2782	4.49392	58.1669	24.6956	122.963	29.045	289.868	64.6468	11581.2	0.916084	4.94818	152.795	167.125	0.914255
14MM19 12	332.007	8.83867	1971.65	489700	5.94361	0.255417	47.5227	0.183867	2.07281	4.82867	1.79632	31.882	12.2863	163.152	67.7373	323.537	70.1891	673.706	142.487	12471.3	2.22123	9.89928	341.979	343.331	0.996062
14MM19 13	309.705	3.27579	1578.08	489700	7.85676	0.529376	56.4354	0.206583	1.78018	3.07242	0.870695	21.6077	8.41543	114.357	50.9594	258.677	59.5598	604.336	136.792	14482.7	2.85353	15.204	465.692	531.77	0.875739
14MM19 14	271.742	6.90139	1146.5	489700	4.66404	0.0346468	34.5898	0.0461412	1.02886	2.09777	0.68773	15.4569	5.98501	83.0486	37.1385	191.033	45.0194	467.272	102.045	12532.9	1.99265	8.95694	247.326	316.28	0.781984
14MM19 15	294.354	7.24747	1406.86	489700	4.39961	0.00421996	45.8687	0.0935077	1.44868	3.61552	1.34119	22.0681	7.86265	107.577	45.745	230.436	53.3625	546.207	122.577	12434.1	1.79212	9.19531	322.102	304.186	1.0589
14MM19 16	320.881	11.8697	1550.58	489700	5.59826	0.0288587	56.0346	0.0984238	1.9113	3.65739	1.54515	23.5193	8.88326	117.181	50.1183	254.364	59.3869	610.674	137.79	12153.1	1.8477	13.5257	497.946	440.523	1.13035
14MM19 17	300.706	6.38013	2073.08	489700	9.09785	0.287186	78.5183	0.168311	1.76559	4.32894	1.37098	29.0602	11.3213	153.991	67.009	340.057	79.0321	817.417	182.282	12830.1	3.35447	19.2844	652.042	631.803	1.03203
14MM19 18	328.725	8.80142	1551.55	489700	4.8103	0.00373762	34.4655	0.0579587	1.29831	3.32432	1.25357	23.0293	9.01543	123.69	52.3967	257.978	56.8836	548.777	119.561	12147.2	1.91078	5.73655	177.267	196.679	0.901302
14MM19 19	269.691	6.77519	790.002	489700	2.61438	2.04907	29.439	0.527886	2.83416	2.23003	0.567835	11.4301	4.42284	57.1195	25.2541	128.343	30.9003	317.61	71.6452	11316.5	1.2576	9.75314	311.775	329.132	0.947263
14MM19 20	352.409	3.21894	1623.59	489700	10.7121	0.0533497	46.1637	0.0351994	0.588842	2.04514	0.450723	16.8557	7.80082	113.821	52.2329	272.555	65.2347	662.613	149.213	14083.2	4.19685	14.1417	308.396	524.5	0.587982
14MM19 21	365.264	12.4474	1538.02	489700	3.19162	0.0280446	31.0071	0.14164	2.48197	5.15605	1.94763	30.1887	10.4048	129.094	53.1401	247.33	54.1119	512.509	110.282	10085.6	1.06526	5.31278	190.955	169.558	1.12619
14MM19 22	333.469	10.0129	1494.82	489700	4.97721	0.826782	42.6498	0.262727	2.10658	3.56646	1.08608	22.1402	8.5431	110.518	49.4505	242.355	57.7108	577.186	129.486	11389.1	1.80547	9.24724	286.09	301.903	0.947622
14MM19 23	389.833	23.1167	1302.98	489700	1.8916	0.0242164	20.7909	0.108844	1.97335	4.19907	1.7878	25.2205	8.94294	110.745	45.4752	209.714	44.7065	421.039	87.6835	9291.88	0.738139	3.13382	108.392	100.502	1.07851
14MM19 24	338.455	8.18111	1515.96	489700	5.20704	0.552471	44.719	0.126032	1.63903	3.5441	1.3406	24.3821	9.19187	118.52	51.1494	248.733	56.3046	558.933	122.17	11470.3	1.86675	7.41714	242.169	249.832	0.969329
14MM19 25	333.453	8.68462	1731.79	489700	5.61441	0.351605	39.047	0.128824	1.80819	3.9288	1.52791	28.6114	10.7006	139.896	60.8167	289.741	63.9415	614.631	131.25	11147.6	1.91806	9.57167	260.294	289.778	0.898253
14MM19 26	354.175	13.0967	1108.48	489700	2.47932	0.485698	28.8021	0.182686	1.88289	3.89945	1.59382	22.7728	7.84887	97.3768	39.6228	183.502	39.4524	369.187	79.6276	10194.5	0.94868	3.38539	122.166	108.764	1.12322
14MM19 27	438.908	18.155	1693.89	489700	3.21095	0.112432	30.3086	0.125051	2.06402	4.57769	1.85889	29.7982	10.9311	141.156	59.4109	278.924	60.3999	564.84	119.249	9190.15	1.01256	5.18492	175.314	156.076	1.12326
14MM19 28	350.773	10.8005	3412.2	489700	5.56249	1.84477	84.0173	0.918342	8.40245	12.9691	4.43013	72.1832	25.3229	303.332	121.222	542.525	115.988	1065.25	216.76	10703.1	1.91728	17.3452	876.121	481.649	1.819
14MM19 29	274.781	8.60791	793.028	489700	1.80823	0.082922	22.542	0.0654624	1.12176	2.03183	0.721967	12.8153	4.79686	62.5446	26.3203	129.734	30.762	306.301	68.1111	11038.6	0.964064	5.15451	140.783	168.308	0.83646
14MM19 30	407.471	9.06516	2372.79	489700	9.03526	49.5716	150.871	10.1437	39.9893	11.1288	2.10713	40.6953	14.7002	193.188	82.6487	396.438	88.3389	834.707	178.141	11903.8	3.00967	11.6206	340.279	363.837	0.935253
14MM19 31	362.531	10.0736	1904.16	489700	4.93206	0.416243	47.306	0.261673	3.46029	6.15265	2.27519	36.1404	12.9377	160.201	65.5565	309.468	68.1868	654.312	140.503	10869.1	1.68565	9.80168	344.055	307.679	1.11823
14MM19 32	380.474	8.58242	2487.69	489700	8.65893	0.0283162	46.6934	0.120671	2.14208	5.36492	1.87279	38.242	15.021	201.13	86.3042	411.275	90.267	855.779	177.723	11910.5	3.07264	13.3632	370.981	453.582	0.817891
14MM19 33	437.845	18.9485	1614.48	489700	2.56899	7.95928	41.7016	2.30041	11.6522	6.46966	1.92069	29.931	10.3084	130.326	55.3169	259.192	55.7427	520.07	111.871	9205.64	0.903749	4.88763	172.122	160.461	1.07267
14MM19 34	299.964	4.72001	1238.83	489700	2.4908	0.2546	31.3056	0.14287	1.5781	3.18051	1.05682	18.7852	6.72763	90.0084	39.324	202.013	48.7795	508.757	116.693	11637.6	1.08932	8.842	270.215	289.908	0.932074
14MM26 01	283.348	12.824	1310.23	489700	3.3441	6.99694	53.6126	2.51675	12.7371	5.99359	1.46449	23.4428	7.8768	101.193	42.2482	209.636	48.4736	486.868	105.395	11296.8	1.54001	8.27114	258.06	257.401	1.00256
14MM26 02	339.637	5.883	3067.57	489700	7.34785	0.107436	68.4664	0.140791	2.6388	7.26126	2.14611	50.2162	19.295	251.774	103.37	488.859	107.247	1018.33	204.386	12619.6	2.71116	17.4254	580.922	569.121	1.02074
14MM26 03	298.688	5.88544	1401.61	489700	6.3365	0.0405969	38.8333	0.050492	1.16978	2.6934	0.744343	18.2791	7.33539	103.186	45.4564	232.093	54.04	551.735	121.469	12370.8	2.76919	8.68224	234.236	312.66	0.74917
14MM26 04	309.681	4.65526	1767.42	489700	8.95243	12.9916	90.6644	4.40231	21.4303	8.19397	2.28605	29.312	10.602	137.959	57.6943	292.269	64.7952	635.074	135.638	13068.9	3.55699	12.0128	352.544	419.991	0.839409
14MM26 05	357.806	7.15521	3256.02	489700	12.6755	0.582696	73.8951	0.261144	2.77048	7.01946	2.08544	50.8079	20.1402	266.119	111.31	529.564	112.63	1068.47	218.34	13681.8	4.33315	22.2259	744.22	742.595	1.00219
14MM26 06	277.688	6.40195	1719.31	489700	4.43888	0.568041	44.8094	0.288541	2.84252	6.38437	2.69622	41.9142	13.9521	155.196	56.6198	250.038	52.7209	513.485	109.08	11851.5	1.84065	10.9632	386.52	351.839	1.09857
14MM26 07	280.844	5.57532	1221.82	489700	3.78035	0.0348743	32.3526	0.063732	1.17316	2.89472	0.940536	17.6192	6.7133	89.0542	38.1628	199.651	47.3963	488.455	110.085	11664.7	1.74078	7.27246	218.044	253.099	0.861496
14MM26 08	259.981	7.67523	962.437	489700	2.52877	0.478755	30.0617	0.217179	1.69823	2.55913	0.76683	14.988	5.59319	73.0494	30.9908	153.747	34.9901	351.405	75.3655	11525.6	1.27399	6.59834	217.389	224.242	0.969438
14MM26 09	272.939	55.7484	1139.24	489700	2.59618	0.0490967	27.767	0.0877265	1.6444	3.85192	1.37973	20.6642	7.21096	89.6168	36.3904	177.413	40.3641	406.58	88.6303	11149.9	1.16441	6.43178	226.768	216.126	1.04924
14MM26 10	259.898	71.0949	982.375	489700	2.93155	1.8384	31.0595	0.530545	3.30409	2.51438	0.8518	14.728	5.53864	72.3505	31.3998	159.24	37.0866	383.925	85.433	11844.8	1.30832	5.77504	174.031	196.432	0.885961
14MM26 11	372.051	19.7402	1536.92	489700	1.81311	0.150907	18.3572	0.122028	2.00366	4.74266	1.70025	29.7023	10.6901	130.931	52.9626	244.48	49.9669	453.303	93.5417	9267.58	0.657347	2.57369	88.3937	82.9579	1.06552
14MM26 12	280.618	6.43024	1373.22	489700	4.67195	0.735391	46.5778	0.281148	2.23306	3.66692	0.977469	20.6952	7.74374	102.056	43.508	222.446	50.8099	520.914	114.599	11882.3	2.1619	9.64414	333.774	318.251	1.04878
14MM26 13	305.322	4.83771	1976.43	489700	8.41538	0.008103	60.9995	0.066542	1.62977	4.53053	1.15881	30.0101	11.7945	157.893	66.3616	321.179	69.7427	670.229	138.655	13478.8	3.15285	16.5363	563.358	551.283	1.0219
14MM26 14	298.444	10.235	1563.51	489700	4.27055	0.0181101	36.5828	0.0832012	1.8104	3.79695	1.29412	24.5688	8.91445	117.925	50.8732	253.305	57.1558	568.593	124.05	11037	1.60991	7.56121	268.023	256.985	1.04295
14MM26 15	273.961	6.9366	1378.43	489700	3.92475	0.0616551	44.9286	0.0908056	1.54398	3.05703	0.992311	19.6199	7.72613	101.722	44.0451	224.069	51.4948	528.021	116.616	11691.5	1.77193	10.0264	376.698	331.084	1.13777
14MM26 16	326.502	89.1785	2527.77	489700	6.02988	0.522706	57.3812	0.321283	3.93177	8.30141	2.46493	49.3002	17.41	220.096	87.8252	407.787	84.1161	781.1	159.381	11588.6	2.0599	9.76482	377.162	314.564	1.199
14MM26 17	296.405	4.26841	1994.63	489700	9.77319	0.00744428	52.7606	0.0581887	1.28388	3.35318	0.907179	27.5446	11.2919	153.634	66.3233	326.48	71.522	686.224	143.708	14990.5	4.2491	17.0398	475.555	579.067	0.821244
14MM26 18	267.666	9.93984	1586.04	489700	2.74012	0.128232	39.2953	0.173457	2.47153	5.25718	1.53803	28.8566	9.9978	125.692	51.3539	253.605	56.3418	561.748	122.832	11631.9	1.21677	9.46325	362.726	296.477	1.22346
14MM26 19	285.945	4.70631	1267.54	489700	4.97769	0.0324137	47.2243	0.0729873	1.30341	2.91829	0.791613	18.7702	7.16985	97.8368	41.8737	208.793	50.1471	502.137	109.247	12027.2	2.24178	12.0016	413.873	407.425	1.01583
14MM26 20	289.61	5.33829	1695.5	489700	7.97316	0.0323396	58.1488	0.0773628	1.48558	3.86611	0.991849	25.7777	10.3697	138.498	58.0071	283.215	65.2223	624.655	131.115	12210.8	3.12063	15.4537	508.997	506.836	1.00426
14MM26 21	315.342	3.6054	2499.46	489700	14.259	2664.21	4185.58	369.903	1203.31	120.678	8.55576	97.1633	20.4267	223.934	87.4386	410.825	92.0188	859.519	177.106	13771.6	5.70734	35.8681	1815.78	950.67	1.91
14MM26 22	285.139	3.26923	1767.78	489700	4.50054	0.153305	51.8441	0.087458	1.21486	3.50407	0.913127	26.4939	10.5268	141.433	59.994	292.115	67.1535	653.081	141.149	13120.5	2.10178	13.8056	444.242	444.782	0.998786
14MM26 23	329.46	3.9897	2705.8	489700	14.7293	145.915	312.699	21.6192	76.0379	13.9953	1.92648	46.7797	17.6012	232.516	95.4591	449.875	100.214	927.629	188.995	13837.9	5.56267	25.7709	864.09	837.914	1.03124
14MM26 24	297.283	9.98883	1711.37	489700	4.78012	0.57873	48.0263	0.249838	2.70731	4.92454	1.64241	31.6221	11.5542	146.928	59.515	282.663	64.5457	618.697	130.579	11427.4	1.84067	10.4936	426.858	312.259	1.367
14MM26 25	302.336	6.56012	1684.38	489700	9.15324	0.18514	57.0895	0.130745	1.47078	3.48257	0.875689	24.1498	9.76598	133.951	57.6785	285.786	66.4345	639.265	138.88	12738.3	3.54621	14.2159	420.518	477.874	0.879978
14MM26 26	315.511	6.39902	1769.54	489700	7.33314	0.0548718	57.5032	0.116485	1.79288	4.39106	1.19753	28.1941	10.6607	142.197	60.9126	295.178	68.9674	680.499	145.183	11940.5	2.8677	16.6437	605.995	520.26	1.16479
14MM26 27	306.39	8.80878	1412.25	489700	3.731	0.0466232	33.829	0.0841571	1.45343	3.19598	1.24531	21.1252	8.37543	112.54	48.188	236.259	55.5767	543.979	118.222	10828.6	1.63941	7.7268	236.174	256.922	0.919241
14MM26 28	322.141	10.6107	1705.73	489700	4.17822	0.0570507	54.1773	0.147451	2.71561	5.81271	2.00841	36.1544	12.3824	155.187	61.9462	281.726	60.849	555.682	116.027	11737.9	1.47839	7.1996	289.727	219.615	1.31925
14MM26 29	284.374	9.88764	1209.12	489700	2.95564	0.175963	32.1842	0.108673	1.58257	3.3921	1.09136	19.0477	7.25663	94.6684	39.715	197.444	47.1287	471.134	103.812	10983.4	1.33364	7.78616	257.713	254.901	1.01103
14MM26 30	322.137	10.7472	1364.59	489700	3.48401	112.53	212.496	18.6338	67.3257	11.1024	1.94404	30.3629	9.84199	122.305	48.566	224.014	49.1035	451.69	93.7221	10549	1.54965	6.74793	252.095	198.384	1.27074
14MM27 01	298.512	7.94686	1695.47	489700	4.41981	0.336737	57.4562	0.221203	2.58802	4.92613	1.86804	31.1027	11.1386	138.615	57.209	275.272	61.36	591.661	126.666	11268.9	1.6365	9.99578	484.537	318.737	1.52018
14MM27 02	293.134	6.99447	1166.24	489700	2.57685	1.92691	32.0655	0.602515	3.33757	3.3307	1.09267	17.6366	6.59776	86.7089	38.0935	191.238	45.0391	449.292	101.723	10889.3	1.09929	5.05079	172.402	176.609	0.976182
14MM27 03	296.129	10.7813	1335.25	489700	2.95114	0.0686123	31.3383	0.0998555	1.56046	3.64967	1.2556	21.8838	8.2472	105.69	43.8996	214.83	47.8378	466.763	99.478	10870	1.19443	5.6521	213.026	189.365	1.12495
14MM27 04	305.897	7.69107	1532.22	489700	5.58138	0.0673464	50.3667	0.0719021	1.60429	3.86246	1.2443	25.4819	9.67628	126.128	52.0901	250.194	54.5642	524.58	109.249	12527.1	2.15688	8.39086	296.063	289.443	1.02287
14MM27 05	370.202	28.3584	1223.85	489700	2.78626	0.495323	23.0664	0.243912	2.02339	3.45289	1.51986	22.8448	7.99887	102.077	42.0089	200.055	42.556	399.227	84.2906	9987.97	1.03945	3.34176	111.346	104.027	1.07036
14MM27 06	395.404	17.4956	1787.96	489700	3.53378	13.4111	68.9322	3.99731	20.1943	8.34046	2.58514	35.3867	12.1756	154.887	62.8249	286.43	59.6972	554.005	115.182	10246.4	1.2455	5.3511	225.55	170.951	1.31939
14MM27 07	303.33	9.54608	1034.6	489700	2.0587	0.188075	27.3722	0.137923	1.65226	3.21035	1.14043	18.6158	6.48897	84.8471	35.2808	169.492	37.5455	361.326	78.898	10747.6	0.867313	3.68875	133.367	123.06	1.08376
14MM27 08	313.298	1174.04	1815.89	489700	7.49835	0.48176	59.4482	0.276019	2.82873	5.47929	1.97782	32.8377	11.9187	152.249	62.0044	295.358	63.5436	604.141	126.417	12759.6	2.13562	9.9473	399.284	327.616	1.21876
14MM27 09	255.629	4.87876	960.276	489700	3.59932	0.0729302	36.842	0.0559199	0.797383	2.09295	0.623394	13.6931	5.22323	71.1	30.7359	157.178	36.2933	367.007	80.0223	12343.3	1.7011	7.32965	246.796	260.423	0.947674
14MM27 10	331.709	14.6089	1021.8	489700	2.09304	0.00487408	26.3845	0.0607513	1.56774	3.46244	1.43279	20.8481	7.40534	91.4183	35.6811	162.736	34.4202	319.955	66.703	10460.6	0.875841	3.29881	138.459	108.962	1.27071
14MM27 11	309.239	8.79608	1386.56	489700	3.48254	0.29721	45.8776	0.196039	2.33136	4.43559	1.56337	25.7969	9.08249	116.656	46.6107	223.547	49.4183	479.052	102.777	11426	1.50468	6.62909	278.545	212.294	1.31207
14MM27 12	316.61	14.9668	1058.96	489700	1.36901	0.0133837	20.6859	0.117971	1.94115	3.93082	1.67485	23.6156	7.86268	94.734	36.5736	168.313	36.0668	340.273	70.6317	10243.9	0.611022	2.75858	114.337	92.0363	1.24231
14MM27 13	342.235	14.3274	1286.79	489700	2.23297	0.0348621	32.9378	0.116388	2.31048	4.71512	1.90828	27.1155	9.13851	112.901	44.5292	206.575	43.8951	411.101	86.9902	10013.1	0.906178	3.99983	194.345	134.459	1.44539
14MM27 14	351.71	15.5748	2167.32	489700	5.26592	0.657843	52.4935	0.354236	3.5308	6.37778	2.53035	39.6444	14.5511	183.849	73.879	345.551	73.4262	693.787	145.256	10804.2	1.72081	8.98743	403.436	277.259	1.45509
14MM27 15	293.975	3.89048	1444.73	489700	5.67483	0.451537	57.4531	0.208877	2.08476	3.38521	1.04849	21.3724	8.06248	108.942	46.2126	234.116	53.8123	542.591	121.141	12164.5	2.22621	13.3211	524.806	447.198	1.17354
14MM27 16	338.638	7.9604	1863.83	489700	5.83989	0.348407	57.5519	0.208411	2.25575	4.85865	1.63272	28.6349	10.6143	141.021	59.9133	300.664	68.5774	678.479	149.387	11174	1.8673	11.5566	477.82	375.679	1.27188
14MM27 17	290.905	7.96476	1382.43	489700	4.40061	0.312726	44.5136	0.168262	2.0858	3.73732	1.37092	23.1271	8.31405	109.737	44.8079	221.459	49.7528	487.611	105.96	11270.2	1.63177	10.6283	445.231	334.724	1.33014
14MM27 18	344.62	16.0779	1814.33	489700	4.81847	0.362838	49.38	0.23087	3.19256	5.7627	2.27528	35.7366	12.1862	152.381	61.1918	288.948	62.6459	593.757	126.028	10519.9	1.29794	6.6823	297.429	206.989	1.43694
14MM27 19	329.356	12.39	984.459	489700	2.36227	2.84463	31.429	0.690779	3.38282	3.29266	1.15179	18.5701	6.54512	82.2078	34.2243	161.511	36.4812	350.003	75.7688	10262	1.02042	4.47426	137.259	143.325	0.957673
14MM27 20	314.449	13.7993	1628.64	489700	2.29077	0.0560295	31.3761	0.161332	3.21749	6.5339	2.38347	36.0326	12.1167	143.672	57.9799	262.416	57.1294	544.041	116.484	10737.6	0.783335	6.59455	256.442	199.257	1.28699
14MM27 21	356.043	20.1253	964.244	489700	2.89044	0.0194945	16.5158	0.0762335	1.405	2.9434	1.28262	18.8061	6.55333	81.535	33.8892	158.266	35.2227	343.284	79.6242	11369.2	0.997539	6.46458	92.4176	231.466	0.39927
14MM27 22	333.003	10.8165	1136.36	489700	2.42855	0.00543346	32.8606	0.0662247	1.58925	3.85808	1.45132	23.6748	8.08958	100.752	40.8875	188.947	40.4079	381.316	81.0375	10606.3	1.01998	3.42333	133.263	112.3	1.18667
14MM27 23	331.747	10.2079	1059.66	489700	2.30499	0.0668565	33.596	0.148626	1.68131	3.66123	1.28089	22.3755	7.78739	95.3494	38.4083	174.967	37.5702	346.77	72.9516	10804.4	0.990596	3.59704	141.155	113.524	1.24339
14MM27 24	387.638	17.2523	1319.94	489700	2.0256	0.0314555	20.2144	0.0948412	1.48129	3.90133	1.58603	24.007	8.70569	111.294	47.0347	222.209	48.5648	462.924	98.1655	9168.99	0.781864	3.42669	112.936	107.932	1.04635
14MM27 25	400.755	11.8083	1821.01	489700	5.51802	0.00587522	39.4517	0.103667	2.16993	5.05611	1.89415	33.3929	12.2289	155.859	65.9397	307.712	66.5278	632.568	133.183	11094.8	2.00965	8.16495	247.097	256.109	0.964811
14MM27 26	329.053	19.4216	1698.68	489700	6.76903	5.99056	83.5123	1.9539	10.1988	6.48319	1.84404	33.4298	11.7075	147.276	60.0838	279.437	60.9681	576.853	120.475	12033.2	2.27887	11.3488	468.851	349.708	1.34069
14MM27 27	346.66	10.8031	1856.66	489700	5.10341	0.0304084	48.0807	0.149622	2.65847	5.89459	2.1585	35.751	12.598	156.505	64.789	304.058	68.1443	656.541	138.781	10735.1	1.61524	8.91365	335.981	283.572	1.18482
14MM27 28	381.896	16.3939	1440.89	489700	6.55963	0.70889	39.1121	0.404863	3.59689	4.78935	1.84086	26.2085	9.33098	118.642	50.2277	238.776	52.8561	518.394	111.437	10518.7	1.58415	7.32708	248.591	214.117	1.16101
14MM27 29	409.356	18.3872	1129.46	489700	2.3465	0.0342965	19.8039	0.103289	1.54474	3.59218	1.56956	21.0703	7.28947	93.1572	39.6253	185.101	40.3451	380.129	82.5505	9105.98	0.675133	2.66119	97.6762	86.9042	1.12395
14MM27 30	372.105	11.4916	1861.34	489700	11.4519	0.0536528	51.9584	0.0729846	1.46196	3.93362	1.39847	30.112	11.5893	155.116	67.0399	314.05	69.0923	651.728	137.182	12163.5	3.50889	13.9568	317.436	434.643	0.730336
14MM27 31	361.949	13.3832	1183.86	489700	2.35909	0.676848	32.2865	0.287134	2.78601	4.61091	1.63763	24.9438	8.56037	105.927	43.4103	197.185	41.5785	386.446	82.4	10168.1	1.01327	3.94685	155.429	124.929	1.24414
14MM27 32	306.176	8.91904	1827.11	489700	1.71179	0.0166494	35.5261	0.246445	4.24837	7.99772	3.05921	42.1606	14.1795	165.87	66.0045	294.51	62.7406	580.194	123.1	10778.6	0.754408	5.807	275.279	178.68	1.54063
14MM27 33	288.904	13.8213	1499.87	489700	6.51766	0.022018	61.237	0.0999718	1.74877	4.05851	1.19088	25.0054	9.3135	118.093	50.9867	247.482	56.5482	555.416	118.107	11866.7	2.50368	17.2266	663.523	481.134	1.37908
14MM27 34	332.91	5.83776	1666.31	489700	5.47835	0.0244463	53.7797	0.127638	1.76787	4.72584	1.67109	30.3227	11.1164	142.063	59.9979	278.506	60.1267	567.342	119.13	11648.9	1.87445	8.17302	299.908	261.524	1.14677
14MM27 35	417.85	18.8101	1355.58	489700	2.22527	0.0128721	20.5361	0.103825	1.87654	4.13784	1.61992	24.7789	8.65624	111.358	47.3645	223.897	48.925	463.565	99.9722	8868.71	0.847531	3.37778	111.881	112.769	0.992128
14MM27 36	373.275	23.7729	1001.29	489700	2.0307	0.0259812	18.9589	0.0964071	1.64868	3.59924	1.49798	20.3672	7.06722	86.8801	35.9401	165.145	35.2117	336.605	72.8721	9393.36	0.661229	2.43802	90.2237	75.469	1.19551
14MM37 01	263.286	4.9619	980.039	489700	4.42511	71.8348	208.596	21.5176	94.0996	19.4939	2.38586	26.6939	6.12325	67.8502	28.2124	144.307	35.1291	374.322	83.0173	11456	1.88841	11.3167	310.23	376.981	0.822934
14MM37 02	290.43	5.83945	1348.48	489700	5.4428	14.1331	76.4597	4.17575	17.3038	5.71262	1.12532	20.9551	7.37859	95.0759	41.1737	201.895	47.8517	490.093	103.094	11025.6	2.10249	12.5498	400.219	412.827	0.969461
14MM37 03	261.561	4.18628	904.592	489700	2.88909	12.2311	53.7479	3.29462	13.6547	3.85594	0.747271	12.7405	4.67948	61.9204	26.4348	133.444	32.6517	336.383	74.0035	10972.1	1.61264	8.61938	224.425	300.83	0.74602
14MM37 04	290.027	5.97493	1475.9	489700	6.49189	0.593957	41.7102	0.24021	2.19282	3.31311	0.895369	21.0154	7.98877	104.918	44.3213	223.208	50.6231	511.942	108.888	11288.3	2.58374	13.9372	411.705	460.171	0.894679
14MM37 05	305.027	11.7369	1582.14	489700	3.64632	0.147168	31.0591	0.186204	2.28938	4.20326	1.4928	24.4858	8.96966	115.121	46.5944	228.504	51.6735	517.871	109.894	9063.97	1.30292	11.9829	372.612	408.149	0.912932
14MM37 06	277.206	6.62379	1175.48	489700	3.81418	0.134389	33.6436	0.0805513	1.13775	2.42038	0.707999	15.4473	6.02961	78.1138	34.6303	175.127	41.4337	426.691	94.5189	10806.2	1.62705	9.0844	279.713	304.422	0.918832
14MM37 07	273.187	24.7046	1067.31	489700	2.58937	89.2995	249.856	29.8149	132.749	28.5495	3.20547	36.3321	8.05217	81.0627	32.2124	155.088	36.3616	370.073	82.0609	10042.4	1.19747	6.41062	152.155	172.004	0.8846
14MM37 08	262.001	4.81657	998.975	489700	3.65944	0.283578	34.2432	0.150483	1.1735	2.02679	0.610387	12.8824	4.67273	67.1597	28.4382	149.496	36.1935	374.52	86.3193	10971	1.60087	8.84254	267.042	303.097	0.881044
14MM37 09	260.636	5.77536	830.217	489700	2.04231	0.161096	20.7037	0.0858931	1.09212	2.107	0.628664	12.6914	4.47855	57.0915	24.1316	122.504	28.5913	296.96	66.0364	10473.1	1.10217	7.86588	205.675	277.195	0.741987
14MM37 10	263.734	5.33959	1036.81	489700	2.70836	0.794931	27.0987	0.284752	2.06485	2.47958	0.700755	14.2933	5.39213	71.1764	30.7077	154.802	36.2474	371.204	82.9306	10580	1.32453	7.47038	220.915	258.174	0.855682
14MM37 11	312.976	4.72664	1423.97	489700	4.49	0.397516	34.9305	0.228286	1.8291	2.60519	0.728443	16.941	6.84997	95.386	42.3532	219.027	52.7109	545.752	119.741	11305.4	1.97055	10.5229	342.652	360.49	0.950519
14MM37 12	296.231	9.88614	1641.08	489700	4.34086	0.0401437	47.0313	0.132097	2.1573	4.19162	1.49009	24.9896	9.52312	118.592	49.6008	241.442	54.4224	546.534	116.386	9761.15	1.39109	10.2459	441.002	311.093	1.41759
14MM37 13	258.749	5.50115	1080.81	489700	2.97818	8.32951	49.1301	2.47411	10.9517	3.93906	0.796165	17.4841	5.94045	77.3278	33.0528	165.226	38.1035	392.154	85.2091	11234.8	1.57965	8.31573	226.165	294.221	0.768693
14MM37 14	266.124	5.20778	1016.03	489700	3.51515	0.050739	29.9502	0.051691	0.948355	1.92063	0.596862	12.8699	5.04533	67.1078	29.5018	152.938	36.5826	389.035	86.9822	11387.3	1.54643	8.02171	252.847	269.773	0.937261
14MM37 15	258.606	4.81911	1107.97	489700	3.90509	0.00385478	34.0653	0.0387997	1.11388	2.21611	0.668737	15.3225	5.86197	76.778	33.0317	166.466	38.765	395.704	85.7291	11088.5	1.93846	10.4025	314.101	354.461	0.886137
14MM37 16	251.833	6.21261	808.332	489700	2.50713	0.161305	27.0591	0.077634	0.890009	1.63801	0.550735	10.5226	3.96013	53.9171	23.5914	119.186	28.755	300.879	68.2795	10931.6	1.25596	6.32624	186.293	216.422	0.860785
14MM37 17	275.667	10.9399	995.288	489700	2.16699	68.8341	189.459	22.2101	100.296	21.5744	2.67705	31.2278	7.53075	77.7195	30.2396	143.17	32.6714	325.772	71.0759	9832.88	0.96826	10.1218	219.114	273.052	0.802463
14MM37 18	247.12	10.4426	748.5	489700	2.24693	1.81363	22.0701	0.313527	1.5102	1.79404	0.471831	10.1619	3.95558	50.4331	21.9023	112.077	26.7464	278.283	62.1804	11018.9	1.18497	6.39414	175.763	215.897	0.814105
14MM37 19	267.475	8.38441	1248.41	489700	2.75744	0.105288	36.5807	0.144684	1.93273	3.57429	1.16668	20.5343	7.40788	96.097	40.4183	202.292	47.2064	485.495	105.444	11412.8	1.24828	8.11044	278.231	251.804	1.10495
14MM37 20	306.887	10.3558	1585.34	489700	1.97869	0.00933437	31.7816	0.0852772	1.55049	3.27591	2.00072	24.867	9.17006	119.246	50.8237	254.936	61.0961	637.685	146.996	8374.55	0.666843	7.0402	301.12	218.478	1.37826
14MM37 21	288.615	6.65731	1395.98	489700	4.63831	0.0225564	53.7169	0.0874789	1.71988	4.05691	1.32993	24.1936	8.9058	109.725	45.3099	224.427	51.8605	521.7	113.355	10917.3	1.97495	12.2812	481.524	378.592	1.27188
14MM37 22	285.971	5.54192	1068.92	489700	2.71912	2.14274	28.1897	0.625484	3.39829	2.80249	0.902402	17.4716	6.5424	84.0973	34.9898	170.77	39.7495	399.997	86.3161	11296	1.28879	8.22472	231.157	283.075	0.816595
14MM37 23	264.169	3.98247	876.566	489700	3.99595	0.18266	35.6108	0.109673	0.995711	1.68187	0.469268	10.3985	4.29424	58.9691	26.7234	142.621	35.5009	381.695	87.7603	12301.9	1.76739	13.6796	427.161	431.838	0.989172
14MM37 24	271.067	4.46982	1180.37	489700	5.06692	1.49068	47.6302	0.514636	3.05086	2.81092	0.657751	16.4277	6.35208	87.1476	37.9721	194.946	46.8936	485.32	107.772	12094.2	2.38462	13.6288	429.758	451.504	0.951838
14MM37 25	269.248	5.52365	1276.22	489700	4.52848	0.0145238	51.7702	0.0736302	1.60352	3.3792	0.855656	20.5714	7.61715	100.096	42.3611	206.509	48.1787	482.816	103.536	11693.7	1.9922	11.9744	498.594	382.372	1.30395
14MM37 26	254.811	3.49219	959.551	489700	3.68064	4.07302	46.1508	1.08187	4.92146	2.71873	0.615566	13.6193	5.18341	70.7409	30.8307	156.98	38.1426	395.476	87.0722	12260.9	1.96047	11.0134	331.868	382.391	0.867877
14MM37 27	319.67	8.51205	1497.55	489700	4.72858	2.72497	40.0232	0.634201	3.87342	4.27617	1.31984	24.4244	8.96667	116.92	48.9469	240.436	56.0088	563.05	122.88	11250.6	1.89429	22.7838	469.703	501.624	0.936364
14MM37 28	293.533	79.1557	1408.44	489700	7.27055	0.576676	53.7838	0.222381	1.6416	2.71769	0.663242	17.9337	7.16632	98.0037	44.2352	232.055	56.2946	586.624	133.768	13054.8	2.84217	16.1363	512.28	539.706	0.949182
14MM37 29	271.877	4.17063	1046.67	489700	5.03307	1.94171	47.8288	0.634217	3.16618	2.3235	0.624577	13.6396	5.41674	73.5173	33.233	172.328	42.3618	443.148	100.339	13035.8	2.39325	12.8751	385.703	443.971	0.868759
14MM37 30	256.405	3.92814	900.234	489700	4.23448	11.3898	64.4475	2.89545	11.7172	3.34514	0.677268	12.4833	4.60957	61.7618	28.0679	148.753	37.4953	399.065	92.8985	13184.1	2.0408	13.3261	357.573	431.548	0.828583
14MM37 31	275.291	6.11919	1273.15	489700	5.37235	109.63	317.727	36.414	164.219	35.8139	3.60325	47.0873	10.4248	106.003	41.0547	197.255	47.5373	485.457	108.09	12124.2	2.41213	15.6777	504.669	516.334	0.977409
14MM37 32	332.668	6.11241	1976.6	489700	4.34276	1.39856	39.3853	0.524368	3.68403	5.32052	1.28446	31.0241	12.0489	157.112	66.3643	320.489	72.9016	714.423	150.571	10815.6	1.70367	12.316	403.483	402.521	1.00239
14MM37 33	310.373	3.15677	2072.09	489700	7.4921	0.976737	43.7895	0.318261	2.76395	4.23169	1.01235	28.9181	11.8724	160.322	69.6517	341.926	78.4935	763.707	162.353	13841.8	3.15313	19.2506	479.881	664.483	0.722187
14MM37 34	255.54	5.51375	965.607	489700	3.62317	0.206587	29.9431	0.0907248	1.05379	1.92233	0.391381	14.2729	5.71825	76.4833	32.2088	158.204	37.2649	366.843	76.2837	12846.9	2.454	7.32022	221.119	249.018	0.887964
14MM37 35	257.917	10.4235	763.776	489700	1.87142	0.434492	24.6274	0.0914554	0.969611	1.89243	0.662541	11.538	4.42118	57.6547	24.5968	122.899	29.0949	297.612	65.6847	11030.9	0.993471	5.4658	162.86	175.614	0.927379
14MM37 36	287.826	9.54324	1225.08	489700	1.96599	1.65786	25.3931	0.625365	4.36914	4.78341	1.43693	24.3836	8.4382	100.063	40.6611	193.09	44.4472	436.735	94.8329	10164	1.04664	10.2763	273.345	361.403	0.756343
14MM18 01	357.606	4.83098	1913.55	489700	13.9466	5.38454	107.282	1.18904	5.78733	4.15339	1.11562	23.2558	9.085	120.437	55.1923	294.77	75.814	831.371	202.364	12925.6	4.61197	41.6514	1927.7	1404.58	1.37244
14MM18 02	284.597	4.2364	1158.17	489700	6.20795	0.512437	51.4292	0.0928461	1.00733	2.05588	0.667315	13.1937	5.28652	74.6059	33.6273	184.295	46.4476	512.824	124.208	12557.3	2.12665	18.1667	549.415	559.776	0.981491
14MM18 03	288.446	3.75413	981.854	489700	5.74082	9.19269	64.7092	1.96106	7.86001	2.54565	0.717694	11.1544	4.26663	59.8938	28.3599	158.317	39.9117	446.788	107.447	13460.8	2.11516	12.5844	406.305	436.054	0.931775
14MM18 04	260.702	5.30266	837.925	489700	3.92435	1.35928	55.2451	0.439813	2.90252	3.72132	0.711072	17.0825	5.7698	68.2702	26.1199	124.944	29.7774	306.7	69.9234	13787.7	2.12382	10.436	678.384	1277.24	0.531133
14MM18 05	348.275	6.87599	2392.49	489700	11.9287	1.07634	81.2725	0.54072	4.80393	6.86728	2.22245	38.7484	13.7293	176.117	73.6169	371.294	87.6341	913.728	213.032	12061.8	3.19872	35.4277	1417.7	1012.71	1.39991
14MM18 06	320.039	5.6034	1430.57	489700	5.25388	7.5739	63.1725	1.71923	7.32692	4.60196	1.37865	21.4525	7.74085	100.75	44.0918	229.051	55.4399	591.859	137.571	12370.1	1.8285	10.8935	382.534	375.065	1.01992
14MM18 07	384.743	593.25	1928.98	489700	21.4147	0.522155	88.4146	0.292437	2.11989	3.11274	0.824366	20.3312	7.92023	112.107	53.7933	304.32	79.5283	898.403	224.693	13327.3	4.23127	54.0318	2390.21	1636.9	1.46021
14MM18 08	316.438	25.7456	2089.72	489700	15.6035	5.77005	88.2284	2.00533	10.1793	8.03257	2.3249	38.5869	13.3112	169.455	68.5182	331.361	75.845	756.994	163.962	11295.3	2.49198	21.4806	2221.25	681.871	3.25758
14MM18 09	329.021	4.93803	2167.78	489700	8.88997	7.03373	79.15	2.47133	12.8076	8.26196	1.70019	35.8936	12.0136	158.495	66.3645	334.818	79.5738	830.547	188.616	12011.2	2.24436	22.3675	1167.77	693.527	1.68382
14MM18 10	330.354	4.30514	1488.47	489700	6.96783	15.5219	88.9418	4.18282	17.9779	5.49474	1.09831	18.6401	6.87522	94.664	43.5867	239.36	61.6148	687.219	163.211	12862.3	2.25915	20.6013	614.365	609.155	1.00855
14MM18 11	332.103	64.4364	1623.17	489700	9.09546	5.64788	77.359	1.47683	6.2365	3.62117	1.06866	19.1295	7.29533	98.1533	46.2466	253.501	64.8847	734.852	178.037	12552.2	2.27236	26.9641	957.637	743.154	1.28861
14MM18 12	329.345	6.42403	1525.16	489700	10.4791	20.7049	105.263	4.85929	20.7717	5.95572	1.27699	21.4964	7.60468	100.085	45.2665	238.885	58.9159	645.167	152.119	12171.3	2.70542	27.1884	964.34	769.552	1.25312
14MM18 13	313.197	10.5508	1567.67	489700	3.42529	0.363435	40.9439	0.232569	2.55407	4.49001	1.63638	25.8434	8.89989	119.423	50.3228	248.66	57.6491	587.911	131.451	10273.8	1.13588	9.41605	423.952	293.224	1.44583
14MM18 14	352.551	21.6746	1589.31	489700	10.6405	9.88953	88.1366	3.54468	15.4555	6.39176	0.62335	19.289	6.89126	93.9717	44.2581	251.585	65.1497	750.293	187.746	13098.7	2.65468	24.1813	868.108	755.472	1.14909
14MM18 15	345.142	11.8419	1915.12	489700	9.98746	1.3419	78.3563	0.368496	2.82007	3.18927	0.911547	22.5108	8.62484	119.472	55.0356	302.348	76.607	845.467	208.979	13107.1	2.87097	34.9582	1235.79	1036.67	1.19208
14MM18 16	348.459	8.00522	1928.15	489700	8.68598	51.3741	270.021	36.1429	186.675	46.4581	2.62653	48.1082	11.6	134.17	57.8421	303.641	75.2346	825.752	193.899	12038.4	2.65034	20.5252	732.545	648.309	1.12993
14MM18 17	350.788	23.3475	1443.63	489700	2.6436	0.539768	33.4037	0.248278	2.22751	4.47908	1.63161	27.9436	9.41104	119.083	49.2381	230.955	50.2163	473.282	100.905	9991.43	0.909292	4.76002	180.325	139.45	1.29312
14MM18 18	354.044	6.4202	2110.48	489700	9.86763	0.771715	80.7562	0.296146	2.9622	4.89136	1.6215	30.0795	11.3375	151.988	65.7937	328.85	78.7233	825.127	184.928	12066.2	2.45975	26.5943	1044.53	760.194	1.37403
14MM18 19	299.357	4.38933	1168.9	489700	5.77285	1.60526	59.001	0.424791	2.19032	2.09595	0.667988	14.2012	5.60883	75.7908	35.2567	190.633	48.3037	527.221	125.536	12344.4	2.07851	16.5783	589.614	560.343	1.05224
14MM18 20	335.707	6.19422	1408.11	489700	5.5239	4.64873	59.1776	1.18414	5.75486	3.98855	1.23141	22.1149	7.90017	103.286	46.7488	236.138	56.3293	575.13	132.548	11839.1	2.05358	10.5978	358.751	359.105	0.999015
14MM18 21	390.828	14.4615	1531.31	489700	3.0242	0.00533598	27.2389	0.0860042	1.67437	4.13878	1.71349	25.8261	9.37323	125.239	53.849	257.231	57.5415	555.363	117.619	9498.24	1.13859	4.88783	171.301	166.457	1.0291
14MM18 22	285.503	74.1631	938.823	489700	4.63683	6.77249	52.4634	1.66851	7.03718	3.06323	0.84112	13.7675	4.84035	61.6059	27.5319	146.964	37.6227	414.396	100.113	12890.3	1.66015	10.7221	316.558	374.402	0.845504
14MM18 23	287.801	6.65741	806.586	489700	2.41929	0.776048	27.3233	0.200631	1.27205	1.48897	0.427258	9.6218	3.89284	54.5513	25.008	132.581	33.9388	362.736	83.2309	12371.6	1.11831	7.44286	212.883	265.621	0.801457
14MM18 24	389.749	8.28187	1986.91	489700	13.5177	0.208498	63.6382	0.1705	1.61432	3.58206	1.20678	25.0472	10.156	138.758	64.4898	332.263	81.1569	849.39	195.72	12326.3	3.81364	23.2671	717.638	761.695	0.942159
14MM18 25	305.664	2.71813	1294.45	489700	7.55523	0.00682194	43.866	0.0501955	1.04341	2.44683	0.616222	17.2483	6.86575	95.8126	43.352	218.449	52.1206	520.384	115.589	14280.9	3.14683	11.6068	308.253	412.071	0.748057
14MM18 26	324.501	7.25173	1134.47	489700	5.09843	6.605	59.8774	1.61885	7.19352	3.9088	0.99001	17.4175	6.30599	82.2729	36.9286	188.261	46.4724	486.972	112.501	11899.5	1.79255	12.1952	385.162	388.195	0.992187
14MM18 27	311.73	56.1251	1212.73	489700	8.37751	7.00666	65.5754	2.17819	10.1305	5.27423	0.989921	19.4553	6.61444	85.3665	37.9471	199.994	50.0662	535.539	125.968	12087.6	1.92507	28.1908	621.023	442.009	1.405
14MM18 28	305.149	6.39398	1521.82	489700	6.51481	28.2177	123.131	7.98085	35.5249	9.38365	1.62216	26.2956	8.85295	109.664	48.9567	251.807	62.2442	656.604	155.449	12064.2	2.31954	20.4573	663.579	608.909	1.08978
14MM18 29	343.493	14.285	1703.72	489700	9.93627	0.369202	56.0212	0.225509	2.52036	4.39273	1.37037	24.7884	9.44202	123.511	55.1416	278.764	68.4143	719.072	166.31	11261.2	3.74177	22.4661	737.327	654.554	1.12646
14MM18 30	337.98	11.5523	1675.97	489700	8.35402	3.06986	62.0189	1.0978	6.62241	5.15386	1.48462	25.8011	9.31499	121.451	54.2649	277.069	68.2753	720.542	166.928	12553.7	2.77094	26.0071	767.557	671.693	1.14272

## Sheet: S2 Zircon U-Pb ages
Table S2. LA-ICP-MS zircon U-Pb dating results for intrusive rocks from the Zhegu, Wengmunong, and Dulu plutons in the central Lhasa subterrane.
Spot	Th	U	Pb	Th/U	Common-Pb corrected isotopic ratios (± 1σ)						Common-Pb corrected isotopic ages (± 1σ)
	ppm	ppm	ppm		Pb207/Pb206	± 1σ	Pb207/U235	± 1σ	Pb206/U238	± 1σ	Pb207/Pb206	± 1σ	Pb207/U235	± 1σ	Pb206/U238	± 1σ	Concordance
14RD01, Monzogranite, weighted mean age: 156 ± 1 Ma (16 spots, MSWD = 0.89)
14RD01 01	261.563	260.1	8.21856	1.00562	0.04846	0.00146	0.16412	0.00528	0.02451	0.00028	122	54	154	5	156	2	0.987097
14RD01 02	306.126	284.543	9.37664	1.07585	0.04874	0.00492	0.16323	0.01632	0.02429	0.00034	135	226	154	14	155	2	0.993528
14RD01 03	301.592	327.548	10.1903	0.920756	0.04883	0.00149	0.16459	0.00498	0.02454	0.00027	140	50	155	4	156	2	0.993569
14RD01 04	280.401	281.965	8.9552	0.994452	0.05101	0.0016	0.17257	0.00554	0.02453	0.00025	241	55	162	5	156	2	0.962264
14RD01 05	663.18	613.798	20.5783	1.08045	0.05171	0.0011	0.18044	0.00438	0.02524	0.0003	273	34	168	4	161	2	0.957447
14RD01 06	283.209	270.555	8.60492	1.04677	0.04642	0.00282	0.15587	0.00923	0.02435	0.00032	20	133	147	8	155	2	0.94702
14RD01 07	263.139	239.874	7.85528	1.09699	0.04783	0.00144	0.16163	0.00495	0.0245	0.00027	91	51	152	4	156	2	0.974026
14RD01 08	235.529	244.7	7.80056	0.962524	0.04737	0.00301	0.15874	0.00988	0.0243	0.00031	68	141	150	9	155	2	0.967213
14RD01 09	362.112	388.873	12.5384	0.931183	0.04722	0.0028	0.15726	0.00915	0.02415	0.00027	60	131	148	8	154	2	0.960265
14RD01 10	473.553	460.355	14.9728	1.02867	0.0485	0.00095	0.16489	0.00335	0.02459	0.00023	124	30	155	3	157	1	0.987179
14RD01 11	355.267	628.621	97.6661	0.565153	0.08197	0.00114	1.50107	0.04322	0.13173	0.00338	1245	25	931	18	798	19	0.846154
14RD01 12	235.185	263.08	8.31915	0.893966	0.05111	0.00184	0.17383	0.00668	0.02449	0.00026	246	69	163	6	156	2	0.956113
14RD01 13	272.376	271.169	8.73166	1.00445	0.04841	0.00161	0.16429	0.00551	0.02461	0.00027	119	58	154	5	157	2	0.980707
14RD01 14	578.427	430.023	13.8233	1.34511	0.04911	0.00138	0.15784	0.00449	0.0233	0.00024	153	47	149	4	148	1	0.993266
14RD01 15	311.23	330.006	10.2575	0.943102	0.04741	0.00123	0.16035	0.00437	0.02453	0.00034	70	39	151	4	156	2	0.967427
14RD01 16	253.429	260.362	8.58001	0.973373	0.0536	0.01459	0.17368	0.04711	0.0235	0.00053	354	504	163	41	150	3	0.916933
14RD01 17	294.114	305.738	9.74421	0.961982	0.05022	0.00151	0.16881	0.00489	0.02443	0.00023	205	50	158	4	156	1	0.987261
14RD01 18	246.211	254.141	8.11595	0.968797	0.04859	0.00144	0.16408	0.0047	0.02459	0.00028	128	46	154	4	157	2	0.980707
14RD04, Dioritic enclave, weighted mean age: 153 ± 2 Ma (12 spots, MSWD = 3.6)
14RD04 01	919.05	634.067	24.4425	1.44945	0.04824	0.00363	0.1655	0.01231	0.02488	0.00029	111	169	156	11	158	2	0.987261
14RD04 02	754.061	746.702	24.3306	1.00986	0.05153	0.00123	0.17461	0.00411	0.02459	0.00019	265	40	163	4	157	1	0.9625
14RD04 03	3035.56	1381.2	57.621	2.19777	0.04605	0.0038	0.1498	0.01227	0.02359	0.00022		181	142	11	150	1	0.945205
14RD04 04	1319.4	832.658	29.5499	1.58457	0.05026	0.0011	0.16699	0.00386	0.02411	0.00022	207	37	157	3	154	1	0.980707
14RD04 05	2252.46	1161.15	46.2208	1.93985	0.05799	0.00094	0.19592	0.00343	0.0245	0.00021	529	23	182	3	156	1	0.846154
14RD04 06	2809.43	1410.05	55.6369	1.99244	0.05526	0.00107	0.1828	0.0035	0.024	0.00017	423	30	170	3	153	1	0.894737
14RD04 07	660.595	508.683	17.7112	1.29864	0.05705	0.00144	0.18983	0.00501	0.02411	0.0002	493	44	176	4	154	1	0.866667
14RD04 08	920.211	757.386	25.6546	1.21498	0.05026	0.00102	0.16942	0.00418	0.02437	0.00025	207	38	159	4	155	2	0.974522
14RD04 09	745.513	579.151	20.0139	1.28725	0.04609	0.00215	0.15305	0.00691	0.02408	0.00027	3	100	145	6	153	2	0.946309
14RD04 10	589.766	603.232	19.3624	0.977677	0.0494	0.00099	0.16614	0.0041	0.02437	0.00035	167	32	156	4	155	2	0.993569
14RD04 11	1691.05	946.743	38.2807	1.78618	0.06697	0.0103	0.21538	0.03294	0.02332	0.00038	837	341	198	28	149	2	0.717579
14RD04 12	802.053	595.555	20.8686	1.34673	0.04605	0.00247	0.15182	0.00796	0.02391	0.00026		116	144	7	152	2	0.945946
14RD04 13	758.709	592.889	20.2775	1.27968	0.04651	0.0026	0.15197	0.00835	0.0237	0.00025	24	122	144	7	151	2	0.952542
14RD04 14	1295.19	891.262	41.9447	1.45321	0.05312	0.00688	0.17668	0.02277	0.02412	0.0003	334	293	165	20	154	2	0.931034
14RD04 15	4298.02	1866.79	77.4294	2.30236	0.04676	0.00299	0.15294	0.00968	0.02372	0.00022	37	141	145	9	151	1	0.959459
14RD04 16	621.697	572.458	23.5983	1.08601	0.04605	0.05234	0.19022	0.21496	0.02996	0.00367		1329	177	183	190	23	0.929155
14MM34, Granodiorite, weighted mean age: 145 ± 1 Ma (17 spots, MSWD = 2.2)
14MM34 01	322.829	354.796	10.7367	0.909902	0.0497	0.00142	0.16276	0.00458	0.02379	0.00024	181	47	153	4	152	1	0.993443
14MM34 02	289.003	428.821	12.0205	0.673949	0.04739	0.00112	0.15064	0.00357	0.02305	0.00022	69	38	142	3	147	1	0.965398
14MM34 03	404.689	467.641	13.5831	0.865384	0.05036	0.00122	0.15836	0.00379	0.02283	0.00024	212	36	149	3	146	2	0.979661
14MM34 04	573.524	657.807	19.0152	0.871873	0.05145	0.00127	0.16058	0.00406	0.02259	0.00019	261	43	151	4	144	1	0.952542
14MM34 05	295.878	319.462	10.1227	0.926174	0.04797	0.00379	0.15308	0.01194	0.02314	0.0003	98	177	145	11	147	2	0.986301
14MM34 06	438.329	447.414	13.8344	0.979693	0.04949	0.00425	0.15118	0.01285	0.02215	0.00028	171	195	143	11	141	2	0.985915
14MM34 07	300.948	509.928	13.7449	0.590178	0.04942	0.00123	0.15419	0.00392	0.0226	0.00023	168	41	146	3	144	1	0.986207
14MM34 08	366.324	396.371	11.8013	0.924193	0.05178	0.00137	0.16225	0.00432	0.02271	0.00022	276	43	153	4	145	1	0.946309
14MM34 09	321.34	378.437	11.02	0.849123	0.04992	0.00145	0.15665	0.00419	0.02282	0.00021	191	45	148	4	145	1	0.979522
14MM34 10	387.241	436.12	12.7645	0.887923	0.05124	0.0012	0.16087	0.00366	0.02275	0.0002	252	36	151	3	145	1	0.959459
14MM34 11	377.676	415.297	11.8749	0.909412	0.05174	0.00147	0.15678	0.00422	0.02199	0.00024	274	42	148	4	140	2	0.944444
14MM34 12	259.486	421.741	11.3611	0.615273	0.04731	0.00131	0.1462	0.00386	0.02241	0.00024	65	42	139	3	143	1	0.971631
14MM34 13	343.851	389.404	12.2886	0.883018	0.04925	0.00338	0.1568	0.01067	0.02309	0.00022	160	156	148	9	147	1	0.99322
14MM34 14	519.081	567.258	17.0055	0.91507	0.05069	0.00241	0.16006	0.00743	0.0229	0.00022	227	112	151	7	146	1	0.96633
14MM34 15	366.451	390.259	11.2938	0.938993	0.05037	0.00286	0.15349	0.00853	0.0221	0.00026	212	131	145	8	141	2	0.972028
14MM34 16	418.481	372.785	11.6169	1.12258	0.05062	0.00136	0.16135	0.00436	0.0231	0.00026	224	42	152	4	147	2	0.966555
14MM34 17	331.627	363.962	10.4415	0.911157	0.0508	0.00137	0.15765	0.00431	0.02251	0.00024	232	44	149	4	143	1	0.958904
14MM34 18	363.933	456.616	12.9328	0.797022	0.0501	0.00115	0.15706	0.0039	0.02266	0.00022	200	39	148	3	144	1	0.972603
14MM19, Monzogranite, weighted mean age: 146 ± 1 Ma (29 spots, MSWD = 1.9)
14MM19 01	267.276	305.559	8.99314	0.874712	0.05354	0.0017	0.16727	0.00537	0.02269	0.00028	352	50	157	5	145	2	0.92053
14MM19 02	287.614	319.186	9.53482	0.901085	0.04824	0.00159	0.15591	0.00529	0.02353	0.00035	111	52	147	5	150	2	0.979798
14MM19 03	370.799	427.711	12.6238	0.866938	0.04964	0.00133	0.15522	0.0037	0.02318	0.00071	178	33	147	3	148	4	0.99322
14MM19 04	132.189	121.343	3.6841	1.08938	0.05291	0.0033	0.16307	0.00971	0.0228	0.00043	325	101	153	8	145	3	0.946309
14MM19 05	436.555	458.484	13.6201	0.952171	0.0471	0.00243	0.14737	0.00738	0.02269	0.00027	54	113	140	7	145	2	0.964912
14MM19 06	638.393	620.58	19.1399	1.0287	0.04901	0.00113	0.15688	0.00355	0.0232	0.00022	148	36	148	3	148	1	1
14MM19 07	347.187	306.163	9.59039	1.13399	0.04652	0.00135	0.1491	0.00442	0.0232	0.00023	25	45	141	4	148	1	0.951557
14MM19 08	203.638	212.576	6.92546	0.957955	0.04847	0.00208	0.17244	0.00797	0.02588	0.00048	122	72	162	7	165	3	0.981651
14MM19 09	1128.6	1052.12	30.734	1.07269	0.05015	0.00116	0.1544	0.00361	0.02233	0.00025	202	34	146	3	142	2	0.972222
14MM19 10	460.088	602.184	16.899	0.764031	0.04979	0.00127	0.15792	0.00352	0.02316	0.00034	185	27	149	3	148	2	0.993266
14MM19 11	152.795	167.125	4.94818	0.914255	0.04696	0.00252	0.14621	0.00749	0.02277	0.0003	47	86	139	7	145	2	0.957746
14MM19 12	341.979	343.331	9.89928	0.996062	0.0492	0.00167	0.15439	0.00536	0.0228	0.00033	157	54	146	5	145	2	0.993127
14MM19 13	465.692	531.77	15.204	0.875739	0.04966	0.00187	0.15322	0.00555	0.0224	0.00021	179	67	145	5	143	1	0.986111
14MM19 14	247.326	316.28	8.95694	0.781984	0.04907	0.00172	0.15594	0.00631	0.02296	0.00038	151	64	147	6	146	2	0.993174
14MM19 15	322.102	304.186	9.19531	1.0589	0.05225	0.00155	0.16352	0.00476	0.02272	0.00022	296	49	154	4	145	1	0.939799
14MM19 16	497.946	440.523	13.5257	1.13035	0.05096	0.00131	0.15931	0.00385	0.02287	0.00041	239	26	150	3	146	3	0.972973
14MM19 17	652.042	631.803	19.2844	1.03203	0.04951	0.00121	0.15653	0.00378	0.02296	0.00028	172	34	148	3	146	2	0.986395
14MM19 18	177.267	196.679	5.73655	0.901302	0.05379	0.0025	0.16611	0.00769	0.02239	0.00028	362	82	156	7	143	2	0.913043
14MM19 19	311.775	329.132	9.75314	0.947263	0.05011	0.00111	0.15581	0.00369	0.02259	0.00025	200	35	147	3	144	2	0.979381
14MM19 20	308.396	524.5	14.1417	0.587982	0.04882	0.00079	0.15123	0.00259	0.02251	0.00021	139	23	143	2	144	1	0.993031
14MM19 21	190.955	169.558	5.31278	1.12619	0.04814	0.00304	0.15072	0.00927	0.02271	0.00032	106	141	143	8	145	2	0.986111
14MM19 22	286.09	301.903	9.24724	0.947622	0.05307	0.0013	0.16972	0.00384	0.02342	0.00027	332	31	159	3	149	2	0.935065
14MM19 23	108.392	100.502	3.13382	1.07851	0.05463	0.00542	0.16926	0.01651	0.02247	0.0004	397	227	159	14	143	3	0.89404
14MM19 24	242.169	249.832	7.41714	0.969329	0.05186	0.00128	0.15928	0.00391	0.0224	0.00026	279	35	150	3	143	2	0.952218
14MM19 25	260.294	289.778	9.57167	0.898253	0.05276	0.00206	0.18709	0.00706	0.02591	0.00038	318	59	174	6	165	2	0.946903
14MM19 26	122.166	108.764	3.38539	1.12322	0.04643	0.00191	0.14665	0.00611	0.0231	0.00032	20	63	139	5	147	2	0.944056
14MM19 27	175.314	156.076	5.18492	1.12326	0.04945	0.00148	0.16924	0.00539	0.02497	0.0003	169	52	159	5	159	2	1
14MM19 28	876.121	481.649	17.3452	1.819	0.05121	0.00101	0.15971	0.00325	0.02263	0.00019	250	31	150	3	144	1	0.959184
14MM19 29	140.783	168.308	5.15451	0.83646	0.04859	0.00359	0.1484	0.01083	0.02215	0.00026	128	166	140	10	141	2	0.992883
14MM19 30	340.279	363.837	11.6206	0.935253	0.05037	0.00102	0.17221	0.00373	0.02484	0.00028	212	30	161	3	158	2	0.981191
14MM19 31	344.055	307.679	9.80168	1.11823	0.05141	0.00113	0.16378	0.00359	0.0232	0.00022	259	33	154	3	148	1	0.960265
14MM19 32	370.981	453.582	13.3632	0.817891	0.04943	0.00103	0.16919	0.00383	0.02499	0.00036	168	28	159	3	159	2	1
14MM19 33	172.122	160.461	4.88763	1.07267	0.05175	0.00154	0.16262	0.00488	0.02299	0.0003	274	45	153	4	146	2	0.953177
14MM19 34	270.215	289.908	8.842	0.932074	0.05023	0.00121	0.15717	0.00372	0.02288	0.0003	206	31	148	3	146	2	0.986395
14MM26, Monzogranite, weighted mean age: 146 ± 1 Ma (24 spots, MSWD = 3.3)
14MM26 01	258.06	257.401	8.27114	1.00256	0.04605	0.00334	0.1451	0.01041	0.02285	0.00024		161	138	9	146	2	0.943662
14MM26 02	580.922	569.121	17.4254	1.02074	0.04863	0.0011	0.15662	0.00374	0.02335	0.00025	130	36	148	3	149	2	0.993266
14MM26 03	234.236	312.66	8.68224	0.74917	0.05128	0.00163	0.16388	0.00521	0.02328	0.00029	253	50	154	5	148	2	0.960265
14MM26 04	352.544	419.991	12.0128	0.839409	0.05044	0.00129	0.16262	0.00463	0.02335	0.00029	215	43	153	4	149	2	0.97351
14MM26 05	744.22	742.595	22.2259	1.00219	0.04869	0.00101	0.15725	0.00385	0.02334	0.00028	133	35	148	3	149	2	0.993266
14MM26 06	386.52	351.839	10.9632	1.09857	0.04605	0.00299	0.14513	0.00931	0.02286	0.00023		143	138	8	146	1	0.943662
14MM26 07	218.044	253.099	7.27246	0.861496	0.04918	0.00279	0.15301	0.00848	0.02257	0.00028	156	130	145	7	144	2	0.99308
14MM26 08	217.389	224.242	6.59834	0.969438	0.05022	0.00166	0.16	0.00505	0.02327	0.00032	205	48	151	4	148	2	0.979933
14MM26 09	226.768	216.126	6.43178	1.04924	0.04889	0.00366	0.14998	0.01106	0.02225	0.00029	143	169	142	10	142	2	1
14MM26 10	174.031	196.432	5.77504	0.885961	0.04652	0.00298	0.14509	0.00912	0.02262	0.00029	25	141	138	8	144	2	0.957447
14MM26 11	88.3937	82.9579	2.57369	1.06552	0.05297	0.00297	0.16474	0.00867	0.02313	0.00043	328	86	155	8	147	3	0.94702
14MM26 12	333.774	318.251	9.64414	1.04878	0.04781	0.00151	0.1519	0.00492	0.02305	0.00026	90	54	144	4	147	2	0.979381
14MM26 13	563.358	551.283	16.5363	1.0219	0.0495	0.00128	0.15521	0.00382	0.02278	0.0002	172	41	147	3	145	1	0.986301
14MM26 14	268.023	256.985	7.56121	1.04295	0.04936	0.00126	0.15274	0.00392	0.02246	0.00024	165	40	144	3	143	2	0.993031
14MM26 15	376.698	331.084	10.0264	1.13777	0.05137	0.00156	0.15713	0.00463	0.02222	0.00019	258	52	148	4	142	1	0.958621
14MM26 16	377.162	314.564	9.76482	1.199	0.05563	0.00202	0.17179	0.00566	0.02251	0.00021	438	56	161	5	143	1	0.881579
14MM26 17	475.555	579.067	17.0398	0.821244	0.04911	0.00116	0.1587	0.00378	0.02341	0.00023	153	37	150	3	149	1	0.993311
14MM26 18	362.726	296.477	9.46325	1.22346	0.04879	0.00368	0.15273	0.01134	0.0227	0.00031	138	170	144	10	145	2	0.99308
14MM26 19	413.873	407.425	12.0016	1.01583	0.04936	0.001	0.15055	0.00303	0.02216	0.00021	165	29	142	3	141	1	0.992933
14MM26 20	508.997	506.836	15.4537	1.00426	0.05022	0.00092	0.16377	0.00316	0.02371	0.00026	205	25	154	3	151	2	0.980328
14MM26 21	1815.78	950.67	35.8681	1.91	0.04931	0.00063	0.1634	0.00237	0.02401	0.00022	163	18	154	2	153	1	0.993485
14MM26 22	444.242	444.782	13.8056	0.998786	0.04827	0.00292	0.14544	0.0086	0.02185	0.00029	113	136	138	8	139	2	0.99278
14MM26 23	864.09	837.914	25.7709	1.03124	0.04909	0.00063	0.15689	0.00238	0.02312	0.00019	152	20	148	2	147	1	0.99322
14MM26 24	426.858	312.259	10.4936	1.367	0.05571	0.00199	0.17931	0.00749	0.02303	0.00028	441	71	167	6	147	2	0.872611
14MM26 25	420.518	477.874	14.2159	0.879978	0.04874	0.00083	0.15551	0.00277	0.02315	0.00019	135	26	147	2	148	1	0.99322
14MM26 26	605.995	520.26	16.6437	1.16479	0.05178	0.00107	0.16421	0.00371	0.02298	0.00026	276	31	154	3	146	2	0.946667
14MM26 27	236.174	256.922	7.7268	0.919241	0.04999	0.00123	0.16092	0.0041	0.02339	0.00025	194	39	152	4	149	2	0.980066
14MM26 28	289.727	219.615	7.1996	1.31925	0.04901	0.00125	0.15795	0.00451	0.02329	0.00026	148	46	149	4	148	2	0.993266
14MM26 29	257.713	254.901	7.78616	1.01103	0.05085	0.00125	0.161	0.00395	0.02306	0.00026	234	36	152	3	147	2	0.966555
14MM26 30	252.095	198.384	6.74793	1.27074	0.04738	0.00361	0.15806	0.01177	0.02419	0.00039	69	170	149	10	154	2	0.966997
14MM27, Monzogranite, weighted mean age: 141 ± 1 Ma (20 spots, MSWD = 1.6)
14MM27 01	484.537	318.737	9.99578	1.52018	0.04792	0.00145	0.14303	0.00429	0.02171	0.00022	95	52	136	4	138	1	0.985401
14MM27 02	172.402	176.609	5.05079	0.976182	0.04951	0.00206	0.14995	0.00563	0.02211	0.00025	172	66	142	5	141	2	0.992933
14MM27 03	213.026	189.365	5.6521	1.12495	0.04696	0.00183	0.14283	0.00551	0.02211	0.00026	47	62	136	5	141	2	0.963899
14MM27 04	296.063	289.443	8.39086	1.02287	0.05787	0.00209	0.17456	0.00594	0.022	0.00025	525	55	163	5	140	2	0.848185
14MM27 05	111.346	104.027	3.34176	1.07036	0.05791	0.00686	0.17702	0.02066	0.02217	0.00045	527	269	165	18	141	3	0.843137
14MM27 06	225.55	170.951	5.3511	1.31939	0.05354	0.00254	0.16239	0.00837	0.02206	0.00029	352	93	153	7	141	2	0.918367
14MM27 07	133.367	123.06	3.68875	1.08376	0.04605	0.00302	0.13627	0.00873	0.02146	0.00031		144	130	8	137	2	0.947566
14MM27 08	399.284	327.616	9.9473	1.21876	0.05105	0.0014	0.15727	0.00442	0.02233	0.00022	243	47	148	4	142	1	0.958621
14MM27 09	246.796	260.423	7.32965	0.947674	0.04884	0.00172	0.14913	0.00489	0.02232	0.00027	140	54	141	4	142	2	0.992933
14MM27 10	138.459	108.962	3.29881	1.27071	0.05043	0.00256	0.15035	0.00766	0.02184	0.00029	215	93	142	7	139	2	0.978648
14MM27 11	278.545	212.294	6.62909	1.31207	0.0508	0.0018	0.15603	0.00547	0.02234	0.00025	232	60	147	5	142	2	0.965398
14MM27 12	114.337	92.0363	2.75858	1.24231	0.0539	0.00257	0.16117	0.00647	0.02223	0.00043	367	56	152	6	142	3	0.931973
14MM27 13	194.345	134.459	3.99983	1.44539	0.05433	0.00291	0.15073	0.00739	0.02035	0.00027	385	86	143	7	130	2	0.904762
14MM27 14	403.436	277.259	8.98743	1.45509	0.054	0.00227	0.17069	0.00785	0.02276	0.00025	371	84	160	7	145	2	0.901639
14MM27 15	524.806	447.198	13.3211	1.17354	0.0518	0.00114	0.15704	0.00349	0.02197	0.00019	277	35	148	3	140	1	0.944444
14MM27 16	477.82	375.679	11.5566	1.27188	0.05193	0.00144	0.16155	0.00482	0.0225	0.00027	282	46	152	4	143	2	0.938983
14MM27 17	445.231	334.724	10.6283	1.33014	0.05275	0.00146	0.16294	0.00437	0.02246	0.00028	318	39	153	4	143	2	0.932432
14MM27 18	297.429	206.989	6.6823	1.43694	0.061	0.00184	0.18554	0.00576	0.02201	0.00025	639	47	173	5	140	2	0.789137
14MM27 19	137.259	143.325	4.47426	0.957673	0.05158	0.00173	0.1755	0.00623	0.0248	0.00036	267	55	164	5	158	2	0.962733
14MM27 20	256.442	199.257	6.59455	1.28699	0.04605	0.00208	0.14135	0.00618	0.02226	0.00024		96	134	5	142	2	0.942029
14MM27 21	92.4176	231.466	6.46458	0.39927	0.04857	0.00231	0.15433	0.00705	0.02305	0.00031	127	108	146	6	147	2	0.993174
14MM27 22	133.263	112.3	3.42333	1.18667	0.05129	0.00199	0.15407	0.00579	0.02207	0.0003	254	62	145	5	141	2	0.972028
14MM27 23	141.155	113.524	3.59704	1.24339	0.05466	0.00175	0.1667	0.00482	0.02247	0.00031	398	40	157	4	143	2	0.906667
14MM27 24	112.936	107.932	3.42669	1.04635	0.04739	0.00186	0.15692	0.00614	0.02424	0.00036	69	61	148	5	154	2	0.960265
14MM27 25	247.097	256.109	8.16495	0.964811	0.05041	0.00123	0.16943	0.00415	0.02446	0.00028	214	35	159	4	156	2	0.980952
14MM27 26	468.851	349.708	11.3488	1.34069	0.04999	0.00274	0.15633	0.0084	0.02268	0.00024	194	127	147	7	145	2	0.986301
14MM27 27	335.981	283.572	8.91365	1.18482	0.05114	0.00117	0.16583	0.00406	0.02356	0.00029	247	34	156	4	150	2	0.960784
14MM27 28	248.591	214.117	7.32708	1.16101	0.05217	0.00147	0.18211	0.005	0.02552	0.00032	293	40	170	4	162	2	0.951807
14MM27 29	97.6762	86.9042	2.66119	1.12395	0.04985	0.00209	0.15715	0.00606	0.02324	0.00035	188	62	148	5	148	2	1
14MM27 30	317.436	434.643	13.9568	0.730336	0.05066	0.00094	0.19341	0.00439	0.02781	0.00045	225	26	180	4	177	3	0.983193
14MM27 31	155.429	124.929	3.94685	1.24414	0.04934	0.00172	0.15733	0.00547	0.02324	0.00033	164	55	148	5	148	2	1
14MM27 32	275.279	178.68	5.807	1.54063	0.05047	0.00158	0.15332	0.00455	0.02237	0.00029	217	45	145	4	143	2	0.986111
14MM27 33	663.523	481.134	17.2266	1.37908	0.05029	0.00088	0.17571	0.00327	0.02535	0.00024	209	26	164	3	161	2	0.981538
14MM27 34	299.908	261.524	8.17302	1.14677	0.0477	0.00119	0.15461	0.00383	0.02355	0.00025	84	39	146	3	150	2	0.972973
14MM27 35	111.881	112.769	3.37778	0.992128	0.04831	0.00186	0.15354	0.00575	0.02338	0.00033	114	61	145	5	149	2	0.972789
14MM27 36	90.2237	75.469	2.43802	1.19551	0.05196	0.00435	0.16175	0.01335	0.02258	0.00032	284	192	152	12	144	2	0.945946
14MM37, Monzogranite, weighted mean age: 144 ± 1 Ma (31 spots, MSWD = 0.84)
14MM37 01	310.23	376.981	11.3167	0.822934	0.04878	0.00321	0.15056	0.00979	0.02238	0.00022	137	149	142	9	143	1	0.992982
14MM37 02	400.219	412.827	12.5498	0.969461	0.05011	0.00152	0.15745	0.00541	0.02264	0.00026	200	58	148	5	144	2	0.972603
14MM37 03	224.425	300.83	8.61938	0.74602	0.05248	0.00151	0.16238	0.00461	0.02248	0.00026	306	44	153	4	143	2	0.932432
14MM37 04	411.705	460.171	13.9372	0.894679	0.04958	0.00126	0.15697	0.00385	0.02297	0.00024	175	38	148	3	146	2	0.986395
14MM37 05	372.612	408.149	11.9829	0.912932	0.0541	0.00172	0.16737	0.00491	0.02255	0.00028	375	43	157	4	144	2	0.913621
14MM37 06	279.713	304.422	9.0844	0.918832	0.04844	0.00153	0.15113	0.00464	0.02271	0.0003	121	48	143	4	145	2	0.986111
14MM37 07	152.155	172.004	6.41062	0.8846	0.0489	0.00643	0.15605	0.02043	0.02314	0.00029	143	268	147	18	147	2	1
14MM37 08	267.042	303.097	8.84254	0.881044	0.04757	0.00151	0.15035	0.00525	0.02287	0.0004	78	49	142	5	146	3	0.972222
14MM37 09	205.675	277.195	7.86588	0.741987	0.05125	0.00158	0.16104	0.00504	0.02283	0.00029	252	48	152	4	146	2	0.959732
14MM37 10	220.915	258.174	7.47038	0.855682	0.04838	0.00167	0.14812	0.00462	0.02239	0.00025	118	53	140	4	143	2	0.978799
14MM37 11	342.652	360.49	10.5229	0.950519	0.04958	0.00133	0.15234	0.00393	0.02239	0.00027	175	38	144	3	143	2	0.993031
14MM37 12	441.002	311.093	10.2459	1.41759	0.04865	0.00144	0.1511	0.00431	0.02264	0.00028	131	44	143	4	144	2	0.993031
14MM37 13	226.165	294.221	8.31573	0.768693	0.05406	0.00179	0.16847	0.00629	0.02249	0.00025	374	64	158	5	143	2	0.900332
14MM37 14	252.847	269.773	8.02171	0.937261	0.04849	0.00173	0.15034	0.00507	0.02267	0.00027	123	57	142	4	145	2	0.979094
14MM37 15	314.101	354.461	10.4025	0.886137	0.0485	0.00143	0.15022	0.00444	0.0225	0.00022	124	51	142	4	143	1	0.992982
14MM37 16	186.293	216.422	6.32624	0.860785	0.05099	0.00142	0.15883	0.00442	0.02268	0.00029	240	41	150	4	145	2	0.966102
14MM37 17	219.114	273.052	10.1218	0.802463	0.05057	0.00979	0.15551	0.03001	0.0223	0.00034	221	361	147	26	142	2	0.965398
14MM37 18	175.763	215.897	6.39414	0.814105	0.05001	0.00297	0.15682	0.00916	0.02274	0.00025	195	136	148	8	145	2	0.979522
14MM37 19	278.231	251.804	8.11044	1.10495	0.05313	0.00137	0.17656	0.00495	0.02406	0.00026	334	44	165	4	153	2	0.924528
14MM37 20	301.12	218.478	7.0402	1.37826	0.04845	0.00132	0.14922	0.00387	0.02254	0.00025	121	40	141	3	144	2	0.978947
14MM37 21	481.524	378.592	12.2812	1.27188	0.04852	0.00252	0.1523	0.00775	0.02276	0.00025	125	118	144	7	145	2	0.99308
14MM37 22	231.157	283.075	8.22472	0.816595	0.0492	0.00112	0.1565	0.00373	0.0231	0.00024	157	36	148	3	147	2	0.99322
14MM37 23	427.161	431.838	13.6796	0.989172	0.04841	0.0009	0.16399	0.00354	0.02455	0.00029	120	29	154	3	156	2	0.987097
14MM37 24	429.758	451.504	13.6288	0.951838	0.04885	0.00108	0.1569	0.00345	0.02334	0.0002	141	35	148	3	149	1	0.993266
14MM37 25	498.594	382.372	11.9744	1.30395	0.04761	0.00091	0.14635	0.00285	0.02236	0.00021	80	28	139	3	143	1	0.971631
14MM37 26	331.868	382.391	11.0134	0.867877	0.05013	0.00103	0.15504	0.00314	0.02254	0.00023	201	28	146	3	144	1	0.986207
14MM37 27	469.703	501.624	22.7838	0.936364	0.04605	0.01007	0.13598	0.02965	0.02142	0.00034		361	129	27	137	2	0.93985
14MM37 28	512.28	539.706	16.1363	0.949182	0.05069	0.00208	0.15602	0.00627	0.02232	0.00018	227	97	147	6	142	1	0.965398
14MM37 29	385.703	443.971	12.8751	0.868759	0.05004	0.00099	0.1563	0.00315	0.02268	0.0002	197	30	147	3	145	1	0.986301
14MM37 30	357.573	431.548	13.3261	0.828583	0.05205	0.00282	0.17485	0.01049	0.02426	0.00024	287	120	164	9	155	1	0.943574
14MM37 31	504.669	516.334	15.6777	0.977409	0.05292	0.00259	0.16267	0.0078	0.0223	0.00022	325	114	153	7	142	1	0.925424
14MM37 32	403.483	402.521	12.316	1.00239	0.04966	0.00117	0.15543	0.00374	0.02276	0.00024	179	36	147	3	145	2	0.986301
14MM37 33	479.881	664.483	19.2506	0.722187	0.05358	0.00101	0.16526	0.00245	0.02254	0.00021	353	18	155	2	144	1	0.926421
14MM37 34	221.119	249.018	7.32022	0.887964	0.05023	0.00157	0.15572	0.00458	0.02257	0.00028	205	46	147	4	144	2	0.979381
14MM37 35	162.86	175.614	5.4658	0.927379	0.05217	0.00478	0.15992	0.01447	0.02223	0.00031	293	209	151	13	142	2	0.938567
14MM37 36	273.345	361.403	10.2763	0.756343	0.05002	0.00099	0.15347	0.00295	0.02228	0.00023	196	26	145	3	142	1	0.979094
14MM18, Monzogranite, weighted mean age: 141 ± 1 Ma (9 spots, MSWD = 0.86)
14MM18 01	1927.7	1404.58	41.6514	1.37244	0.05537	0.00134	0.15962	0.00412	0.02086	0.00018	427	42	150	4	133	1	0.879859
14MM18 02	549.415	559.776	18.1667	0.981491	0.05396	0.00144	0.18244	0.00557	0.02442	0.00032	369	45	170	5	156	2	0.91411
14MM18 03	406.305	436.054	12.5844	0.931775	0.05073	0.00133	0.15492	0.00451	0.02209	0.00029	229	43	146	4	141	2	0.965157
14MM18 04	678.384	1277.24	10.436	0.531133	0.04605	0.00182	0.04372	0.00166	0.00689	7e-05		83	43	2	44.2	0.5	0.972477
14MM18 05	1417.7	1012.71	35.4277	1.39991	0.05111	0.00553	0.15771	0.01691	0.02238	0.00031	246	247	149	15	143	2	0.958904
14MM18 06	382.534	375.065	10.8935	1.01992	0.05314	0.0018	0.15974	0.00523	0.02188	0.00024	335	54	150	5	140	2	0.931034
14MM18 07	2390.21	1636.9	54.0318	1.46021	0.06404	0.00131	0.1972	0.0045	0.02224	0.00018	743	34	183	4	142	1	0.747692
14MM18 08	2221.25	681.871	21.4806	3.25758	0.06777	0.00154	0.19495	0.00428	0.02091	0.00023	862	28	181	4	133	1	0.694268
14MM18 09	1167.77	693.527	22.3675	1.68382	0.08518	0.00348	0.26678	0.01385	0.02215	0.00028	1320	81	240	11	141	2	0.480315
14MM18 10	614.365	609.155	20.6013	1.00855	0.05814	0.0053	0.18316	0.0166	0.02285	0.00021	535	207	171	14	146	1	0.842271
14MM18 11	957.637	743.154	26.9641	1.28861	0.06787	0.00684	0.20608	0.02065	0.02202	0.00024	865	218	190	17	140	2	0.69697
14MM18 12	964.34	769.552	27.1884	1.25312	0.06694	0.00527	0.22659	0.01754	0.02455	0.00035	836	169	207	15	156	2	0.719008
14MM18 13	423.952	293.224	9.41605	1.44583	0.04996	0.00155	0.15127	0.00454	0.02199	0.00018	193	55	143	4	140	1	0.978799
14MM18 14	868.108	755.472	24.1813	1.14909	0.07553	0.00719	0.23115	0.02175	0.0222	0.00031	1083	198	211	18	142	2	0.609065
14MM18 15	1235.79	1036.67	34.9582	1.19208	0.05358	0.00102	0.18072	0.00365	0.02448	0.00031	353	24	169	3	156	2	0.92
14MM18 16	732.545	648.309	20.5252	1.12993	0.05258	0.00306	0.16784	0.00961	0.02315	0.00024	311	136	158	8	148	2	0.934641
14MM18 17	180.325	139.45	4.76002	1.29312	0.05112	0.00521	0.16387	0.01653	0.02325	0.00035	246	233	154	14	148	2	0.960265
14MM18 18	1044.53	760.194	26.5943	1.37403	0.04605	0.00226	0.15235	0.00706	0.024	0.00039		106	144	6	153	2	0.939394
14MM18 19	589.614	560.343	16.5783	1.05224	0.04879	0.00113	0.14853	0.00355	0.0221	0.00019	138	40	141	3	141	1	1
14MM18 20	358.751	359.105	10.5978	0.999015	0.05028	0.00128	0.15331	0.0036	0.02231	0.00021	208	37	145	3	142	1	0.979094
14MM18 21	171.301	166.457	4.88783	1.0291	0.05027	0.00189	0.15126	0.00526	0.02218	0.00029	207	56	143	5	141	2	0.985915
14MM18 22	316.558	374.402	10.7221	0.845504	0.04605	0.00189	0.13557	0.00539	0.02135	0.00023		87	129	5	136	1	0.94717
14MM18 23	212.883	265.621	7.44286	0.801457	0.04976	0.00143	0.15021	0.00409	0.02216	0.00026	184	41	142	4	141	2	0.992933
14MM18 24	717.638	761.695	23.2671	0.942159	0.05579	0.00251	0.1696	0.00742	0.02205	0.00023	444	103	159	6	141	1	0.88
14MM18 25	308.253	412.071	11.6068	0.748057	0.04941	0.00102	0.15441	0.00327	0.02273	0.00025	168	29	146	3	145	2	0.993127
14MM18 26	385.162	388.195	12.1952	0.992187	0.04883	0.00101	0.16026	0.0031	0.02397	0.00022	140	28	151	3	153	1	0.986842
14MM18 27	621.023	442.009	28.1908	1.405	0.12889	0.01536	0.41347	0.04856	0.02327	0.00047	2083	219	351	35	148	3	0.186373
14MM18 28	663.579	608.909	20.4573	1.08978	0.04925	0.00214	0.16631	0.00706	0.02449	0.00023	160	101	156	6	156	1	1
14MM18 29	737.327	654.554	22.4661	1.12646	0.05826	0.0038	0.19091	0.01228	0.02377	0.00027	540	147	177	10	151	2	0.841463
14MM18 30	767.557	671.693	26.0071	1.14272	0.06644	0.00512	0.20698	0.01576	0.02259	0.00027	820	166	191	13	144	2	0.719403

## Sheet: S3 Zircon Lu-Hf isotopes
Table S3. In-situ zircon Hf isotopes analyzed by LA-MC-ICP-MS for intrusive rocks from the Zhegu, Wengmunong, and Dulu plutons in the central Lhasa subterrane.
Spot	Age (Ma)	176Yb/177Hf	176Lu/177Hf	176Hf/177Hf	±2s	(176Hf/177Hf)t	εHf(0)	εHf(t)	±2s	TDM	TDMC	fLu/Hf
14RD01, Granodiorite, 156 ± 1 Ma, εHf(t) = -10.1 ~ -7.9 (16 spots)
14RD01 01	156	0.01818	0.000661	0.282424	1.6e-05	0.282422	-12.7659	-9.37166	0.565997	1159.67	1774.7	-0.980327
14RD01 02	155	0.0187	0.000668	0.282459	1.6e-05	0.282457	-11.5282	-8.13426	0.565997	1111.24	1696.31	-0.980119
14RD01 03	156	0.01815	0.0006476	0.282454	1.6e-05	0.282452	-11.705	-8.30903	0.565997	1117.6	1707.39	-0.980726
14RD01 04	156	0.02347	0.0008597	0.28243	1.7e-05	0.282427	-12.5537	-9.17991	0.601372	1157.37	1762.48	-0.974414
14RD01 06	155	0.01651	0.0005969	0.282419	1.6e-05	0.282417	-12.9427	-9.54192	0.565997	1164.66	1785.51	-0.982235
14RD01 07	156	0.01921	0.0007014	0.282436	1.7e-05	0.282434	-12.3415	-8.95133	0.601372	1144.22	1748.07	-0.979125
14RD01 08	155	0.0175	0.0006433	0.282466	1.5e-05	0.282464	-11.2807	-7.88409	0.530622	1100.8	1680.46	-0.980854
14RD01 09	154	0.019652	0.0007778	0.282437	2.2e-05	0.282435	-12.3062	-8.92384	0.778246	1145.12	1746.29	-0.976851
14RD01 10	157	0.02797	0.000993	0.282442	1.6e-05	0.282439	-12.1294	-8.76917	0.565997	1144.63	1736.41	-0.970446
14RD01 12	156	0.02071	0.000746	0.282441	1.7e-05	0.282439	-12.1647	-8.77906	0.601372	1138.59	1737.14	-0.977798
14RD01 13	157	0.01626	0.0005995	0.282445	1.8e-05	0.282443	-12.0233	-8.62244	0.636747	1128.68	1727.27	-0.982158
14RD01 15	156	0.01991	0.0007317	0.282449	1.7e-05	0.282447	-11.8818	-8.49459	0.601372	1127.03	1719.12	-0.978223
14RD01 16	150	0.02148	0.000788	0.282438	1.9e-05	0.282436	-12.2708	-8.88952	0.672121	1144.03	1744.12	-0.976548
14RD01 17	156	0.02386	0.0009	0.282454	1.8e-05	0.282451	-11.705	-8.33508	0.636747	1125.04	1708.95	-0.973214
14RD01 18	157	0.02482	0.000934	0.282433	1.8e-05	0.28243	-12.4476	-9.08146	0.636747	1155.44	1756.22	-0.972202
14RD04, Dioritic enclave, 153 ± 2 Ma, εHf(t) = -8.1 ~ -3.9 (16 spots)
14RD04 01	158	0.04047	0.001451	0.282554	2.3e-05	0.28255	-8.16875	-4.9183	0.813615	999.548	1489.71	-0.956815
14RD04 02	157	0.0374	0.00134	0.282532	2.4e-05	0.282528	-8.94673	-5.6853	0.84899	1027.78	1538.45	-0.960119
14RD04 03	150	0.0711	0.002379	0.282579	3e-05	0.282572	-7.28469	-4.12784	1.06124	988.572	1439.25	-0.929196
14RD04 04	154	0.04264	0.00142	0.282511	2e-05	0.282507	-9.68934	-6.43627	0.707492	1059.81	1586.08	-0.957738
14RD04 05	156	0.1184	0.003877	0.282503	2.5e-05	0.282492	-9.97224	-6.96789	0.884364	1146.6	1618.9	-0.884613
14RD04 06	153	0.1109	0.003709	0.28256	2.5e-05	0.282549	-7.95657	-4.93454	0.884364	1054.88	1490.06	-0.889613
14RD04 07	154	0.0444	0.001547	0.282583	2.3e-05	0.282579	-7.14324	-3.90215	0.813615	960.744	1425.13	-0.953958
14RD04 08	155	0.04978	0.001892	0.282525	2.5e-05	0.28252	-9.19426	-5.98878	0.884364	1053.24	1557.53	-0.94369
14RD04 09	153	0.05977	0.002014	0.282531	2.2e-05	0.282525	-8.98209	-5.78888	0.778241	1048.08	1544.81	-0.94006
14RD04 10	155	0.0274	0.001048	0.282521	1.8e-05	0.282518	-9.33571	-6.04488	0.636742	1035.3	1561.36	-0.96881
14RD04 11	149	0.0442	0.001576	0.282557	2.1e-05	0.282552	-8.06266	-4.82482	0.742866	998.627	1483.74	-0.953095
14RD04 12	152	0.0657	0.002147	0.28255	2.5e-05	0.282544	-8.3102	-5.13022	0.884364	1024.35	1502.97	-0.936101
14RD04 13	151	0.0775	0.002596	0.282497	2.3e-05	0.28249	-10.1844	-7.05051	0.813615	1114.79	1624.62	-0.922738
14RD04 14	154	0.0678	0.002623	0.282561	3.4e-05	0.282553	-7.92121	-4.78927	1.20274	1021.7	1481.18	-0.921935
14RD04 15	151	0.0688	0.002372	0.282468	3.6e-05	0.282461	-11.2099	-8.05371	1.27348	1150.14	1688.26	-0.929405
14RD04 16	190	0.05432	0.001785	0.282475	3.1e-05	0.28247	-10.9624	-7.74669	1.09661	1121.87	1669.03	-0.946875
14MM34, Granodiorite, 145 ± 1 Ma, εHf(t) = -13.9 ~ -7.9 (18 spots)
14MM34 01	152	0.0276	0.0010624	0.282406	1.7e-05	0.282403	-13.4024	-10.2866	0.601357	1197.26	1824.01	-0.968381
14MM34 02	147	0.02482	0.00104	0.282369	2e-05	0.282366	-14.7108	-11.5933	0.707479	1248.4	1906.67	-0.969048
14MM34 03	146	0.03	0.001273	0.282359	1.8e-05	0.282356	-15.0644	-11.9694	0.636731	1270.23	1930.32	-0.962113
14MM34 04	144	0.02969	0.001257	0.282366	1.8e-05	0.282363	-14.8169	-11.7202	0.636731	1259.83	1914.58	-0.962589
14MM34 05	147	0.03931	0.0014778	0.282451	1.7e-05	0.282447	-11.8111	-8.73463	0.601357	1146.72	1725.59	-0.956018
14MM34 06	141	0.03802	0.001467	0.282466	1.8e-05	0.282462	-11.2807	-8.20298	0.636731	1125.09	1691.91	-0.956339
14MM34 07	144	0.01414	0.000588	0.282367	1.7e-05	0.282365	-14.7815	-11.6207	0.601357	1236.42	1908.62	-0.9825
14MM34 08	145	0.03185	0.0012204	0.28246	1.8e-05	0.282457	-11.4928	-8.39158	0.636731	1126.17	1703.96	-0.963679
14MM34 09	145	0.02593	0.0009634	0.282411	1.6e-05	0.282408	-13.2256	-10.1003	0.565983	1187.13	1812.26	-0.971327
14MM34 10	145	0.02866	0.0011052	0.282433	1.7e-05	0.28243	-12.4476	-9.33563	0.601357	1160.69	1763.8	-0.967107
14MM34 11	140	0.03146	0.001212	0.282445	1.8e-05	0.282442	-12.0233	-8.92138	0.636731	1147.07	1737.52	-0.963929
14MM34 12	143	0.02568	0.001035	0.282304	1.7e-05	0.282301	-17.0094	-13.8921	0.601357	1339.19	2051.87	-0.969196
14MM34 13	147	0.03301	0.0012521	0.282425	1.5e-05	0.282422	-12.7305	-9.63271	0.530609	1176.51	1782.55	-0.962735
14MM34 14	146	0.03252	0.001235	0.282423	1.6e-05	0.28242	-12.8012	-9.70181	0.565983	1178.8	1786.93	-0.963244
14MM34 15	141	0.029267	0.0011057	0.282452	1.7e-05	0.282449	-11.7757	-8.66357	0.601357	1133.99	1721.23	-0.967092
14MM34 16	147	0.0656	0.002383	0.282478	1.8e-05	0.282472	-10.8563	-7.86633	0.636731	1135.93	1670.23	-0.929077
14MM34 17	143	0.02414	0.0009129	0.282411	1.6e-05	0.282409	-13.2256	-10.0954	0.565983	1185.55	1811.98	-0.97283
14MM34 18	144	0.02354	0.0009498	0.282363	1.6e-05	0.28236	-14.923	-11.7969	0.565983	1253.81	1919.58	-0.971732
14MM19, Monzogranite, 146 ± 1 Ma, εHf(t) = -7.7 ~ -6.1 (19 spots)
14MM19 03	148	0.0369	0.001456	0.282511	1.7e-05	0.282507	-9.68934	-6.58883	0.601358	1060.84	1590.35	-0.956667
14MM19 04	145	0.04198	0.0014922	0.28251	2e-05	0.282506	-9.7247	-6.6277	0.707481	1063.29	1592.8	-0.955589
14MM19 06	148	0.0363	0.001446	0.28248	1.4e-05	0.282476	-10.7856	-7.68446	0.495236	1104.58	1659.83	-0.956964
14MM19 07	148	0.05557	0.00197	0.282505	1.8e-05	0.2825	-9.90152	-6.8507	0.636732	1084.3	1606.78	-0.941369
14MM19 11	145	0.03471	0.0013468	0.282481	1.6e-05	0.282477	-10.7502	-7.6395	0.565984	1100.24	1657.01	-0.959917
14MM19 13	143	0.031314	0.0013064	0.2825	1.5e-05	0.282496	-10.0783	-6.9635	0.53061	1072.17	1614.16	-0.961119
14MM19 16	146	0.0484	0.001772	0.282506	1.6e-05	0.282501	-9.86615	-6.79621	0.565984	1077.06	1603.39	-0.947262
14MM19 17	146	0.05269	0.002216	0.282525	1.8e-05	0.282519	-9.19426	-6.16697	0.636732	1062.58	1563.33	-0.934048
14MM19 19	144	0.03665	0.0014338	0.282482	1.8e-05	0.282478	-10.7149	-7.61253	0.636732	1101.39	1655.27	-0.957327
14MM19 20	144	0.031886	0.0013178	0.282502	1.6e-05	0.282498	-10.0076	-6.89385	0.565984	1069.67	1609.74	-0.96078
14MM19 22	149	0.03236	0.0013112	0.282497	1.6e-05	0.282493	-10.1844	-7.07008	0.565984	1076.55	1620.92	-0.960976
14MM19 24	143	0.04425	0.001644	0.282517	1.7e-05	0.282513	-9.47716	-6.39474	0.601358	1057.64	1577.97	-0.951071
14MM19 26	147	0.03374	0.001215	0.282511	1.8e-05	0.282508	-9.68934	-6.56556	0.636732	1054.03	1588.95	-0.963839
14MM19 28	144	0.02005	0.000782	0.282498	1.5e-05	0.282496	-10.1491	-6.98361	0.53061	1060.16	1615.61	-0.976726
14MM19 29	141	0.02972	0.001391	0.282525	2.6e-05	0.282521	-9.19426	-6.08731	0.919725	1039.12	1558.55	-0.958601
14MM19 31	148	0.03408	0.001337	0.282521	1.7e-05	0.282517	-9.33571	-6.2236	0.601358	1043.29	1567.21	-0.960208
14MM19 32	159	0.05783	0.002164	0.282504	1.7e-05	0.282498	-9.93688	-6.90481	0.601358	1091.49	1610.14	-0.935595
14MM19 33	146	0.04202	0.001584	0.282501	1.9e-05	0.282497	-10.043	-6.95493	0.672107	1078.75	1613.52	-0.952857
14MM19 34	146	0.03333	0.0013185	0.282504	1.8e-05	0.2825	-9.93688	-6.82317	0.636732	1066.85	1605.26	-0.960759
14MM26, Monzogranite, 146 ± 1 Ma, εHf(t) = -8.8 ~ - 6.8 (14 spots)
14MM26 02	149	0.04936	0.00188	0.28246	1.7e-05	0.282455	-11.4928	-8.43384	0.601358	1146.3	1707.14	-0.944048
14MM26 03	148	0.0486	0.001807	0.282478	2e-05	0.282473	-10.8563	-7.79006	0.707481	1118.24	1666.39	-0.94622
14MM26 04	149	0.05959	0.002277	0.282502	1.7e-05	0.282496	-10.0076	-6.98646	0.601358	1097.78	1615.28	-0.932232
14MM26 05	149	0.06077	0.002157	0.282508	1.6e-05	0.282502	-9.79543	-6.76263	0.565984	1085.49	1601.13	-0.935804
14MM26 06	146	0.05797	0.002194	0.282475	1.9e-05	0.282469	-10.9624	-7.93355	0.672107	1134.41	1675.33	-0.934702
14MM26 07	144	0.0327	0.0012657	0.282474	1.6e-05	0.282471	-10.9978	-7.87929	0.565984	1107.75	1672.24	-0.96233
14MM26 08	148	0.04744	0.0018023	0.282474	2e-05	0.282469	-10.9978	-7.9311	0.707481	1123.83	1675.33	-0.94636
14MM26 10	144	0.0281	0.001076	0.282493	1.8e-05	0.28249	-10.3259	-7.18887	0.636732	1075.46	1628.54	-0.967976
14MM26 11	147	0.0422	0.001445	0.28247	2e-05	0.282466	-11.1392	-8.0381	0.707481	1118.75	1682.24	-0.956994
14MM26 12	147	0.04217	0.0016376	0.282448	1.7e-05	0.282444	-11.9172	-8.83493	0.601358	1155.93	1732.64	-0.951262
14MM26 13	145	0.0437	0.001615	0.28247	1.7e-05	0.282466	-11.1392	-8.05451	0.601358	1123.87	1683.22	-0.951935
14MM26 14	143	0.04008	0.001509	0.28248	1.7e-05	0.282476	-10.7856	-7.69054	0.601358	1106.45	1660.19	-0.955089
14MM26 17	149	0.05622	0.002066	0.282462	1.4e-05	0.282456	-11.4221	-8.38105	0.495236	1149.21	1703.73	-0.938512
14MM26 18	145	0.03213	0.0012446	0.282476	1.5e-05	0.282473	-10.927	-7.80651	0.53061	1104.31	1667.64	-0.962958
14MM27, Monzogranite, 141 ± 1 Ma, εHf(t) = -8.2 ~ -5.9 (14 spots)
14MM27 01	138	0.0486	0.0018069	0.282516	1.8e-05	0.282511	-9.51253	-6.55103	0.636725	1063.73	1583.98	-0.946223
14MM27 02	141	0.03235	0.0012765	0.282469	2e-05	0.282466	-11.1746	-8.16414	0.707473	1115.14	1686.45	-0.962009
14MM27 03	141	0.0448	0.00164	0.282506	1.9e-05	0.282502	-9.86615	-6.88921	0.672099	1073.23	1605.49	-0.95119
14MM27 04	140	0.04242	0.0016203	0.282488	1.6e-05	0.282484	-10.5027	-7.5241	0.565978	1098.35	1645.75	-0.951777
14MM27 06	141	0.04019	0.001489	0.282525	1.7e-05	0.282521	-9.19426	-6.20303	0.601352	1041.85	1562	-0.955685
14MM27 07	137	0.026036	0.0010051	0.282519	1.8e-05	0.282516	-9.40644	-6.37015	0.636725	1036.93	1572.76	-0.970086
14MM27 08	142	0.02885	0.001097	0.2825	1.8e-05	0.282497	-10.0783	-7.05082	0.636725	1066.21	1615.92	-0.967351
14MM27 09	142	0.02787	0.0011109	0.282479	1.7e-05	0.282476	-10.8209	-7.79496	0.601352	1096.17	1663.11	-0.966938
14MM27 10	139	0.03872	0.001379	0.28252	1.6e-05	0.282516	-9.37108	-6.36964	0.565978	1045.88	1572.61	-0.958958
14MM27 11	142	0.0375	0.001328	0.282531	1.9e-05	0.282527	-8.98209	-5.97577	0.672099	1028.87	1547.63	-0.960476
14MM27 12	142	0.0463	0.001634	0.282498	2.1e-05	0.282494	-10.1491	-7.17164	0.742846	1084.48	1623.4	-0.951369
14MM27 15	140	0.04574	0.001834	0.282507	1.6e-05	0.282502	-9.83079	-6.87192	0.565978	1077.44	1604.32	-0.945417
14MM27 16	143	0.0676	0.002547	0.282536	1.9e-05	0.282529	-8.80528	-5.91257	0.672099	1056.18	1543.23	-0.924196
14MM27 17	143	0.04907	0.001749	0.282521	1.5e-05	0.282516	-9.33571	-6.36877	0.530605	1054.91	1572.43	-0.947946
14MM37, Monzogranite, 144 ± 1 Ma, εHf(t) = -10.4 ~ -4.8 (15 spots)
14MM37 01	143	0.02589	0.0010335	0.282506	1.6e-05	0.282503	-9.86615	-6.76801	0.565982	1055.99	1600.31	-0.969241
14MM37 02	144	0.03534	0.001369	0.282434	1.7e-05	0.28243	-12.4123	-9.34687	0.601356	1167.45	1763.63	-0.959256
14MM37 03	143	0.03952	0.001601	0.282491	1.6e-05	0.282487	-10.3966	-7.35266	0.565982	1093.5	1637.2	-0.952351
14MM37 04	146	0.04767	0.001763	0.282546	1.7e-05	0.282541	-8.45165	-5.42252	0.601356	1019.46	1514.69	-0.94753
14MM37 05	144	0.047	0.00173	0.282431	1.8e-05	0.282426	-12.5183	-9.48737	0.63673	1183.11	1772.38	-0.948512
14MM37 06	145	0.03266	0.0012341	0.282478	1.7e-05	0.282475	-10.8563	-7.77758	0.601356	1101.18	1664.27	-0.963271
14MM37 08	146	0.02131	0.000851	0.282512	1.8e-05	0.28251	-9.65398	-6.53838	0.63673	1042.51	1585.8	-0.974673
14MM37 09	146	0.03847	0.0014827	0.282465	1.8e-05	0.282461	-11.316	-8.26111	0.63673	1126.99	1694.82	-0.955872
14MM37 10	143	0.03302	0.001322	0.28253	1.8e-05	0.282526	-9.01745	-5.94651	0.63673	1030.12	1548.09	-0.960655
14MM37 11	143	0.03682	0.0014787	0.282494	1.7e-05	0.28249	-10.2905	-7.23489	0.601356	1085.65	1629.77	-0.955991
14MM37 12	144	0.04786	0.001894	0.28251	1.8e-05	0.282505	-9.7247	-6.70846	0.63673	1074.88	1596.25	-0.943631
14MM37 13	143	0.03339	0.0012505	0.282405	1.7e-05	0.282402	-13.4378	-10.3614	0.601356	1204.67	1827.9	-0.962783
14MM37 14	145	0.0603	0.00231	0.282566	1.8e-05	0.28256	-7.7444	-4.76713	0.63673	1005.64	1472.91	-0.93125
14MM37 15	143	0.034182	0.0013317	0.282434	1.8e-05	0.28243	-12.4123	-9.34332	0.63673	1166.29	1763.42	-0.960366
14MM37 16	145	0.042	0.001707	0.282494	2e-05	0.282489	-10.2905	-7.25663	0.707477	1092.34	1631.07	-0.949196
14MM26, Monzogranite, 141 ± 1 Ma, εHf(t) = -7.7 ~ - 6.1 (11 spots)
14MM18 03	141	0.0748	0.001854	0.28253	1.4e-05	0.282525	-9.01745	-6.06019	0.495231	1044.97	1552.82	-0.944821
14MM18 06	140	0.07266	0.001886	0.282527	1.3e-05	0.282522	-9.12354	-6.1693	0.459857	1050.2	1559.73	-0.943869
14MM18 13	140	0.07732	0.002001	0.282527	1.5e-05	0.282522	-9.12354	-6.18002	0.530605	1053.48	1560.38	-0.940446
14MM18 15	156	0.10094	0.003281	0.282504	2.1e-05	0.282495	-9.93688	-7.11297	0.742846	1125.85	1619.07	-0.902351
14MM18 19	141	0.06605	0.001929	0.282516	1.4e-05	0.282511	-9.51253	-6.56242	0.495231	1067.26	1584.66	-0.942589
14MM18 20	142	0.07369	0.001922	0.282495	1.4e-05	0.28249	-10.2551	-7.30461	0.495231	1097.28	1631.73	-0.942798
14MM18 21	141	0.07051	0.001787	0.28249	1.8e-05	0.282485	-10.432	-7.46889	0.636725	1100.44	1642.19	-0.946815
14MM18 23a	141	0.0795	0.002148	0.28253	1.7e-05	0.282524	-9.01745	-6.08761	0.601352	1053.36	1554.46	-0.936071
14MM18 23b	141	0.06048	0.0017157	0.282491	1.2e-05	0.282486	-10.3966	-7.42687	0.424484	1096.89	1639.55	-0.948937
14MM18 25	145	0.09	0.00261	0.282496	1.7e-05	0.282489	-10.2198	-7.33339	0.601352	1116.68	1633.3	-0.922321
14MM18 26	153	0.07042	0.001918	0.282484	1.5e-05	0.282479	-10.6441	-7.69335	0.530605	1112.98	1656.37	-0.942917
eHf(t) = 10000 ´ {[(176Hf/177Hf)S – (176Lu/177Hf)S ´ (elt – 1)]/[(176Hf/177Hf)CHUR,0 – (176Lu/177Hf)CHUR ´ (elt – 1)] – 1}
TDM = 1/l ´ ln{1 + [(176Hf/177Hf)S – (176Hf/177Hf)DM]/[(176Lu/177Hf)S – (176Lu/177Hf)DM]}
TDMC= TDM – (TDM – t) ´ [(fcc – fs)/(fcc – fDM)]
fLu/Hf = (176Lu/177Hf)S/(176Lu/177Hf)CHUR – 1
l = 1.867 ´ 10-11 year-1 (Soderlund et al., 2004); (176Lu/177Hf)S and (176Hf/177Hf)S are the measured values of the samples;
(176Lu/177Hf)CHUR = 0.0336 and (176Hf/177Hf)CHUR,0 = 0.282785 (Bouvier et al., 2008);
(176Lu/177Hf)DM = 0.0384 and (176Hf/177Hf)DM = 0.28325 (Griffin et al., 2000); (176Lu/177Hf)mean crust = 0.015 (Griffin et al., 2002); fcc = [(176Lu/177Hf)mean crust/(176Lu/177Hf)CHUR] – 1;
fs = fLu/Hf; fDM = [(176Lu/177Hf)DM/(176Lu/177Hf)CHUR] – 1; t = crystallization time of zircon.
Reference
Bouvier, A., Vervoort, J.D., and Patchett, P.J., 2008, The Lu-Hf and Sm-Nd isotopic composition of CHUR: Constraints from unequilibrated chondrites and implications for the bulk composition of terrestrial planets: Earth and Planetary Science Letters, v. 273, p. 48–57, https://doi.org/10.1016/j.epsl.2008.06.010.
Griffin, W. L., Pearson, N. J., Belousova, E., Jackson, S. E., van Achterbergh, E., O'Reilly, S. Y., and Shee, S. R., 2000, The Hf isotope composition of cratonic mantle: LAM-MC-ICPMS analysis of zircon megacrysts in kimberlites: Geochimica et Cosmochimica Acta, v. 64, p. 133–147, https://doi.org/10.1016/s0016-7037(99)00343-9.
Griffin, W.L., Wang, X., Jackson, S.E., Pearson, N.J., O’Reilly, S.Y., Xu, X., and Zhou, X., 2002, Zircon chemistry and magma mixing, SE China: Insitu analysis of Hf isotopes, Tonglu and Pingtan igneous complexes: Lithos, v. 61, p. 237–269, https://doi.org/10.1016/S0024-4937(02)00082-8.
Söderlund, U., Patchett, P.J., Vervoort, J.D., and Isachsen, C.E., 2004, The 176Lu decay constant determined by Lu–Hf and U–Pb isotope systematics of Precambrian mafic intrusions: Earth and Planetary Science Letters, v. 219, p. 311–324, https://doi.org/10.1016/s0012-821x(04)00012-3.

## Sheet: S4 Whole-rock data
Table S4. Whole-rock major and trace element concentrations for intrusive rocks from the Zhegu, Wengmunong, and Dulu plutons in the central Lhasa subterrane, and for duplicate samples and measured USGS standards.
Sample	14RD01	14RD02	14RD03	14RD04	14MM21	14MM22	14MM25	14MM34	14MM35	14MM17	14MM19	14MM20	14MM26	14MM27	14MM28	14MM29	14MM30	14MM31	14MM32	14MM33	14MM36	14MM37	14MM38	14MM18	14MM23		14MM25	14MM34	14MM20	14MM27	14MM37	AGV-2 (n = 3)	BHVO-2 (n = 3)	BCR-2 (n = 3)	RGM-2 (n = 3)	AGV-2	BHVO-2	BCR-2	RGM-2
Pluton	Zhegu pluton				Wenmunong pluton																	Dulu pluton		Wenmunong pluton			Replicate analyses					Measured data of standards				Recommended data
Lithology	Granodiorite			Dioritic enclave	Tonalitic enclave	Granodiorite				Monzogranite														Syenogranite
XRF—major element (wt.%)
SiO2	69.35	66.01	65.61	55.2	62.98	68.02	65.77	66.22	66.75	75.78	73.87	75.02	75.04	74.09	74.08	75.23	76.5	74.8	74.44	73.24	75.26	70.58	71.65	78.06	76.66		66.64	66.31
TiO2	0.3804	0.4874	0.5431	0.724	0.7568	0.5262	0.6452	0.5625	0.4867	0.2346	0.2907	0.2527	0.2855	0.2819	0.2716	0.2153	0.1841	0.2369	0.3409	0.2951	0.2213	0.4111	0.323	0.1089	0.0825		0.6534	0.5575
Al2O3	13.89	14.26	14.07	16.43	16.94	15.39	14.71	14.3	14.3	12.57	13.38	12.96	13.04	13.33	13.01	12.89	12.47	12.96	12.62	13.53	12.67	14.25	13.81	12.04	12.46		14.81	14.26
TFe2O3	2.86	4.25	4.67	7.2	5.14	4.01	4.87	4.86	4.53	1.58	2.07	1.68	1.8	1.9	1.81	1.43	1.16	1.6	2.28	2.08	1.53	2.92	2.45	0.72	0.65		4.92	4.88
MnO	0.0475	0.0759	0.082	0.1639	0.2499	0.1373	0.1386	0.1149	0.0868	0.0607	0.0838	0.0705	0.0845	0.0653	0.0661	0.0619	0.0529	0.0576	0.0799	0.0647	0.0538	0.0798	0.0464	0.0542	0.023		0.1388	0.1149
MgO	1.47	2.5	2.84	4.72	1.85	1.25	1.7	2.2	1.77	0.45	0.72	0.48	0.47	0.55	0.48	0.37	0.27	0.42	0.65	0.65	0.38	1.06	0.77	0.15	0.13		1.75	2.21
CaO	2.56	4.14	4.26	7.56	3.83	2.24	2.82	4.14	3.56	1.23	1.37	1.58	1.07	1.91	1.7	1.35	1.09	1.62	1.95	1.91	1.45	1.64	1.87	0.35	0.55		2.86	4.13
Na2O	2.62	2.57	2.49	3.86	6	4.86	3.31	2.71	2.74	3.32	3.27	3.2	3.25	3.45	3.23	3.2	3.06	3.16	3.12	3.4	3.21	3.21	3.18	3.08	2.99		3.32	2.71
K2O	4.89	3.82	3.96	2.06	0.96	2.41	3.53	3.39	3.49	4.4	4.27	4.34	3.74	3.69	4.07	4.52	4.7	4.46	3.77	3.93	4.44	3.68	3.99	5.16	5.35		3.55	3.39
P2O5	0.071	0.1027	0.1065	0.1562	0.281	0.1914	0.1407	0.1074	0.0956	0.0424	0.0591	0.0516	0.0443	0.0563	0.0518	0.0422	0.0327	0.0518	0.0687	0.0644	0.0453	0.0968	0.0718	0.009	0.0131		0.1396	0.1061
LOI	1.19928	1.11933	1	1.43914	1.77858	1.25975	1.51909	1.1191	1.26	0.799361	0.979412	0.52	1.33866	0.579421	0.4998	0.4997	0.479904	0.579884	0.79968	0.739556	0.559664	1.29948	0.98	0.379696	0.46		1.53815	1.09912
TOTAL	99.3382	99.3353	99.6316	99.5132	100.766	100.295	99.1536	99.7239	99.0691	100.467	100.363	100.155	100.163	99.9029	99.2693	99.8091	99.9996	99.9462	100.119	99.9038	99.8201	99.2272	99.14	100.112	99.3686		100.32	99.7676
ICP-MS—trace element (ppm)
Li	19.8401	24.1378	36.6545	34.2021	58.778	29.5285	33.8049	18.4011	24.314	9.43272	16.417	27.0686	11.3089	25.7639	23.1205	27.2591	16.2209	23.0195	22.4572	23.8093	20.3034	14.3747	12.9877	12.6317	9.69883				26.8675	24.4561	14.1909	9.9855	4.34097	8.87831	58.8163	11	4.8	9	57
Be	1.4559	1.62345	1.54102	2.68175	2.82887	3.74229	1.71524	1.66754	1.74919	2.23769	2.00921	2.36673	1.64934	2.42784	2.16876	2.15855	2.04202	1.75984	1.86094	2.19996	2.04144	2.17322	1.90761	2.37191	1.72658				2.05305	2.55502	2.2723	2.15559	1.11722	2.01622	2.43736	2.3	1		2.37
Sc	7.26464	11.6969	13.1936	23.3585	21.1673	9.4658	12.1813	14.6035	11.5813	4.72246	5.80332	5.18694	4.33371	7.14772	6.01208	4.33691	3.33083	4.31645	7.11807	6.72388	4.47914	7.66	6.45273	3.47493	2.89324				5.287	7.25318	7.45313	12.3684	31.769	33.5038	4.81264	13	32	33	4.4
V	62.0727	93.0868	106.374	176.815	74.9263	45.4221	84.8992	104.706	86.8542	19.0707	27.7163	21.0749	16.7546	22.9604	23.3495	16.5204	12.9164	20.0323	31.4088	28.5541	18.2666	44.075	40.8389	5.14541	5.13369				21.8183	23.1447	45.0203	117.066	316.851	419.522	12.7176	120	317	416	13
Cr	27.2053	42.0401	49.0512	43.6073	3.18122	1.25659	5.6946	10.4671	8.69219	1.17239	1.28956	1.3941	1.8398	1.66364	0.97617	1.1185	0.95319	1.34507	1.22526	1.28252	1.28027	3.29987	3.42522	0.994292	0.60135				1.48218	0.948844	2.98319	14.9466	287.77	14.7859	3.65736	16	280	16.5	5.9
Co	7.54474	12.5094	16.8893	23.7802	8.90497	5.16351	8.10915	10.7212	6.5754	1.82881	2.89411	2.06251	2.38385	2.21399	2.19089	1.63684	1.28349	2.0439	3.28434	2.83131	3.49005	3.4724	2.9155	0.393658	0.522942				2.01594	2.22523	3.39895	15.0606	45.1577	37.9158	1.95583	16	45	37	2
Ni	16.5955	25.1399	29.6867	36.2402	2.66043	1.68021	3.55086	5.92527	5.1187	0.926202	1.56491	0.994499	1.55384	1.16415	1.19568	1.26645	0.995873	1.19091	1.39057	1.46316	0.855943	2.19264	1.90176	0.611564	0.622406				1.17983	1.05145	2.53371	19.0048	124.412	13.1896	2.95665	20	119	13	5.2
Cu	7.79902	17.0743	31.3773	115.477	2.34111	1.646	5.10434	1.8667	1.31123	0.870726	2.17702	1.00779	4.17603	1.07913	1.0697	0.945931	0.972006	0.948496	1.46318	1.36214	1.06447	9.08504	2.36748	1.52849	0.504906				0.987809	1.09347	8.76707	49.3773	129.495	20.2184	9.4201	53	127	18.4	9.6
Zn	28.1069	38.5683	42.0004	70.2397	139.523	51.3271	118.409	49.875	50.1125	16.9997	20.6188	21.1372	53.6634	20.1924	24.5848	20.2942	17.6815	19.7423	29.6215	25.4598	20.3636	131.126	109.345	29.9057	8.16164				21.6121	20.8266	128.094	84.9431	105.513	132.668	30.9984	86	103	133	32
Ga	13.4322	15.1817	15.1555	17.5625	22.1295	18.1474	16.5639	15.1768	15.8637	12.9373	14.2047	14.1382	13.6851	14.9309	14.4176	13.2824	13.0427	13.2982	13.9681	14.5222	13.5849	15.8062	14.8561	13.0653	12.1024				14.3317	15.116	15.7923	20.8528	21.5342	22.7232	16.1901	20	21.7	23	16.5482
Rb	226.04	190.399	194.755	110.344	75.2192	150.241	151.256	152.794	159.178	207.587	186.231	200.246	146.048	172.831	188.633	198.806	225.627	202.957	164.583	171.749	204.325	168.509	189.243	277.634	237.233				202.34	176.353	168.487	67.0082	9.1524	47.9271	148.277	66.3	9.11	46.9	150
Sr	179.791	201.163	202.06	182.798	189.166	144.857	167.453	186.288	187.571	112.049	166.323	109.391	143.002	129.979	123.36	89.6535	85.5792	121.109	131.187	143.359	99.462	140.954	181.294	26.2664	41.803				110.457	131.395	139.162	655.668	397.011	343.735	108.219	661	396	340	107.5
Y	23.1699	25.0528	27.5694	34.214	48.1848	25.0358	32.439	29.7537	27.5682	25.348	28.8955	28.6284	28.6088	34.2715	34.4852	22.5068	20.7326	24.7601	36.1899	31.3124	25.8478	28.4888	31.0112	17.3672	8.47337				29.5789	34.4738	28.7583	19.7639	26.6245	36.5354	23.2598	20	26	37	23.1554
Zr	126.701	177.809	189.259	135.558	417.498	227.183	165.291	172.118	136.077	114.94	148.162	118.412	145.6	147.716	135.688	110.654	106.54	134.161	153.264	153.492	124.074	158.762	153.405	64.4693	54.9794				128.446	147.029	171.74	228.081	167.807	185.146	225.25	230	172	184	220
Nb	9.76078	10.385	11.3923	12.6218	23.4522	13.0238	10.5807	10.4412	10.809	12.5621	11.3954	12.7068	9.96803	13.7644	13.9256	10.8095	10.9817	9.98848	12.8575	12.0815	11.8246	11.362	10.7702	14.5202	8.43914				12.9355	14.0937	11.399	13.952	18.8845	12.6014	9.11863	14.5	18.1	12.6	9.29555
Cs	6.12246	7.11383	6.97981	7.73827	2.38569	3.56875	4.35695	4.79223	4.20494	3.7116	3.53611	3.22051	2.87794	2.93635	4.17983	3.14669	3.10814	2.6615	3.12535	3.21031	3.1573	3.0577	5.11401	3.02129	2.72372				3.29643	2.99963	3.03776	1.13599	0.111514	1.10072	9.61371	1.16	0.1	1.1	9.6
Ba	444.068	355.359	376.478	204.73	111.479	226.094	492.14	401.027	461.417	461.185	497.686	440.129	1371.66	438.705	413.593	384.145	401.105	487.92	491.577	444.838	421.497	720.702	683.028	81.61	96.8534				440.455	443.709	715.516	1114.08	130.106	677.573	826.88	1130	131	677	810
La	24.9064	46.2714	37.3094	30.0044	38.8783	39.4921	37.0824	30.8815	31.0203	36.8486	42.3575	45.0114	68.9299	50.2156	40.3398	35.7729	40.1517	38.1072	41.2242	39.3112	42.7038	35.633	40.1398	25.7501	28.2532				44.4435	49.7869	34.312	37.9281	15.5736	25.3536	23.1937	37.9	15.2	24.9	24
Ce	55.1806	84.434	74.5255	69.8914	82.5664	72.6675	73.3398	60.9819	63.5607	64.7931	76.9797	79.7315	129.157	94.3326	77.3007	68.3006	67.2151	68.4396	81.1888	73.0173	75.5088	82.5905	76.3546	43.0562	42.6034				80.1354	94.3532	81.9232	68.6504	37.7471	53.2653	46.3661	68.6	37.5	52.9	47
Pr	6.62242	8.52042	8.17256	8.30245	9.50249	7.23102	8.09452	6.96655	6.86438	6.5479	7.78294	7.94067	13.7486	9.84369	8.25466	6.1697	6.22888	6.76437	8.90835	7.92394	7.50746	7.94802	8.50749	3.82819	3.59711				7.89031	9.61677	7.96177	8.03684	5.24734	6.7389	5.23809	7.84	5.35	6.7	5.36
Nd	23.56	28.161	28.2486	29.9867	35.7902	24.6224	29.3275	24.9585	24.1321	21.0588	26.0743	25.7815	45.8534	33.3358	28.6824	19.7707	18.7746	22.3315	31.5236	27.2571	24.1378	28.1388	29.43	10.3001	9.2849				25.9588	32.8843	27.7329	30.4683	24.3277	28.6854	19.227	30.5	24.5	28.7	19
Sm	4.48964	4.91077	4.93873	5.73621	7.28326	4.40254	5.81522	4.98772	4.91316	3.66392	4.72913	4.66273	7.12375	5.90165	5.50981	3.39033	3.03381	3.88878	6.12709	5.06784	4.12677	5.40671	5.51677	1.60319	1.18669				4.51722	5.99417	5.39115	5.53405	6.19547	6.66651	4.06916	5.49	6.07	6.58	4.3
Eu	0.782365	0.867148	0.890873	0.937318	1.26846	0.92107	1.1008	0.928274	0.91365	0.661382	0.862966	0.714959	1.43439	1.0266	0.995507	0.636633	0.55404	0.729279	1.0301	0.905702	0.708299	0.96934	0.913238	0.224064	0.254042				0.7822	1.02029	0.948564	1.53279	2.13095	2.00006	0.640832	1.54	2.07	1.96	0.66
Gd	3.67233	4.12733	4.60415	5.3849	6.67681	3.97706	5.28866	4.51666	4.38891	3.50803	4.23959	3.94287	5.34425	5.11378	4.85176	3.02753	2.75387	3.46243	5.16867	4.6085	3.51282	4.52981	4.8233	1.49445	0.96846				4.07078	5.07948	4.21905	4.69692	6.18585	6.72635	3.62311	4.52	6.24	6.75	3.7
Tb	0.659941	0.704207	0.765777	0.962958	1.16327	0.655033	0.891239	0.804608	0.747652	0.601411	0.743813	0.721972	0.838935	0.89777	0.875945	0.509277	0.474839	0.626781	0.969251	0.799839	0.648283	0.777668	0.848081	0.277592	0.168621				0.710633	0.875981	0.783137	0.652754	0.970341	1.06862	0.606784	0.64	0.92	1.07	0.66
Dy	3.88509	4.24995	4.6441	5.91063	7.492	3.99644	5.63752	4.90162	4.60114	3.81211	4.49224	4.45459	4.87314	5.51992	5.47736	3.26961	2.91426	3.83993	6.06974	5.08963	4.00185	4.68741	5.24241	1.91653	1.07508				4.50486	5.57303	4.75137	3.56905	5.43857	6.59119	3.80556	3.47	5.31	6.41	4.1
Ho	0.789009	0.847496	0.958172	1.18022	1.57905	0.823448	1.14176	0.972321	0.948858	0.79047	0.963366	0.920562	0.96011	1.15053	1.13402	0.708809	0.655822	0.809973	1.24209	1.05312	0.831688	0.947706	1.04841	0.496821	0.250377				0.962319	1.16301	0.986584	0.671172	0.984121	1.2966	0.781172	0.65	0.98	1.28	0.82
Er	2.20845	2.53364	2.73471	3.45557	4.93306	2.46101	3.25881	3.00522	2.73817	2.47205	2.89976	2.8567	2.83652	3.57363	3.49776	2.21349	2.06955	2.50267	3.65935	3.1827	2.65644	2.88675	3.07868	1.71421	0.929759				2.98151	3.61156	2.97354	1.87874	2.55398	3.63874	2.29304	1.81	2.54	3.66	2.35
Tm	0.36366	0.399032	0.438129	0.572654	0.822834	0.428607	0.508368	0.480338	0.441658	0.429799	0.47848	0.470953	0.453544	0.560077	0.571504	0.380146	0.366099	0.401842	0.598752	0.50365	0.464196	0.454645	0.495256	0.340849	0.192672				0.486683	0.566807	0.456971	0.266121	0.342121	0.520261	0.373498	0.26	0.33	0.54	0.37
Yb	2.46596	2.64797	2.93698	3.6185	5.64139	3.01549	3.30547	3.19393	2.9582	3.06091	3.21614	3.3167	3.09197	3.8342	3.94741	2.68849	2.56217	2.8103	4.06539	3.4702	3.17262	3.12174	3.17927	2.68596	1.53806				3.39208	3.82097	3.0018	1.63248	2.03249	3.40788	2.53266	1.62	2	3.38	2.6
Lu	0.378717	0.394637	0.424811	0.56295	1.02855	0.556034	0.505686	0.471822	0.412635	0.521779	0.532198	0.549467	0.49505	0.61524	0.626977	0.430259	0.428724	0.450138	0.587628	0.512798	0.492304	0.433225	0.444904	0.512958	0.309326				0.594072	0.663897	0.491027	0.247591	0.285846	0.496708	0.394677	0.247	0.274	0.503	0.4
Hf	3.92098	4.89316	5.22065	3.83558	10.0848	5.80872	4.53389	4.66269	3.78594	3.68669	4.49704	3.77423	4.2623	4.6619	4.16381	3.50606	3.45029	3.77251	4.38083	4.56861	3.82536	4.36576	4.26145	2.89232	2.23486				4.14324	4.64634	4.77945	5.15622	4.48522	4.89502	5.94503	5	4.36	4.9	6.2
Ta	1.31616	1.12286	1.22112	1.28019	1.46744	0.700032	0.878994	1.07553	1.15311	1.16791	0.984677	1.13817	0.765972	1.22101	1.22508	0.9532	0.984533	0.874882	1.13938	1.12369	1.08302	1.03797	1.19763	1.29595	0.846037				1.1836	1.24758	1.07372	0.840081	1.18043	0.793927	0.929274	0.87	1.14	0.78	0.95
Pb	20.1774	20.2497	19.2379	25.2917	44.5156	13.9231	40.3714	19.6675	21.0242	21.0682	18.663	20.1186	54.5954	18.0727	19.8362	21.2874	22.6918	19.5352	15.4101	17.4837	18.5072	28.016	48.2254	35.8192	24.4923				20.0919	18.0475	27.7458	13.0894	1.53439	9.98945	20.3773	13.2	1.6	11	19.2713
Th	48.0313	31.0535	39.2649	11.8163	16.0349	22.7136	15.0182	21.2907	19.9714	23.4596	24.473	21.2779	26.0352	20.8698	26.2851	28.2349	30.7767	31.6537	20.6514	15.7232	29.8248	18.7635	19.8682	40.4357	28.5058				22.547	20.8786	18.5473	6.21291	1.25351	5.91573	14.7612	6.1	1.22	5.7	15.1
U	3.66682	2.17951	6.24515	5.81122	9.30337	4.83807	1.79834	3.47414	2.80914	3.01579	2.65101	2.05417	2.22009	3.29424	3.32094	2.20132	3.62151	3.01812	1.95754	2.24732	3.42934	2.93494	2.26092	4.81483	3.631				2.08941	3.18757	2.93004	1.9067	0.438446	1.7136	5.70149	1.86	0.403	1.69	5.8
Sr/Y	7.75968	8.02958	7.32914	5.34277	3.92584	5.78602	5.16208	6.26099	6.8039	4.42041	5.75601	3.82107	4.99854	3.79263	3.57719	3.9834	4.12776	4.8913	3.62497	4.57835	3.84799	4.94772	5.84607	1.51242	4.93345
La/Yb	10.1001	17.4743	12.7033	8.29194	6.89161	13.0964	11.2185	9.6688	10.4862	12.0384	13.1703	13.5711	22.2932	13.0968	10.2193	13.306	15.6709	13.5598	10.1403	11.3282	13.4601	11.4145	12.6255	9.58695	18.3693

## Sheet: S5 Compiled igneous rocks
Table S5. Compiled GPS positions and zircon U-Pb age data of the magmatic rocks from the central and southern Lhasa subterranes.
Location	Label	Lithology	Longitude	Latitude	SiO2	Age	Distance to the YTS	Distance to the BNS	Zircon εHf(t)	Literature
CLT-A1	11B-60	Granodiorite	81.5367	32.409	64.6	156.4	147	56	-13.0 to -10.2	Cao et al., 2016
CLT-A1	11B-56	Granodiorite	81.4513	32.4215	62.85	155.3	143	58	-13.1 to -9.5	Cao et al., 2016
CLT-A1	11BH-31-1	Granite	81.273	32.1844	71.45	130.5	111	89	-2.4 to -0.8	Cao et al., 2016
CLT-A1	11B-62	Granodiorite	81.2216	32.5553	62.8	155.6	140	51	-15.8 to -10.4	Cao et al., 2016
CLT-A1	11B-53	Diorite	80.9505	32.5543	61.97	155	117	61	-13.5 to -8.5	Cao et al., 2016
CLT-A1	11B-51	Diorite	80.7098	32.3761	60.92	150	85	87	-16.4 to -13.4	Cao et al., 2016
CLT-A1	11B-50	Diorite	80.642	32.3895	59.01	154.5	84	85	-14.8 to -11.8	Cao et al., 2016
CLT-A1	11B-49	Diorite	80.5734	32.3872	62.6	163.6	80	92	-16.4 to -13.4	Cao et al., 2016
CLT-A1	11B-38	Diorite	80.4036	32.551	58.77	149.3	86	79	-14.5 to -9.3	Cao et al., 2016
CLT-A1	11B-37	Diorite	80.2905	32.5411	60.71	159.4	79	82	-17.0 to -10.1	Cao et al., 2016
CLT-A1	11BH-35	Diorite	80.2084	32.069	77.97	149.7	33	135	-19.1 to -4.9	Cao et al., 2016
CLT-A1	11B-34	Diorite	80.1859	32.5521	60.82	156.3	69	84	-15.7 to -11.2	Cao et al., 2016
CLT-A1	11B-33	Diorite	80.1842	32.5596	60.06	152.1	70	83	-9.9 to -7.0	Cao et al., 2016
CLT-A1	BB16	Syenogranite	81.4274	32.1521	74.09	144	116	88	-4.4 to -1.2	Jiang et al., 2010
CLT-A1	JB1	Granodiorite	80.6726	32.5017	61.34	170	96	76	-17.2 to -13.8	Jiang et al., 2010
CLT-A1	ZZ1601	Granodiorite	80.5879	32.3785	62.72	163	80	95	-17.2 to -14.0	Qi et al., 2019
CLT-A1	ZZ1623	Granodiorite	80.5315	32.2732	69.71	142	68	106	-4.2 to -0.2	Qi et al., 2019
CLT-A1	ZZ1614	Granite	80.4706	32.2958	75.64	146	66	105	-8.6 to -4.9	Qi et al., 2019
CLT-A1	LX10-4-2	Granodiorite	81.0673	32.5645	63.62	172.1	123	55	-17.8 to -10.8	Wang et al., 2017c
CLT-A1	LX05-11-1	Tonalite	80.95	32.5658	61.33	155.9	118	60	-13.2 to -6.8	Wang et al., 2017c
CLT-A1	T11h1	Rhyolites	79.945	32.6344	70.3	147.7	55	84	-9.6 to -6.9	Wu et al., 2021
CLT-A1	DJD01-1	Granodiorite-porphyry(dyke)	81.2747	32.1853	69.94	136.64	112	88	-4.6 to -2.3	Zheng et al., 2018
CLT-A1	DJD02-1	Granite	81.2747	32.1853	70.31	142.23	112	88	-2.2 to -0.5	Zheng et al., 2018
CLT-A1	12SDN26G	Andesite	80.25	32.55	58.51	160.6	73	86	-16.6 to -12.0	Liu et al., 2018
CLT-A1	15LSDN22	Andesite	80.25	32.55	54.07	160.6	73	86		Liu et al., 2018
CLT-A1	BB1601	Granite porphyry	81.3204	32.1783	73.84	147	114	87		Yan, 2019
CLT-A1	BB1606	Granite	81.3008	32.1795	73.96	145	113	88		Yan, 2019
CLT-A1	BB1615	Monzogranite	81.275	32.1855	70.06	138	112	88		Yan, 2019
CLT-A1	SQ1643	Granite	80.6604	32.3978	65.47	163	86	84		Yan, 2019
CLT-A1	SQ1603	Diorite	80.575	32.5326	54.42	156	97	73		Yan, 2019
CLT-A1	SQ1640	Diorite	80.6978	32.3889	59.14	161	88	84		Tong et al., 2022
CLT-A1	SQ1611	Granodiorite	80.5395	32.5443	62.27	155	95	72		Tong et al., 2022
CLT-A1	SQ1624	Diorite	80.2299	32.5456	61.52	166	71	83		Tong et al., 2022
CLT-A1	SQ1626	Diorite	80.2267	32.5475	60.74	163	75	83		Tong et al., 2022
CLT-A1	D13-01	Granodiorite	80.9167	32.6667	61.96	155.6	124	48		Du et al., 2011
CLT-A1	BGH-123	Diorite porphyrite	80.1848	32.5596	56.98	159.4	70	82		Qu et al., 2009
CLT-A2	GJ0612	Rhyolite	82.2007	32.0403	77.91	129	141	76	-7.7 to -5.3	Zhu et al., 2009a
CLT-A2	GJ0612	Rhyolite	82.2007	32.0403	77.91	139	141	76	-7.9 to -4.8	Zhu et al., 2009a
CLT-A2	GJ0611	Rhyolite	82.2007	32.0403	74.39	143	140	76	-11.5 to -4.9	Zhu et al., 2009a
CLT-A2	XB5	Granite	82.1873	31.8294	77.85	149	123	98	-11.8 to -6.6	Jiang et al., 2010
CLT-A2	08YR16	Rhyolite	82.1758	31.6803	73.35	142.9	107	115	-7.1 to -1.6	Zhu et al., 2011
CLT-A2	08YR11	Tonalite	82.153	31.7302	63.59	134.3	112	109	-9.9 to -7.7	Zhu et al., 2011
CLT-A2	08YR09	Dacite	82.1404	31.79	66.67	159.8	117	102	-16.7 to -14.1	Zhu et al., 2011
CLT-A2	08YR07	Rhyolite	82.1401	31.803	75.99	146.1	118	101	-10.9 to -8.4	Zhu et al., 2011
CLT-A2	08YR14	Rhyolitic breccia	82.1666	31.6922		133.8	108	113	-11.5 to -4.3	Zhu et al., 2011
CLT-A3	14RD01	Granodiorite	83.6664	31.6457	68.97	156	159	90	-9.5 to -7.9	This study
CLT-A3	14MM34	Granodiorite	83.5995	31.9595	66.22	145	175	57	-13.9 to -7.9	This study
CLT-A3	14MM19	Monzogranite	83.5452	31.9294	73.87	146	166	61	-7.7 to -6.2	This study
CLT-A3	14MM26	Monzogranite	83.5549	31.9451	75.04	146	169	58	-8.8 to -6.8	This study
CLT-A3	14MM27	Monzogranite	83.5732	31.9587	74.09	141	174	56	-8.2 to -5.9	This study
CLT-A3	14MM37	Monzogranite	83.7963	31.9051	70.58	144	189	58	-10.4 to -4.8	This study
CLT-A3	14MM18	Syenogranite	83.5438	31.9263	78.06	141	166	61	-7.7 to -6.1	This study
CLT-A3	11BH-102	Granite porphyry	84.0417	31.8578	72.2	141.6	194	58	-11.2 to -7.0	Cao et al., 2016
CLT-A3	11BH-104	Granodiorite	83.9714	31.7887	65.24	136.9	183	66	-7.2 to -3.7	Cao et al., 2016
CLT-A3	11BH-106	Granodiorite	83.9369	31.6855	68.41	130.4	170	78	-6.6 to -2.7	Cao et al., 2016
CLT-A3	11BH-60	Granite	83.0242	32.092	68.98	149.4	169	50	-14.4 to -9.0	Cao et al., 2016
CLT-A3	T19h1	Granite	83.7856	31.9097	75.8	144.3	190	57	-11.7 to -8.0	Wu et al., 2021
CLT-A3	D15-01	Granodiorite	83.9167	31.3333	65.94	134.07	136	114		Du et al., 2011
CLT-A4	16T332	Rhyolite	89.4667	30.7	74.9	129.5	163	121	-6.9 to 0.1	Tang et al., 2020
CLT-A4	17T100	Andesite	89.4	30.7333	57.8	158.7	173	119	-2.0 to 2.1	Tang et al., 2020
CLT-A4	16T307	Andesite	89.3917	30.75	54.7	161.4	175	117	-5.5 to 1.1	Tang et al., 2020
CLT-A4	16T320	Andesite	89.3917	30.725	62.8	135.4	172	119	-9.6 to -5.0	Tang et al., 2020
CLT-A4	16T325	Dacite	89.3833	30.7167	68.2	128.9	170	121	-6.8 to -0.6	Tang et al., 2020
CLT-A5	ZK1106-35.5	Monzogranite	91.9208	30.1825	71.81	147.4	99	155	-12.1 to -8.1	Leng et al., 2022
CLT-A5	ZK1106-49	Granodiorite	91.9492	30.2003	66.48	140.6	102	153	-12.4 to -8.6	Leng et al., 2022
CLT-A5	MB05-7	Monzogranite	92.326	30.1011	71.64	129.9	98	176	-7.0 to -5.6	Zhu et al., 2011
CLT-A5	MB01-1	Tonalite	92.3234	30.1536	62.83	154	104	170	-14.1 to -11.6	Zhu et al., 2011
CLT	DX2-1	Dacite	84.9347	31.4585	66.48	130	179	88		Zhu et al., 2008
CLT	SZ43	Rhyolite	87.9303	30.8323	72.66	129	182	133		Zhu et al., 2009a
CLT	MD01-1	Syenogranite	85.1304	30.6459	74.02	152.9	91	175		Zhu et al., 2011
CLT	XR1111	Diorite	86.3919	30.3979	54.07	155.7	116	193		Yan et al., 2017
CLT	XR1114	Monzogranite	86.3801	30.4072	69.34	155.1	117	192		Yan et al., 2017
CLT	D9213-b3	Quartz diorite	86.75	30.3833	61.62	154.5	118	191		Zhou et al., 2021
CLT	D9215-b1	Monzogranite	86.7333	30.3667	73.02	157.4	113	193		Zhou et al., 2021
CLT	D9216-b1	Monzogranite	86.7167	30.35	73.61	157.2	111	194		Zhou et al., 2021
CLT	D9219-b1	Monzogranite	86.4	30.3833	68.78	158.4	114	194		Zhou et al., 2021
CLT	D9220-b3	Granodiorite	86.2833	30.45	67.24	154.1	116	187		Zhou et al., 2021
CLT	D9219-b6	Monzogranite	86.3833	30.4		158.8	116	192		Zhou et al., 2021
CLT	JG081203-4	Volcanic rocks	85.14	31.47		131	189	84		Volkmer et al., 2007
CLT	JG081203-2	Volcanic rocks	85.14	31.47		131	188	84		Volkmer et al., 2007
CLT	JV081603-1	Volcanic rocks	85.12	31.4		130	180	93		Volkmer et al., 2007
CLT	JG082103-3	Granitic rocks	85.09	31.52		153	192	79		Volkmer et al., 2007
CLT	JG082103-2	Granitic rocks	85.08	31.52		138	191	79		Volkmer et al., 2007
CLT	JG082103-1	Granitic rocks	85.08	31.51		159	190	79		Volkmer et al., 2007
CLT	JG082603-1	Granitic rocks	85.07	31.53		143	193	78		Volkmer et al., 2007
CLT	B0849-1	Two-micagranite	89.1167	30.0833	73.5104	226.5	97	195		Bu et al., 2015
CLT	B0853-1	Two-micagranite	89.1167	30.0833	74.038	225.7	97	195		Bu et al., 2015
CLT	09ZC-18	High Mg# adakitic rocks	85.3	31.6	67.9656	90.7	207	69		Chen et al., 2015
CLT	09ZC-2	Peraluminous granites	85.3	31.6	74.5052	93.8	207	69		Chen et al., 2015
CLT	09ZC-17	Peraluminous granites	85.3	31.6	72.1388	88	207	69		Chen et al., 2015
CLT	5103	Monzogranite	85.6667	30.7	73.5487	114	130	164		Huang et al., 2006
CLT	08FW65	Diorite	93.107	29.973	60.366	213.4	97	205		Ji, 2010
CLT	08FW57	Syenogranite	92.957	30.026	74.8193	209.6	100	201		Ji, 2010
CLT	08FW58	Granodiorite	92.983	30.015	74.4401	215.4	100	201		Ji, 2010
CLT	08FW59	Granite	93.083	29.996	73.0379	191	100	200		Ji, 2010
CLT	06ZN02	Volcanic rocks	88	31	64.5623	113.6	196	115		Kang et al., 2008
CLT	MB12-1	Granodiorite	92.1541	30.0753	68.6792	88.3	92	173		Meng et al., 2010
CLT	MB14-4	Granodiorite	92.1541	30.0731	67.4155	83.7	92	173		Meng et al., 2014
CLT	MB14-2	Dioriticenclave	92.1541	30.0731	58.2322	85.2	92	173		Meng et al., 2014
CLT	14ZGP03	Granodiorite	87.5144	31.4801	74.1537	101.2	243	65		Shuai et al., 2021
CLT	14ZGP14	Granodiorite	87.688	31.4292	77.2377	100.3	238	70		Shuai et al., 2021
CLT	14ZGP04	Monzogranite	87.5967	31.4629	77.0259	100.8	244	67		Shuai et al., 2021
CLT	14ZGP01	Monzogranite	87.5065	31.4826	77.2417	99.9	243	65		Shuai et al., 2021
CLT	14ZGP06	Syenogranite	87.6067	31.4576	77.7835	99.8	244	67		Shuai et al., 2021
CLT	LS-P	Dacite	84.9666	31.9637	67.2885	89.8	237	31		Sun et al., 2015
CLT	LS-74	Dacite	84.9666	31.9637	66.2492	86.8	237	31		Sun et al., 2015
CLT	B2186-1	Monzogranite	88.85	30.0667	73.2788	228.2	103	209		Wang et al., 2014
CLT	11CQ05-6	Dioritic porphyrite	85.6333	30.6833	56.59	113.9	130	167		Wang et al., 2018
CLT	11CQ05-1	Granodiorite	85.6333	30.6833	68.2768	113.1	130	167		Wang et al., 2018
CLT	11CQ05-10	Dioritic enclave	85.6333	30.6833	62.9	113.9	130	167		Wang et al., 2018
CLT	09ZC-15	High Mg# adakitic rocks	85.3	31.6	66.7272	92.1	206	69		Yu et al., 2011
CLT	T457	Granodiorite	89.207	29.9743	66.491	202	82	207		Zhang et al., 2007a
CLT	T450	Two-micagranite	89.1173	30.0853	72.9484	205	97	196		Zhang et al., 2007a
CLT	NX5-2	Granodiorite	85.5308	30.761	68.1814	109	130	161		Zhang et al., 2010
CLT	NX5-3	Dioritic enclave	85.5308	30.761	58.0838	108	130	161		Zhang et al., 2010
CLT	08CQ28	Monzogranite	84.4634	30.9128	72.858	113	115	153		Zhang et al., 2012
CLT	08CQ29	Syenogranite	84.4634	30.9128	76.7966	112	115	153		Zhang et al., 2012
CLT	08CQ32	Dioritic enclave	84.4818	30.9252	60.164	115	117	151		Zhang et al., 2012
CLT	13NML04-2	Granodiorite	89.1374	30.0999	66.1663	204.9	100	193		Zhang et al., 2019b
CLT	13NML02-1	Two-micagranite	89.0889	30.1442	75.0706	221	105	191		Zhang et al., 2019b
CLT	13NML06-1	Two-micagranite	89.1173	30.1381	74.323	212.5	105	190		Zhang et al., 2019b
CLT	DX19-1	Granodiorite	85.1262	31.2818	71.522	107	169	105		Zhou et al., 2008
CLT	13RKZ-9A	Granite	89.0569	30.1006	74.5285	205.2	102	196		Zhou et al., 2017
CLT	13RKZ-9B	Gneissxenolith	89.0569	30.1006	60.8257	221	102	196		Zhou et al., 2017
CLT	13RKZ-9D	Gneissxenolith	89.0569	30.1006	61.0746	220.8	102	196		Zhou et al., 2017
CLT	13RKZ-9H	Gneissxenolith	89.0569	30.1006	63.5097	211.8	102	196		Zhou et al., 2017
CLT	SZ48	Andesite	87.9303	30.841	61.6663	111	183	131		Zhu et al., 2009a
CLT	DX13-1	Dacite	85.1787	31.5013	69.4813	121	198	81		Zhu et al., 2009a
CLT	SZ52	Dacite	87.9303	30.841	66.7935	107	186	131		Zhu et al., 2009a
CLT	DX21-1	Rhyolite	85.117	31	75.7698	111	148	136		Zhu et al., 2009a
CLT	DXL1-3	Rhyolitictuff	85.195	31.6552	78.031	112	213	63		Zhu et al., 2009a
CLT	NX5-3	Diorite	85.5308	30.761	58.0838	108	129	161		Zhu et al., 2009a
CLT	SZ39	Graniteporphyry	87.9307	30.8285	77.2755	125	180	134		Zhu et al., 2009a
CLT	GB-8	Granodiorite	85.5375	30.7593	70.4592	116	134	160		Zhu et al., 2009a
CLT	NX5-2	Granodiorite	85.5308	30.761	68.1814	109	133	161		Zhu et al., 2009a
CLT	SQ0666	Andesite	80.0263	32.3433		102	53	109		Zhu et al., 2009a
CLT	CMN04-2	Rhyolite	85.9082	31.3508		125	210	90		Zhu et al., 2009a
CLT	SZ08-1	Diorite	88.8438	30.7728		111	180	131		Zhu et al., 2009a
CLT	SZ08-3	Granodiorite	88.8438	30.7728		113	180	131		Zhu et al., 2009a
CLT	NML06-1	Two-micagranite	89.1577	30.109	74.9322	206.5	100	192		Zhu et al., 2011
CLT	NML05-1	Two-micagranite	89.1167	30.0847	73.9464	206	98	195		Zhu et al., 2011
CLT	MB22-1	Syenogranite	91.906	29.9847	77.9826	194.9	82	175		Zhu et al., 2011
CLT	JD08-1	Monzogranite	93.0775	29.999	73.882	182.9	101	200		Zhu et al., 2011
CLT	MB09-1	Granodiorite	92.2295	30.1007	67.1961	210.2	97	172		Zhu et al., 2011
CLT	JD12-1	Granodiorite	92.9615	30.0208	69.4252	193.2	101	200		Zhu et al., 2011
CLT	SZ01-1*	Dacite	88.9223	30.7563	67.4612	116.7	183	129		Zhu et al., 2011
CLT	GRC02-1	Dacite	88.2068	31.0663	66.3551	114	206	107		Zhu et al., 2011
CLT	GRC03-2	Dacite	88.1268	31.2262	67.5637	113.8	224	90		Zhu et al., 2011
CLT	SZ10-1	Dacite	88.6623	30.89	66.1161	112.1	191	119		Zhu et al., 2011
CLT	SZ07-1	Dacite	88.9013	30.766	65.1518	110.9	184	129		Zhu et al., 2011
CLT	08CQ35	Monzogranite	84.5713	30.9391	74.4268	123	118	152		Zhu et al., 2011
SLT	XRX-3	Granodiorite	88.6875	29.366		178				Guo et al., 2013
SLT	XRX-37	Granodiorite	88.7242	29.3647		170				Guo et al., 2013
SLT	XRX-38	Porphyritic granodiorite	88.7295	29.3637		168				Guo et al., 2013
SLT	XRX-40	Epidotized granodiorite	88.8445	29.3697		172				Guo et al., 2013
SLT	06FW167	Monzogranite	89.6319	29.4397		155.9				Ji et al., 2009
SLT	06FW168	Hb-diorite	89.6319	29.4397		174.2				Ji et al., 2009
SLT	06FW169	Syenogranitic dike	89.6319	29.4397		151.8				Ji et al., 2009
SLT	TS1-03	Rhyolite	90.9865	29.3443		137.1				Wang et al., 2017a
SLT	TS1-04	Rhyolite	90.9865	29.3443		134.4				Wang et al., 2017a
SLT	TS1-09	Rhyolite	90.9865	29.3443		129.5				Wang et al., 2017a
SLT	T09-15-1	Granodiorite	92.2	29.2		173				Wang et al., 2017b
SLT	RT06-01	Granodiorite	88.39	29.41		168				Wang et al., 2017b
SLT	5057-282-300	Granodiorite	88.4	29.4		169.5				Wang et al., 2017b
SLT	RT06-S02	Granodiorite	88.41	29.39		172.2				Wang et al., 2017b
SLT	X6078-22	Granodiorite	88.41	29.39		173.7				Wang et al., 2017b
SLT	5001-X701	Diorite	88.41	29.39		167.3				Wang et al., 2017b
SLT	RT06-03	Qtz-monzonite	88.43	29.37		142.6				Wang et al., 2017b
SLT	RT06-21	Grano-diorite	88.59	29.37		168.8				Wang et al., 2017b
SLT	RT06-16	Grano-diorite	88.76	29.36		170.3				Wang et al., 2017b
SLT	T1011-A	Gabbroic gneiss	94.1167	29.2		146.3				Wang et al., 2020
SLT	T1011-A	Granitic gneiss	94.1167	29.2		141.7				Wang et al., 2020
SLT	T384	Biotite-monzogranite	90.1912	29.356		178				Zhang et al., 2007b
SLT	17YW16	Monzogranite	85.926	30.241		155				Zhang et al., 2019a
SLT	09FW72	Andesite	91.7072	29.2434		159.6				Zhang et al., 2014
SLT	ZD01	Tonalite	91.779	29.2329		158.5				Zhang et al., 2014
SLT	09FW95	Granodiorite	91.684	29.244		155.5				Zhang et al., 2014
SLT	09FW81	Hornblendite	91.684	29.244		157.4				Zhang et al., 2014
SLT	09FW90	Hornblende-bearing gabbro	91.684	29.244		155.9				Zhang et al., 2014
SLT	09FW94	Gabbro	91.684	29.244		157.5				Zhang et al., 2014
SLT	T16-77-6	Grt-rich leucosome	94.0999	29.2106		154.6				Zhang et al., 2021
SLT	T17-1-26	Ep Amp gneiss	94.0999	29.2106		166.4				Zhang et al., 2021
SLT	D120303	Bt gneiss	94.1068	29.2403		174.9				Zhang et al., 2021
SLT	T17-1-25	Ep Amp gneiss	94.1431	29.2061		161.2				Zhang et al., 2021
SLT	D350613	Ep Bt gneiss	94.1895	29.219		159.9				Zhang et al., 2021
SLT	D350612	Ep amphibolite	94.192	29.2224		174.7				Zhang et al., 2021
SLT	T07-50-2	Grt Ep gneiss	94.3203	29.346		164.9				Zhang et al., 2021
SLT	MM02-3	Andesite	91.9755	29.2535		136.5				Zhu et al., 2009b
Reference
Bu, T., Wei, Q.R., Ding, P.F., Wang, C., Liu, X.N., Zhang, X.Q., Sun, J., and Wang, J.Y., 2015, LA-ICP-MS zircon U-Pb ages and petrogenesis of Rindu intrusion near Namling, middle Gangdese magmatic belt [in Chinese with English abstract]: Geological Bulletin of China, v. 34, p. 2254–2265.
Cao, M., Qin, K., Li, G., Li, J., Zhao, J., Evans, N.J., and Hollings, P., 2016, Tectono-magmatic evolution of Late Jurassic to Early Cretaceous granitoids in the west central Lhasa subterrane, Tibet: Gondwana Research, v. 39, p. 386–400, https://doi.org/10.1016/j.gr.2016.01.006.
Chen, J.-L., Xu, J.-F., Yu, H.-X., Wang, B.-D., Wu, J.-B., and Feng, Y.-X., 2015, Late Cretaceous high-Mg# granitoids in southern Tibet: Implications for the early crustal thickening and tectonic evolution of the Tibetan Plateau?: Lithos, v. 232, p. 12–22, https://doi.org/10.1016/j.lithos.2015.06.020.
Du, D.D., Qu, X.M., Wang, G.H., Xin, H.B., and Liu, Z.B., 2011, Bidirectional subduction of the Middle Tethys oceanic basin in the west segment of Bangonghu-Nujiang suture, Tibet: evidence from zircon U-Pb LAICPMS dating and petrogeochemistry of arc granites [in Chinese with English abstract]: Acta Petrologica Sinica, v. 27, p. 1993–2002.
Guo, L., Liu, Y., Liu, S., Cawood, P.A., Wang, Z., and Liu, H., 2013, Petrogenesis of Early to Middle Jurassic granitoid rocks from the Gangdese belt, Southern Tibet: Implications for early history of the Neo-Tethys: Lithos, v. 179, p. 320–333, https://doi.org/10.1016/j.lithos.2013.06.011.
Huang, J.P., and Cao, S.H., 2006, Geological characteristics and tectonic significance for late Jurassic-early Cretaceous granite in middle Gangdese, Tibet: Resources survey＆ Environment, v. 27, p. 279–285.
Ji, W.-Q., Wu, F.-Y., Chung, S.-L., Li, J.-X., and Liu, C.-Z., 2009, Zircon U–Pb geochronology and Hf isotopic constraints on petrogenesis of the Gangdese batholith, southern Tibet: Chemical Geology, v. 262, p. 229–245, https://doi.org/10.1016/j.chemgeo.2009.01.020.
Ji, W.Q., 2010, Geochronology and Petrogenesis of Granitic Rocks from East Segment of the Gangdese Batholith, Southern Tibet [Ph.D. thesis]: Beijing, China, Institute of Geology and Geophysics, Chinese Academy of Sciences [in Chinese with English abstract], 146 p.
Jiang, X., Zhao, Z.D., Zhu, D.C., Zhang, F.Q., Dong, G.C., Mo, X.X., and Guo, T.Y., 2010, Zircon U-Pb geochronology and Hf isotopic geochemistry of Jiangba, and Xiongba granitoids in western Gangdese, Tibet [in Chinese with English abstract]: Acta Petrologica Sinica, v. 26, p. 2155–2164.
Kang, Z.Q., Xu, J.F., Dong, Y.H., and Wang, B.D., 2008, Cretaceous volcanic rocks of Zenong Group in north-middle Lhasa block: products of southward subducting of the Slainajap Ocean? [in Chinese with English abstract]: Acta Petrologica Sinica, v. 24, p. 303–314.
Leng, Q.F., Li, W.C., Dai, C.L., Zhang, X.F., Wu, S.Y., and Cao, H.W., 2022, Genesis and tectonic setting of Late Jurassic-Early Cretaceous granites in Nachatang area, Central Lhasa Terrane: Constraints from geochemistry, chronology and Hf isotopes [in Chinese with English abstract]: Acta Petrologica Sinica, v. 38, p. 209–229, https://doi.org/10.18654/1000.0569/2022.01.14.
Liu, W.-L., Huang, Q.-T., Gu, M., Zhong, Y., Zhou, R., Gu, X.-D., Zheng, H., Liu, J.-N., Lu, X.-X., and Xia, B., 2018, Origin and tectonic implications of the Shiquanhe high-Mg andesite, western Bangong suture, Tibet: Gondwana Research, v. 60, p. 1–14, https://doi.org/10.1016/j.gr.2018.03.017.
Meng, F.-Y., Zhao, Z., Zhu, D.-C., Mo, X., Guan, Q., Huang, Y., Dong, G., Zhou, S., DePaolo, D.J., Harrison, T.M., Zhang, Z., Liu, J., Liu, Y., Hu, Z., and Yuan, H., 2014, Late Cretaceous magmatism in Mamba area, central Lhasa subterrane: Products of back-arc extension of Neo-Tethyan Ocean?: Gondwana Research, v. 26, p. 505–520, https://doi.org/10.1016/j.gr.2013.07.017.
Meng, F.Y., Zhao, Z.D., Zhu, D.C., Zhang, L.L., Guan, Q., Liu, M., Yu, F., and Mo, X.X., 2010, Petrogenesis of Late Cretaceous adakite-like rocks in Mamba from the eastern Gangdese, Tibet [in Chinese with English abstract]: Acta Petrologica Sinica, v. 26, p. 2180–2192.
Qi, N.Y., Zhao, Z.D., Tang, Y., Yan, J.J., Shi, Q., S, Liu, D., Zhu, D.C., and Sheikh, L., 2019, Geochronology, geochemistry and petrogenesis of the Late Jurassic-Early Cretaceous granitoids in Zuozuo, western Central Lhasa Terrane, Tibet [in Chinese with English abstract]: Acta Petrologica Sinica, v. 35, p. 405–422.
Qu, X.M., Wang, R.J., Xin, H.B., Zhao, Y.Y., and Fan, X.T., 2009, Geochronology and geochemistry of igneous rocks related to the subduction of the Tethys oceanic plate along the Bangong Lake arc zone, the western Tibetan Plateau [in Chinese with English abstract]: Geochimica et Cosmochimica Acta, v. 38, p. 523–535.
Shuai, X., Li, S.-M., Zhu, D.-C., Wang, Q., Zhang, L.-L., and Zhao, Z., 2021, Tetrad effect of rare earth elements caused by fractional crystallization in high-silica granites: An example from central Tibet: Lithos, v. 384–385, p. 105968, https://doi.org/10.1016/j.lithos.2021.105968.
Sun, G.-Y., Hu, X.-M., Zhu, D.-C., Hong, W.-T., Wang, J.-G., and Wang, Q., 2015, Thickened juvenile lower crust-derived ~ 90 Ma adakitic rocks in the central Lhasa terrane, Tibet: Lithos, v. 224–225, p. 225–239, https://doi.org/10.1016/j.lithos.2015.03.010.
Tang, Y., Zhai, Q.-G., Hu, P.-Y., Chung, S.-L., Xiao, X.-C., Wang, H.-T., Zhu, Z.-C., Wang, W., Wu, H., and Lee, H.-Y., 2020, Southward subduction of the Bangong-Nujiang Tethys Ocean: insights from ca. 161–129 Ma arc volcanic rocks in the north of Lhasa terrane, Tibet: International Journal of Earth Sciences, v. 109, p. 631–647, https://doi.org/10.1007/s00531-020-01823-x.
Tong, X., Yan, J., Zhao, Z., Niu, Y., Qi, N., Shi, Q., Liu, D., Wang, Q., Zhang, L.-L., Dong, G., and Zhu, D.-C., 2022, Middle-Late Jurassic magmatism in the west central Lhasa subterrane, Tibet: Petrology, zircon chronology, elemental and Sr-Nd-Pb-Hf-Mg isotopic geochemistry: Lithos, v. 408–409, no. 106549, https://doi.org/10.1016/j.lithos.2021.106549.
Volkmer, J.E., Kapp, P., Guynn, J.H., and Lai, Q., 2007, Cretaceous-Tertiary structural evolution of the north central Lhasa terrane, Tibet: Tectonics, v. 26, no. TC6007, https://doi.org/10.1029/2005TC001832.
Wang, C., Ding, L., Liu, Z.-C., Zhang, L.-Y., and Yue, Y.-H., 2017a, Early Cretaceous bimodal volcanic rocks in the southern Lhasa terrane, south Tibet: Age, petrogenesis and tectonic implications: Lithos, v. 268–271, p. 260–273, https://doi.org/10.1016/j.lithos.2016.11.016.
Wang, C., Wei, Q.R., Liu, X.N., Ding, P.F., Bu, T., Sun, J., Zhang, X.Q., and Wang, J.Y., 2014, Post-Collision Related Late Indosinian Granites of Gangdese Terrane: Evidences from Zircon U-Pb Geochronology and Petrogeochemistry [in Chinese with English abstract]: Earth Science-Journal of China University of Geosciences, v. 39, p. 1277–1300, https://doi.org/10.3799/dqkx.2014.109.
Wang, H.T., Zeng, L.S., Xu, C.P., Gao, J.H., Zhao, L.H., Wang, Y.F., and Hu, Z.P., 2020, Petrogenesis and geodynamic significances of Late Jurassic-Cretaceous intrusion in the Mainling area, eastern Gangdese, southern Tibet [in Chinese with English abstract]: Acta Petrologica Sinica, v. 36, p. 3041–3062, https://doi.org/10.18654/1000-0569/2020.10.07.
Wang, Q., Zhu, D.-C., Liu, A.-L., Cawood, P.A., Liu, S.-A., Xia, Y., Chen, Y., Wang, H., Zhang, L.-L., and Zhao, Z.-D., 2018, Survival of the Lhasa Terrane during its collision with Asia due to crust-mantle coupling revealed by ca. 114 Ma intrusive rocks in western Tibet: Lithos, v. 304–307, p. 200–210, https://doi.org/10.1016/j.lithos.2018.01.006.
Wang, R., Tafti, R., Hou, Z.Q., Shen, Z.C., Guo, N., Evans, N.J., Jeon, H., Li, Q.Y., and Li, W.K., 2017b, Across-arc geochemical variation in the Jurassic magmatic zone, Southern Tibet: Implication for continental arc-related porphyry Cu Au mineralization: Chemical Geology, v. 451, p. 116–134, https://doi.org/10.1016/j.chemgeo.2017.01.010.
Wang, Y., Tang, J., Wang, L., Duan, J., Danzhen, W., Li, S., and Li, Z., 2017c, Petrogenesis of Jurassic granitoids in the west central Lhasa subterrane, Tibet, China: the Geji example: International Geology Review, v. 60, p. 1155–1171, https://doi.org/10.1080/00206814.2017.1375438.
Wu, H., Fan, J.-J., Jiang, Z.-Q., Hao, Y.-J., and Luo, A.-B., 2021, Late Jurassic–Early Cretaceous magmatic activity in the Central Lhasa Terrane: Petrogenesis and implications for the initial subduction of the Slainajap oceanic lithosphere: Palaeogeography, Palaeoclimatology, Palaeoecology, v. 573, no. 110438, https://doi.org/10.1016/j.palaeo.2021.110438.
Zhang X.Q., Zhu D.C., Zhao Z.D., Sui Q.L., Wang Q., Yuan S.H., Hu Z.C., and Mo X.X., 2012, Geochemistry, zircon U-Pb geochronology and in-situ Hf isotope of the Maiga batholith in Coqen, Tibet: Constraints on the petrogenesis of the Early Cretaceous granitoids in the central Lhasa Terrane [in Chinese with English abstract]: Acta Petrologica Sinica, v. 28, p. 1615–1634.
Yan J.J., 2019, Geochronology, Geochemistry and Petrogenesis of Mesozoic Magmatic Rocks in Shiquanhe Area, Tibetan Plateau [Ph.D. thesis]: Beijing, China, School of Earth Science and Resources, China University of Geosciences [in Chinese with English abstract], 160 p.
Yan, J.J., Zhao, Z.D., Liu, D., Wang, Z.Z., and Tang, Y., 2017, Geochemistry and petrogenesis of the Late Jurassic Xuru Tso batholith in central Lhasa Terrane, Tibet [in Chinese with English abstract]: Acta Petrologica Sinica, v. 33, p. 2437–2453.
Yu, H.X., Chen, J.L., Xu, J.F., Wang, B.D., Wu, J.B., and Liang, H.Y., 2011, Geochemistry and origin of Late Cretaceous (～ 90 Ma) ore-bearing porphyry of Balazha in mid-northern Lhasa terrane, Tibet [in Chinese with English abstract]: Acta Petrologica Sinica, v. 27, p. 2011–2022.
Zhang, H., Ji, W.Q., Zhang, S.H., Wang, J.G., and Wu, F.Y., 2019a, Zircon U-Pb age and Hf isotope of intrusive rocks from the Yawa area in the west part of southern Lhasa terrane, Tibet [in Chinese with English abstract]: Acta Petrologica Sinica, v. 35, p. 423–438, https://doi.org/10.18654/1000-0569/2019.02.10.
Zhang, H.F., Xu, W.C., Guo, J.Q., Zong, K.Q., Cai, H.M., and Yuan, H.L., 2007a, Indosinian orogenesis of the Gangdese terrane: evidences from zircon U-Pb dating and petrogenesis of granitoids [in Chinese with English abstract]: Earth Science-Journal of China University of Geosciences, v. 32, p. 155–166.
Zhang, H.F., Xu, W.C., Guo, J.Q., Zong, K.Q., Cai, H.M., and Yuan, H.L., 2007b, Zircon U–Pb and Hf isotopic composition of deformed granite in the southern margin of the Gangdese belt, Tibet: evidence for early Jurassic subduction of Neo-Tethyan oceanic slab [in Chinese with English abstract]: Acta Petrologica Sinica, v. 23, p. 1347–1353.
Zhang, L.-L., Liu, C.-Z., Wu, F.-Y., Ji, W.-Q., and Wang, J.-G., 2014, Zedong terrane revisited: An intra-oceanic arc within Neo-Tethys or a part of the Asian active continental margin?: Journal of Asian Earth Sciences, v. 80, p. 34–55, https://doi.org/10.1016/j.jseaes.2013.10.029.
Zhang, L.-X., Wang, Q., Zhu, D.-C., Li, S.-M., Zhao, Z.-D., Zhang, L.-L., Chen, Y., Liu, S.-A., Zheng, Y.-C., Wang, R., and Liao, Z.-L., 2019b, Generation of leucogranites via fractional crystallization: A case from the Late Triassic Luoza batholith in the Lhasa Terrane, southern Tibet: Gondwana Research, v. 66, p. 63–76, https://doi.org/10.1016/j.gr.2018.08.008.
Zhang, X.Q., Zhu, D.C., Zhao, T.D., Wang, L.Q., Hang, J.C., and Mo, X.X., 2010, Petrogenesis of the Nixiong Pluton in Coqen, Tibet and its potential sjgnifiance for the Nixiong Fe-rich mineraliza tion [in Chinese with English abstract]: Acta Petrologica Sinica, v. 26, p. 1793–1804.
Zhang, Z.-M., Ding, H.-X., Dong, X., Tian, Z.-L., Palin, R.M., Santosh, M., Chen, Y.-F., Jiang, Y.-Y., Qin, S.-K., Kang, D.-Y., and Li, W.-T., 2021, The Mesozoic magmatic, metamorphic, and tectonic evolution of the eastern Gangdese magmatic arc, southern Tibet: GSA Bulletin, https://doi.org/10.1130/B36134.1.
Zheng, H., Huang, Q.T., Cai, Z.R., Zhang, K.J., Liu, H.C., Cheng, C., Lu, L.J., Yang, P., Yu, S.R., and Yang, G., 2018, Early Cretaceous arc granitoids from the central Lhasa subterrane: Production of the northward subduction of Yarlung Zangbo Neo‐Tethyan Ocean?: Geological Journal, v. 54, p. 4001–4013, https://doi.org/10.1002/gj.3399.
Zhou, C.Y., Zhu, D.C., Zhao, Z.D., Xu, J.F., Wang, L.Q., Chen, H.H., Xie, L.W., Dong, G.C., and Zhou, S., 2008, Petrogenesis of Daxiong pluton in western Gangdese, Tibet: Zircon U-Pb dating and Hf isotopic constraints [in Chinese with English abstract]: Acta Petrologica Sinica, v. 24, p. 348–358.
Zhou, X.-Y., Zhang, Y.-X., Zhang, J.-H., Li, W.-Y., Liao, J., Huang, R.-C., Jin, X., Hu, J.-C., Khalid, S.B., and Zhu, L.-D., 2021, Genesis and multi-stage evolution of crustal magma: A case study of the Late Jurassic Xurucuo plutonic complex in the South Lhasa terrane, Tibet: Lithos, v. 380–381, no. 105869, https://doi.org/10.1016/j.lithos.2020.105869.
Zhou, X., Zheng, J.-P., Xiong, Q., Yang, J.-S., Wu, Y.-B., Zhao, J.-H., Griffin, W.L., and Dai, H.-K., 2017, Early Mesozoic deep-crust reworking beneath the central Lhasa terrane (South Tibet): Evidence from intermediate gneiss xenoliths in granites: Lithos, v. 274–275, p. 225–239, https://doi.org/10.1016/j.lithos.2016.12.035.
Zhu, D.-C., Mo, X.-X., Niu, Y., Zhao, Z.-D., Wang, L.-Q., Liu, Y.-S., and Wu, F.-Y., 2009a, Geochemical investigation of Early Cretaceous igneous rocks along an east–west traverse throughout the central Lhasa Terrane, Tibet: Chemical Geology, v. 268, p. 298–312, https://doi.org/10.1016/j.chemgeo.2009.09.008.
Zhu, D.-C., Zhao, Z.-D., Niu, Y., Mo, X.-X., Chung, S.-L., Hou, Z.-Q., Wang, L.-Q., and Wu, F.-Y., 2011, The Lhasa Terrane: Record of a microcontinent and its histories of drift and growth: Earth and Planetary Science Letters, v. 301, p. 241–255, https://doi.org/10.1016/j.epsl.2010.11.005.
Zhu, D.-C., Zhao, Z.-D., Pan, G.-T., Lee, H.-Y., Kang, Z.-Q., Liao, Z.-L., Wang, L.-Q., Li, G.-M., Dong, G.-C., and Liu, B., 2009b, Early cretaceous subduction-related adakite-like rocks of the Gangdese Belt, southern Tibet: Products of slab melting and subsequent melt–peridotite interaction?: Journal of Asian Earth Sciences, v. 34, p. 298–309, https://doi.org/10.1016/j.jseaes.2008.05.003.
Zhu, D.C., Mo, X.X., Zhao, Z.D., Xu, J.F., Sun, C.G., Zhou, C.Y., Wang, L.Q., Chen, H.H., Dong, G.C., and Zhou, S., 2008, Zircon U–Pb geochronology of Zenong Group volcanic rocks in Coqen area of the Gangdese, Tibet and tectonic significance [in Chinese with English abstract]: Acta Petrologica Sinica, v. 24, p. 401–412.

## Sheet: S6 Compiled sedimentary rocks
Table S6 GPS positions and detrital zircon U-Pb age (235 ~ 60 Ma) and εHf(t) of sedimentary rocks from Mesozoic strata in the Central and Southern Lhasa.
Location	Label	Lithology	Strata	Longitude	Latitude	Age (235 ~ 60 Ma)	Zircon εHf(t)	Literature
Central Lhasa	13GL98	Sandstone	Duoni Formation	85.4667	31.4667	178 ~ 116	-12.0 to -3.6	Sun et al., 2017
Central Lhasa	13GL105	Sandstone	Duoni Formation	85.4667	31.4667	203 ~ 103	-18.7 to -3.6	Sun et al., 2017
Central Lhasa	13GL140	Sandstone	Duoni Formation	85.4667	31.4667	230 ~ 105	-15.4 to 2.2	Sun et al., 2017
Central Lhasa	12ZN02	Sandstone	Duoni Formation	84.6667	31.8	175 ~ 113	-14.6 to -4.9	Sun et al., 2017
Central Lhasa	12XL109	Sandstone	Duoni Formation	84.6667	31.8	235 ~ 114	-12.2 to 9.6	Sun et al., 2017
Central Lhasa	15DX04	Conglomerate	Damxung Formation	91.3333	30.4167	116 ~ 108	-13.6 to 13.6	Wang et al., 2017a
Central Lhasa	15DX06	Conglomerate	Damxung Formation	91.3333	30.4167	118 ~ 109	-17.3 to -0.2	Wang et al., 2017a
Central Lhasa	15DX10	Conglomerate	Damxung Formation	91.3333	30.4167	114 ~ 107	-17.3 to -0.0	Wang et al., 2017a
Central Lhasa	15DX15	Conglomerate	Damxung Formation	91.3333	30.4167	136 ~ 108	-19.9 to -0.8	Wang et al., 2017a
Central Lhasa	15DX21	Conglomerate	Damxung Formation	91.3333	30.4167	141 ~ 107	-14.4 to -0.4	Wang et al., 2017a
Central Lhasa	15DX26	Conglomerate	Damxung Formation	91.3333	30.4167	130 ~ 109	-14.0 to -0.1	Wang et al., 2017a
Central Lhasa	15DX28	Conglomerate	Damxung Formation	91.3333	30.4167	193 ~ 113	-13.4 to -0.6	Wang et al., 2017a
Nouth belt of Southern Lhasa	YB03-1	Sandstone	Yeba Formation	91.2737	29.7432	212 ~ 166	-2.6 to 14.3	Deng et al., 2021
Nouth belt of Southern Lhasa	YB06-1	Sandstone	Yeba Formation	91.2781	29.7318	195 ~ 171	-16 to -1.3	Deng et al., 2021
Nouth belt of Southern Lhasa	XY10-3-1	Sandstone	Linbuzong Formation	91.85	29.7667	160 ~ 149	12.8 to 9.7	Meng et al., 2019
Nouth belt of Southern Lhasa	XY8-2-1	Sandstone	Linbuzong Formation	91.85	29.7667	156 ~ 148	6.4 to 7.7	Meng et al., 2019
Nouth belt of Southern Lhasa	17LZ-A	Sandstone	Shexing Formation	91.2167	29.9667	225 ~ 111	-17.6 to -3.9	Wang et al., 2020
Nouth belt of Southern Lhasa	13MQ20	Sandstone	Shexing Formation	90.7	29.9167	228 ~ 98	6.2 to 11.7	Wang et al., 2020
Nouth belt of Southern Lhasa	13MQ15	Sandstone	Shexing Formation	90.7	29.9167	201 ~ 93	1.4 to 14.0	Wang et al., 2020
Nouth belt of Southern Lhasa	13LZ55	Sandstone	Shexing Formation	91.25	29.9	216 ~ 104	2.2 to 14.3	Wang et al., 2020
Nouth belt of Southern Lhasa	13LZ49	Sandstone	Shexing Formation	91.25	29.9	228 ~ 105	0.9 to 16.0	Wang et al., 2020
Nouth belt of Southern Lhasa	14MQ-A	Sandstone	Shexing Formation	91.75	29.8333	225 ~ 106	-16.9 to -0.3	Wang et al., 2020
Nouth belt of Southern Lhasa	13LZ29	Sandstone	Shexing Formation	91.2833	29.9333	230 ~ 106	3.2 to 14.7	Wang et al., 2020
Nouth belt of Southern Lhasa	13LZ38	Sandstone	Shexing Formation	91.2833	29.9333	230 ~ 106	1.6 to 14.6	Wang et al., 2020
Nouth belt of Southern Lhasa	14LZ01	Sandstone	Shexing Formation	91.3833	29.9	163 ~ 114	-4.8 to 12.9	Wang et al., 2020
Nouth belt of Southern Lhasa	13LZ06	Sandstone	Shexing Formation	91.35	29.8667	229 ~ 116	1.2 to 15.4	Wang et al., 2020
Nouth belt of Southern Lhasa	MX1102	Sandstone	Shexing Formation	90.75	29.8833	122 ~ 88	-10.6 to -6.8	Wei et al., 2020
Nouth belt of Southern Lhasa	MX1104	Sandstone	Shexing Formation	90.75	29.8833	218 ~ 85	-16.5 to -1.7	Wei et al., 2020
Nouth belt of Southern Lhasa	MX1106	Sandstone	Shexing Formation	90.75	29.8833	215 ~ 82	-16.5 to -1.1	Wei et al., 2020
Nouth belt of Southern Lhasa	MX1108	Sandstone	Shexing Formation	90.75	29.8833	214 ~ 91	-10.1 to -0.5	Wei et al., 2020
South belt of Southern Lhasa	D47A	Mudstone	Chumulong Formation	91.8	29.3667	228 ~ 121	0.9 to 14.7	Wei et al., 2020
South belt of Southern Lhasa	D47B	Mudstone	Chumulong Formation	91.8	29.3667	218 ~ 119	-24.4 to 13.1	Wei et al., 2020
South belt of Southern Lhasa	D11.1	Sandstone	Bima Formation	88.5869	29.3594	191 ~ 161	4.8 to 15.0	Deng et al., 2021
South belt of Southern Lhasa	D22.1	Sandstone	Bima Formation	88.5859	29.3603	198 ~ 166	6.0 to 13.7	Deng et al., 2021
South belt of Southern Lhasa	SR05-1	Sandstone	Bima Formation	92.0355	29.2686	201 ~ 168	4.1 to 14.7	Deng et al., 2021
South belt of Southern Lhasa	SR12-1	Sandstone	Bima Formation	92.0323	29.2697	194 ~ 186	11.8 to 14.0	Deng et al., 2021
South belt of Southern Lhasa	BL01-14-3	Sandstone	Xiongcun Formation	88.4031	29.3668	220 ~ 167	12.9 to 16.0	Lang et al., 2018
South belt of Southern Lhasa	BL21-06-05	Sandstone	Xiongcun Formation	88.364	29.3891	229 ~ 199	10.5 to 16.2	Lang et al., 2018
Forearc basin of Gangdese Arc	AR-01	Siltstone	Xigaze Group	85.3186	29.4889	222 ~ 77	-4.0 to 15.1	Wu et al., 2010
Forearc basin of Gangdese Arc	SS01-1	Sandstone	Xigaze Group	86.0861	29.4669	227 ~ 87	-18.1 to 14.4	Wu et al., 2010
Forearc basin of Gangdese Arc	JD-1	Sandstone	Xigaze Group	88.3706	29.1553	202 ~ 105	6.6 to 17.4	Wu et al., 2010
Forearc basin of Gangdese Arc	06FW171	Sandstone	Xigaze Group	88.8594	29.3131	197 ~ 95	-10.5 to 18.1	Wu et al., 2010
Forearc basin of Gangdese Arc	06FW172	Sandstone	Xigaze Group	88.8078	29.2228	189 ~ 88	2.9 to 16.5	Wu et al., 2010
Forearc basin of Gangdese Arc	06FW173	Sandstone	Xigaze Group	88.8008	29.2078	220 ~ 77	-10.7 to 15.0	Wu et al., 2010
Forearc basin of Gangdese Arc	09PDN63	Sandstone	Xigaze Group	86.7416	29.3424	131 ~ 97	-14.0 to -11.8	An et al., 2014
Forearc basin of Gangdese Arc	09PDN01	Sandstone	Xigaze Group	86.7373	29.3582	230 ~ 77	-13.9 to 14.7	An et al., 2014
Forearc basin of Gangdese Arc	09PDN-H	Sandstone	Xigaze Group	86.7368	29.3589	159 ~ 80	-12.0 to 14.0	An et al., 2014
Forearc basin of Gangdese Arc	09NX09	Sandstone	Xigaze Group	88.4441	29.1351	171 ~ 96	4.9 to 14.7	An et al., 2014
Forearc basin of Gangdese Arc	09NX34	Sandstone	Xigaze Group	88.4477	29.1428	170 ~ 98	5.2 to 14.7	An et al., 2014
Forearc basin of Gangdese Arc	10AR02	Sandstone	Xigaze Group	89.0572	29.2887	225 ~ 86	-16.0 to 13.0	An et al., 2014
Forearc basin of Gangdese Arc	12AR07	Sandstone	Xigaze Group	87.2102	29.2849	226 ~ 74	-24.5 to 12.3	An et al., 2014
Forearc basin of Gangdese Arc	10AR-A08	Sandstone	Xigaze Group	87.2856	29.3261	159 ~ 87	6.3 to 14.6	An et al., 2014
Forearc basin of Gangdese Arc	10AR-A15	Sandstone	Xigaze Group	87.3169	29.3708	120 ~ 97	5.7 to 14.8	An et al., 2014
Forearc basin of Gangdese Arc	15NX02	Sandstone	Xigaze Group	88.4418	29.1386	180 ~ 104	4.1 to 14.8	Wang et al., 2017b
Forearc basin of Gangdese Arc	15PL28	Sandstone	Xigaze Group	89.4407	29.2928	198 ~ 107	-7.5 to 16.4	Wang et al., 2017b
Forearc basin of Gangdese Arc	15QR83	Sandstone	Xigaze Group	89.0434	29.1557	116 ~ 107	-6.5 to 15.9	Wang et al., 2017b
Forearc basin of Gangdese Arc	15QR96	Sandstone	Xigaze Group	89.0434	29.1557	123 ~ 106	-5.6 to 15.6	Wang et al., 2017b
Forearc basin of Gangdese Arc	15TG03	Sandstone	Xigaze Group	89.028	29.1418	121 ~ 106	12.4 to 18.5	Wang et al., 2017b
Forearc basin of Gangdese Arc	15TG34	Sandstone	Xigaze Group	89.028	29.1418	129 ~ 107	-2.7 to 17.3	Wang et al., 2017b
Forearc basin of Gangdese Arc	Jl01	Sandstone		91.6255	29.2152	125 ~ 97	5.0 to 19.2	Zhang et al., 2020
Forearc basin of Gangdese Arc	Jl02	Sandstone		91.6255	29.2152	197 ~ 99	0.9 to 24.0	Zhang et al., 2020
Forearc basin of Gangdese Arc	Jl03	Sandstone		91.6255	29.2152	207 ~ 93	3.4 to 20.0	Zhang et al., 2020
Forearc basin of Gangdese Arc	Ld03	Sandstone		94.1889	29.2186	161 ~ 115	4.3 to 18.6	Zhang et al., 2020
Forearc basin of Gangdese Arc	Ld04	Sandstone		94.1889	29.2186	179 ~ 135	4.4 to 17.5	Zhang et al., 2020
Forearc basin of Gangdese Arc	Ld07	Sandstone		94.1889	29.2186	224 ~ 101	-14.8 to -2.7	Zhang et al., 2020
Forearc basin of Gangdese Arc	Lx01	Sandstone		93.1833	29.0167	185 ~ 83	-18.5 to -2.4	Zhang et al., 2020
Reference
An, W., Hu, X., Garzanti, E., BouDagher-Fadel, M.K., Wang, J., and Sun, G., 2014, Xigaze forearc basin revisited (South Tibet): Provenance changes and origin of the Xigaze Ophiolite: Geological Society of America Bulletin, v. 126, p. 1595–1613, https://doi.org/10.1130/B31020.1.
Deng, Y., Lang, X., Wang, X., Santosh, M., He, Q., and Yin, Q., 2021, Early mesozoic arc–back-arc system in the leading edge of the Tibetan Plateau: Lithos, v. 406–407, no. 106530, https://doi.org/10.1016/j.lithos.2021.106530.
Lang, X., Liu, D., Deng, Y., Tang, J., Wang, X., Yang, Z., Cui, Z., Feng, Y., Yin, Q., Xie, F., Huang, Y., and Zhang, J., 2018, Detrital zircon geochronology and geochemistry of Jurassic sandstones in the Xiongcun district, southern Lhasa subterrane, Tibet, China: implications for provenance and tectonic setting: Geological Magazine, v. 156, p. 683–701, https://doi.org/10.1017/s0016756818000122.
Meng, Y., Mooney, W.D., Ma, Y., Xu, H., and Tang, R., 2019, Back-arc basin evolution in the southern Lhasa sub-terrane, southern Tibet: Constraints from U-Pb ages and in-situ Lu-Hf isotopes of detrital zircons: Journal of Asian Earth Sciences, v. 185, no. 104026, https://doi.org/10.1016/j.jseaes.2019.104026.
Sun, G., Hu, X., and Sinclair, H.D., 2017, Early Cretaceous palaeogeographic evolution of the Coqen Basin in the Lhasa Terrane, southern Tibetan Plateau: Palaeogeography, Palaeoclimatology, Palaeoecology, v. 485, p. 101–118, https://doi.org/10.1016/j.palaeo.2017.06.006.
Wang, J.-G., Hu, X., Garzanti, E., Ji, W.-Q., Liu, Z.-C., Liu, X.-C., and Wu, F.-Y., 2017a, Early cretaceous topographic growth of the Lhasaplano, Tibetan plateau: Constraints from the Damxung conglomerate: Journal of Geophysical Research: Solid Earth, v. 122, p. 5748–5765, https://doi.org/10.1002/2017JB014278.
Wang, J.-G., Hu, X., Garzanti, E., An, W., and Liu, X.-C., 2017b, The birth of the Xigaze forearc basin in southern Tibet: Earth and Planetary Science Letters, v. 465, p. 38–47, https://doi.org/10.1016/j.epsl.2017.02.036.
Wang, J.-G., Hu, X., Garzanti, E., BouDagher-Fadel, M.K., Liu, Z.-C., Li, J., and Wu, F.-Y., 2020, From extension to tectonic inversion: Mid-Cretaceous onset of Andean-type orogeny in the Lhasa block and early topographic growth of Tibet: GSA Bulletin, v. 132, p. 2432–2454, https://doi.org/10.1130/B35314.1.
Wei, Y., Zhao, Z., Niu, Y., Zhu, D.-C., DePaolo, D.J., Jing, T., Liu, D., Guan, Q., and Sheikh, L., 2020, Geochemistry, detrital zircon geochronology and Hf isotope of the clastic rocks in southern Tibet: Implications for the Jurassic-Cretaceous tectonic evolution of the Lhasa terrane: Gondwana Research, v. 78, p. 41–57, https://doi.org/10.1016/j.gr.2019.08.014.
Wu, F.-Y., Ji, W.-Q., Liu, C.-Z., and Chung, S.-L., 2010, Detrital zircon U–Pb and Hf isotopic data from the Xigaze fore-arc basin: Constraints on Transhimalayan magmatic evolution in southern Tibet: Chemical Geology, v. 271, p. 13–25, https://doi.org/10.1016/j.chemgeo.2009.12.007.
Zhang, S.-H., Ji, W.-Q., Zhang, H., Chen, G.-H., Wang, J.-G., Meng, Z.-Y., Wu, F.-Y., and Ao, S., 2020, Identification of Forearc Sediments in the Milin-Zedong Region and Their Constraints on Tectonomagmatic Evolution of the Gangdese Arc, Southern Tibet: Lithosphere, v. 2020, no. 20, https://doi.org/10.2113/2020/8835259.
